# Supplementary material for: Role of phosphatase activity of soluble epoxide hydrolase in regulating simvastatin-activated endothelial nitric oxide synthase
Source: PubMed Central journal article supplement (PMC4548251; doi:10.1038/srep13524), 2015-08-25
Supplement: srep13524-s1.pdf [file srep13524-s1.pdf]

## **Supplementary Information**

### **Role of phosphatase activity of soluble epoxide hydrolase in regulating simvastatin-activated endothelial nitric oxide synthase**

Hsin-Han Hou, Yi-Jen Liao, Sheng-Huang Hsiao, Song-Kun Shyue, Tzong-Shyuan Lee

**Fig S3. Role of sEH phosphatase in regulating simvastatin-induced eNOS phosphorylation.**

Ⓟ eNOS1179  
Veh

Simvastatin 0 5 10 15 30 60 120

Ⓟ eNOS1179

Ⓟ Akt

Ⓟ Akt

0 5 10 15 30 60 120

E<sub>2</sub>

p-eNOS

E<sub>2</sub>

Simva

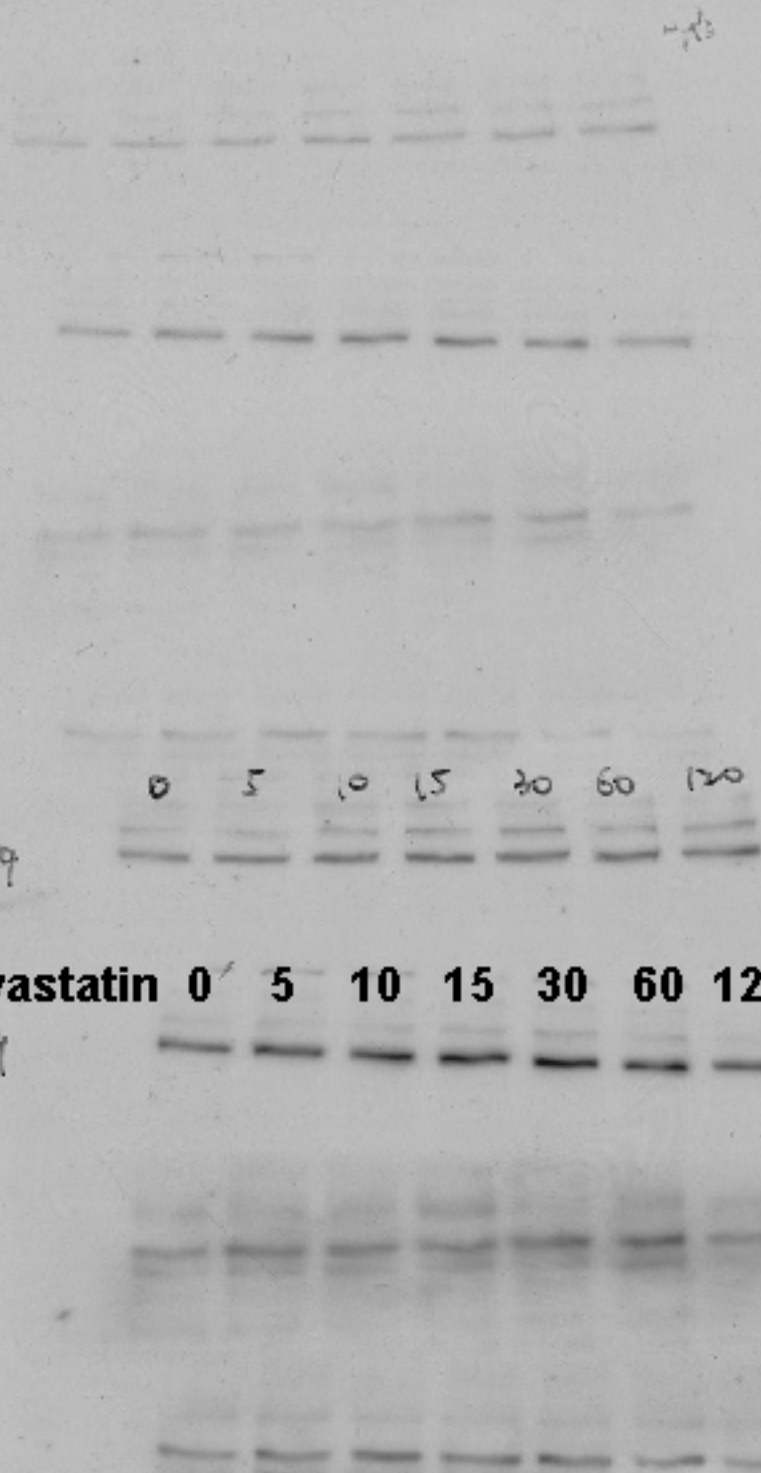

Veh

Simvastatin 0 5 10 15 30 60 120

tub

eNOS

eNOS

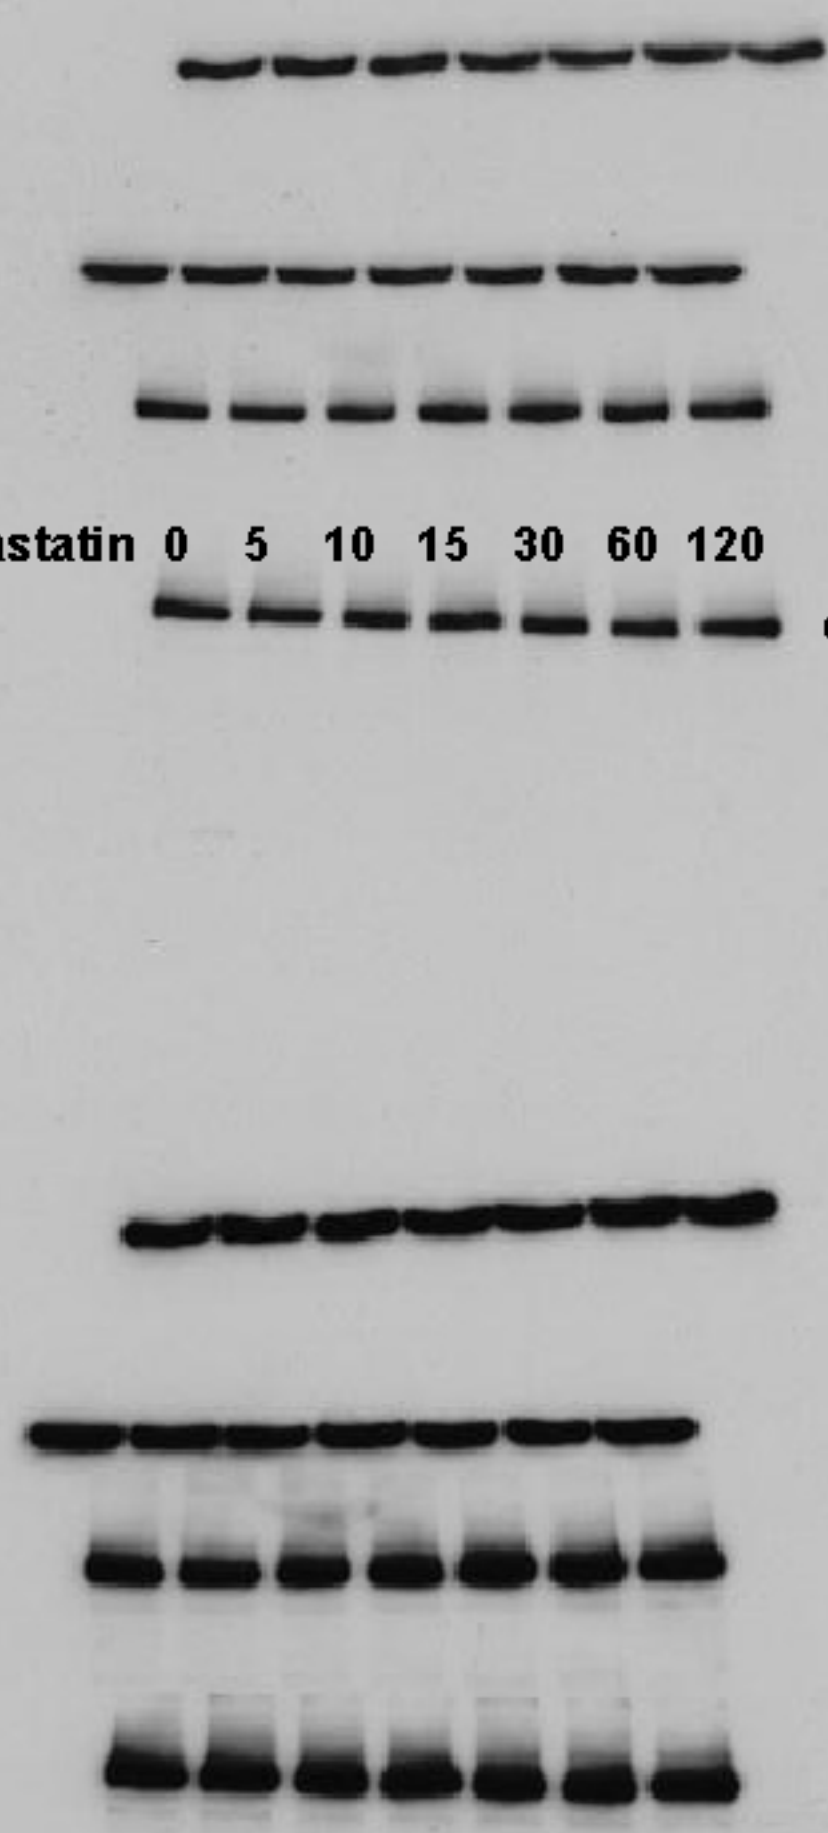



**AFC**

Simvastatin 0 5 10 15 30 60 120

**p-eNOS**

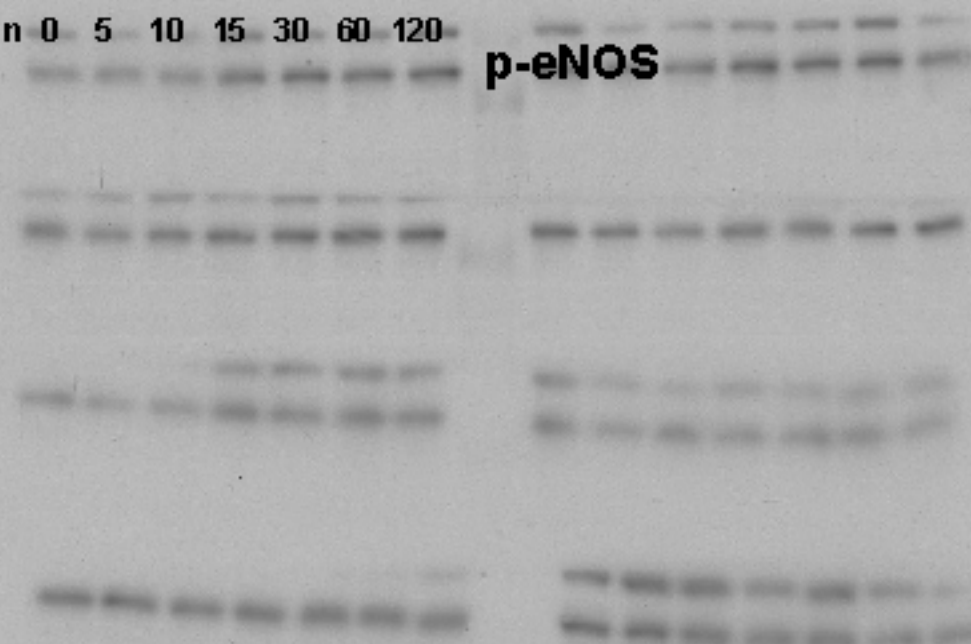

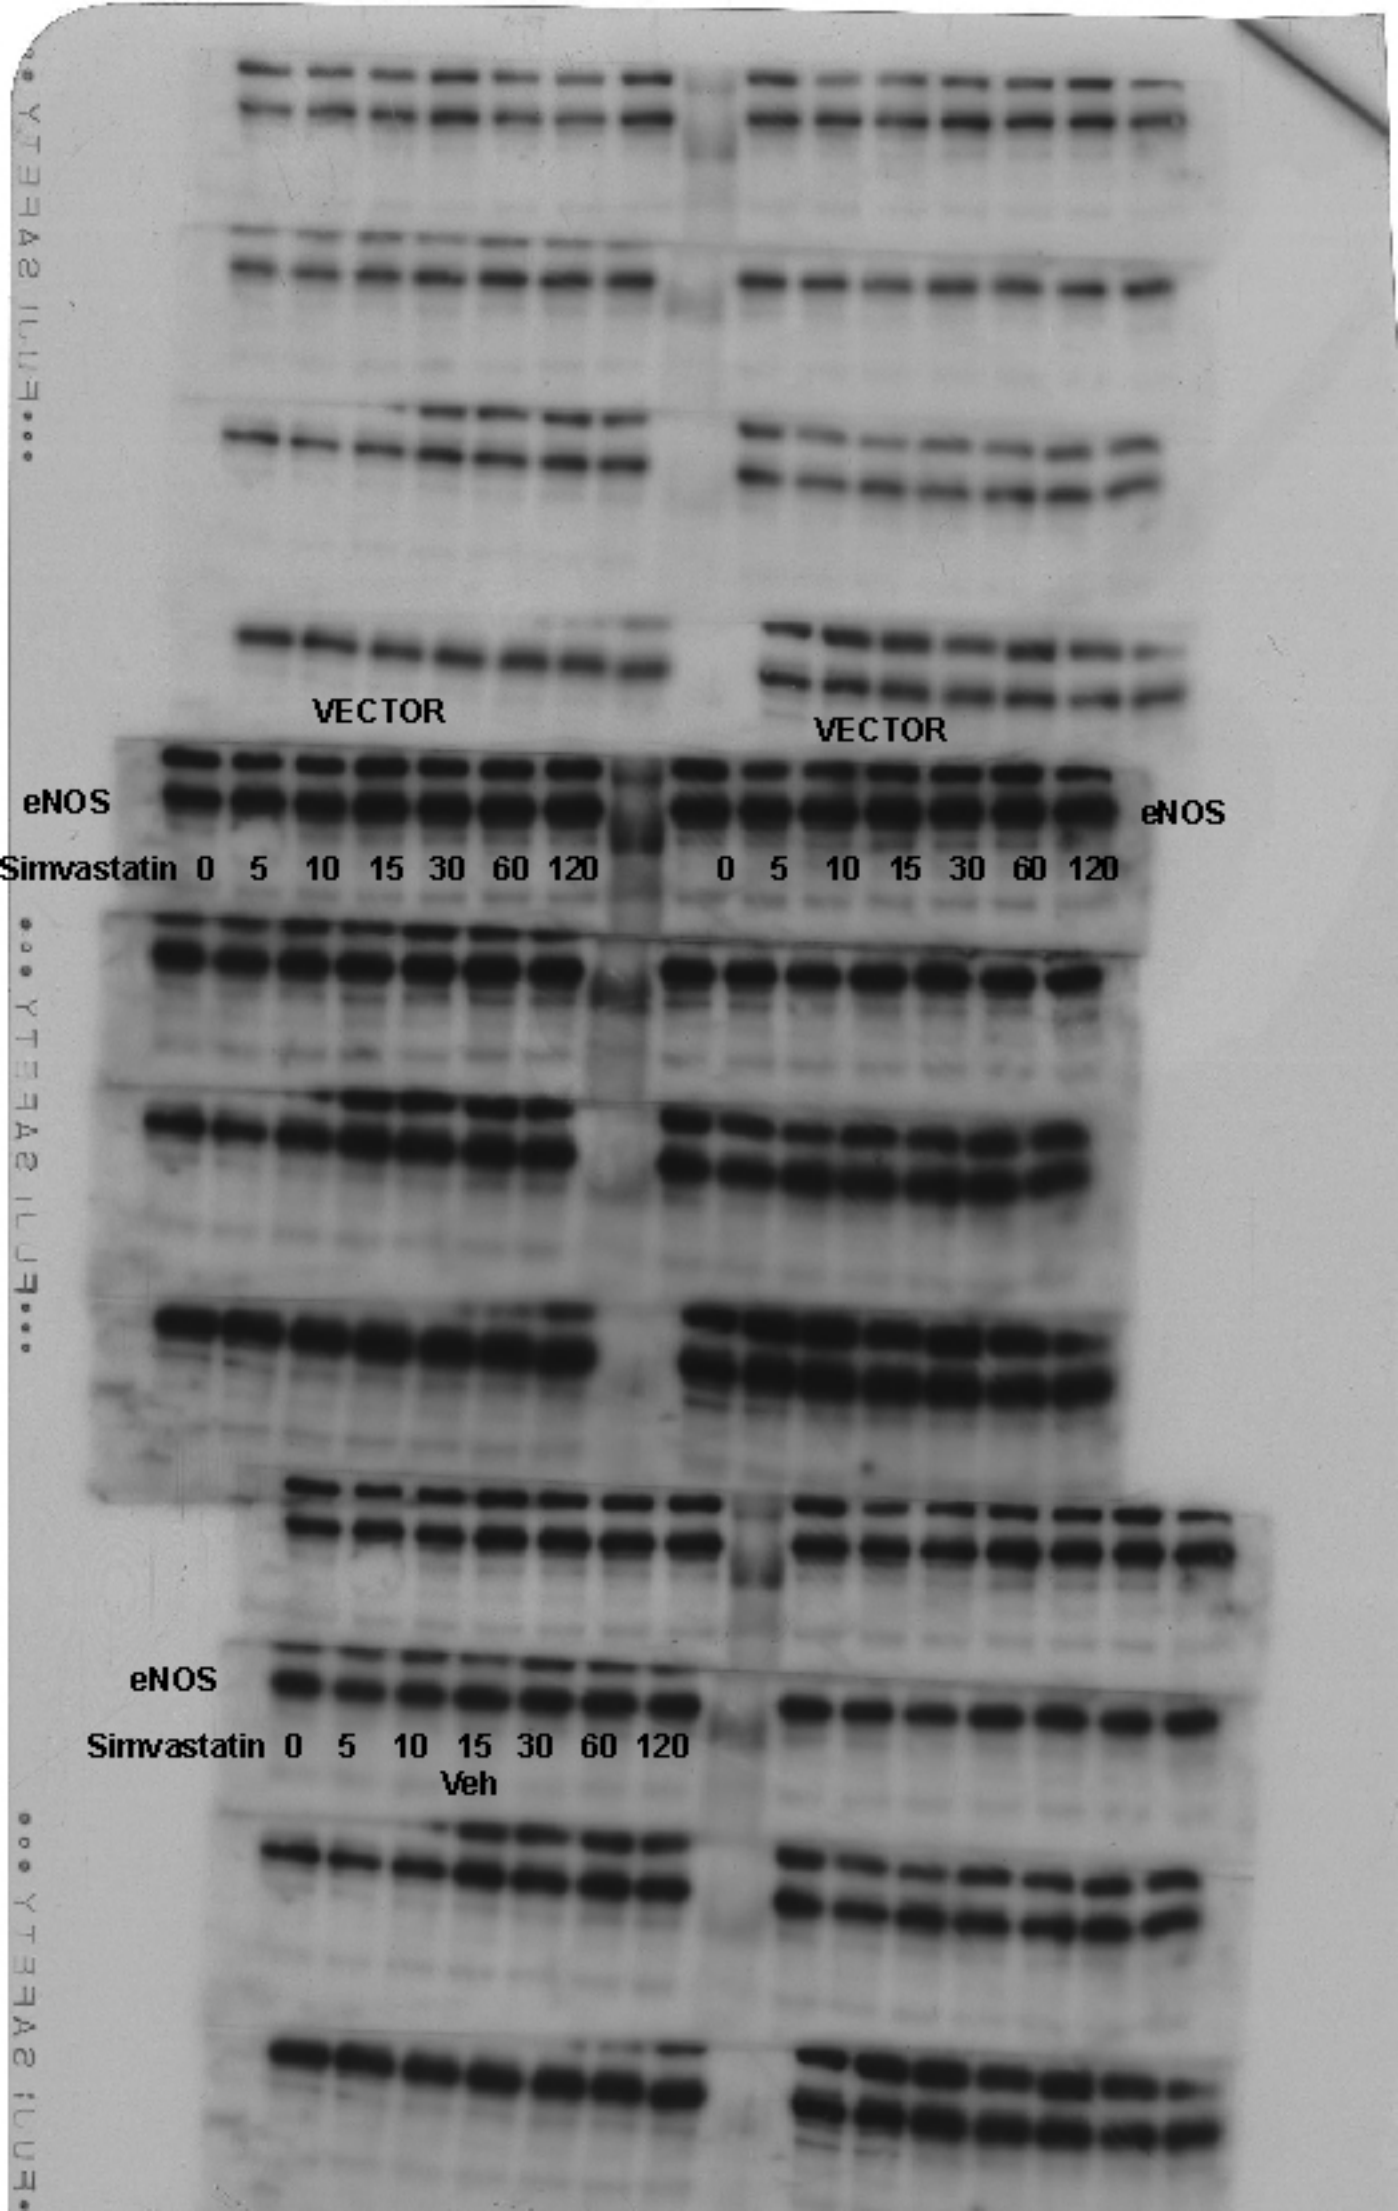

VECTOR

VECTOR

eNOS

eNOS

Simvastatin 0 5 10 15 30 60 120

0 5 10 15 30 60 120

eNOS

Simvastatin 0 5 10 15 30 60 120  
Veh

AUDA

Simvastatin 0 5 10 15 30 60 120

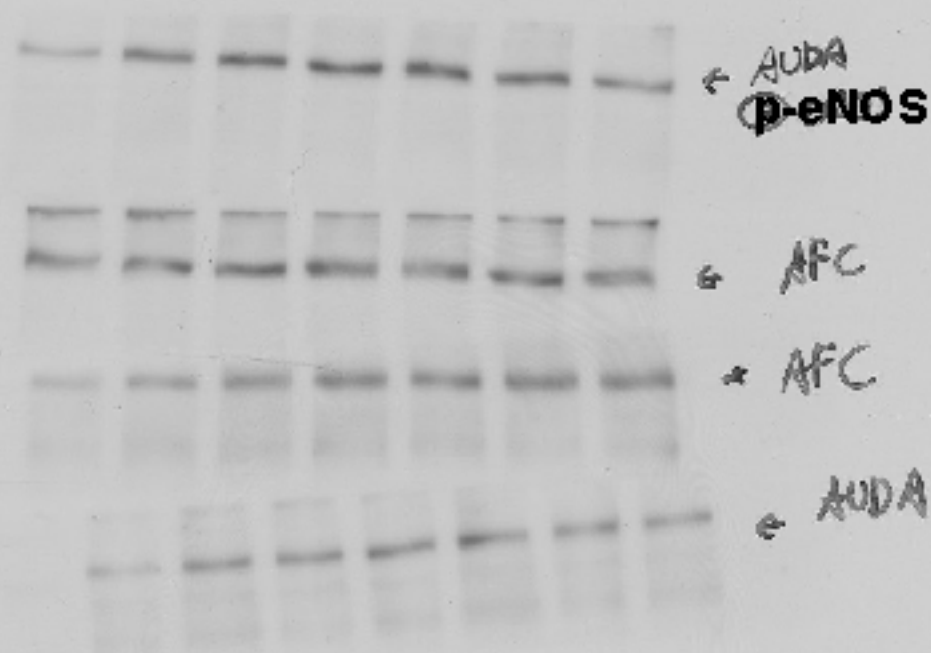

Western blot analysis showing protein levels of p-eNOS, AFC, and AUDA in response to Simvastatin treatment. The blot is divided into three main sections. The top section shows p-eNOS and AFC levels, with p-eNOS levels increasing and AFC levels decreasing over time. The middle section shows AFC levels, which remain relatively constant. The bottom section shows AUDA levels, which increase over time. Molecular weight markers are indicated on the right side of the blot.

Western blot analysis showing protein levels of p-eNOS, AFC, and AUDA in response to Simvastatin treatment. The blot is divided into three main sections. The top section shows p-eNOS and AFC levels, with p-eNOS levels increasing and AFC levels decreasing over time. The middle section shows AFC levels, which remain relatively constant. The bottom section shows AUDA levels, which increase over time. Molecular weight markers are indicated on the right side of the blot.

Western blot analysis showing protein levels of p-eNOS, AFC, and AUDA in response to Simvastatin treatment. The blot is divided into three main sections. The top section shows p-eNOS and AFC levels, with p-eNOS levels increasing and AFC levels decreasing over time. The middle section shows AFC levels, which remain relatively constant. The bottom section shows AUDA levels, which increase over time. Molecular weight markers are indicated on the right side of the blot.

Western blot analysis showing protein levels of p-eNOS, AFC, and AUDA in response to Simvastatin treatment. The blot is divided into three main sections. The top section shows p-eNOS and AFC levels, with p-eNOS levels increasing and AFC levels decreasing over time. The middle section shows AFC levels, which remain relatively constant. The bottom section shows AUDA levels, which increase over time. Molecular weight markers are indicated on the right side of the blot.

Western blot analysis showing protein levels of p-eNOS, AFC, and AUDA in response to Simvastatin treatment. The blot is divided into three main sections. The top section shows p-eNOS and AFC levels, with p-eNOS levels increasing and AFC levels decreasing over time. The middle section shows AFC levels, which remain relatively constant. The bottom section shows AUDA levels, which increase over time. Molecular weight markers are indicated on the right side of the blot.

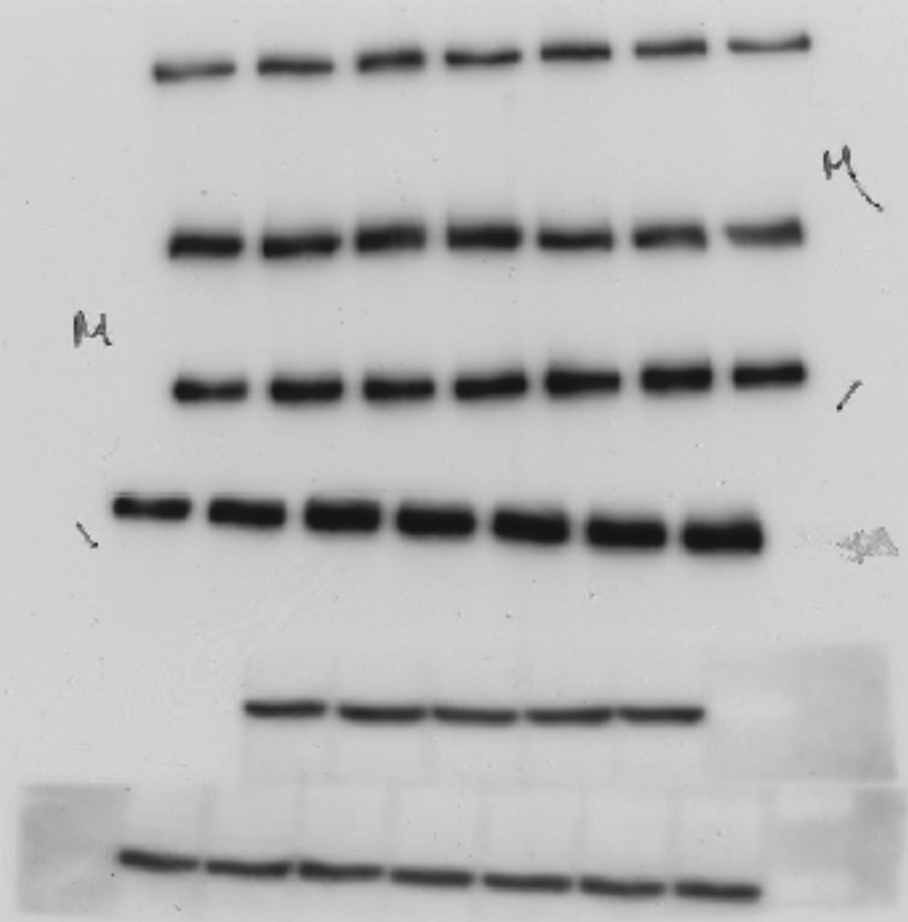

Simvastatin 0 5 10 15 30 60 120 eNOS

AUDA

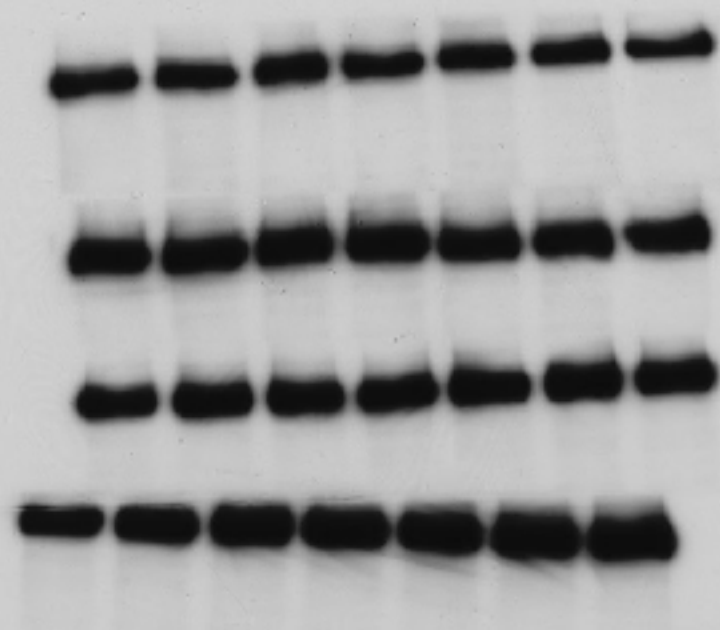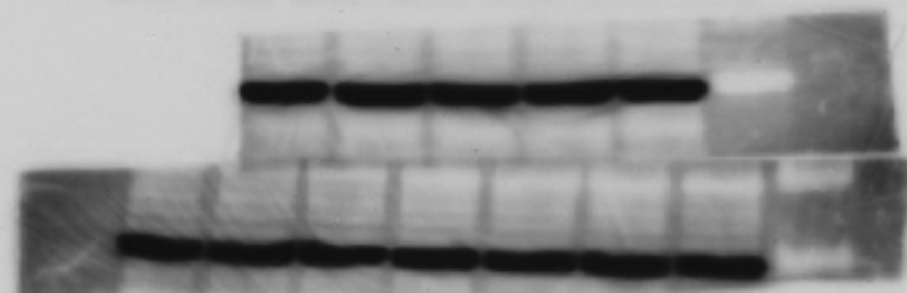

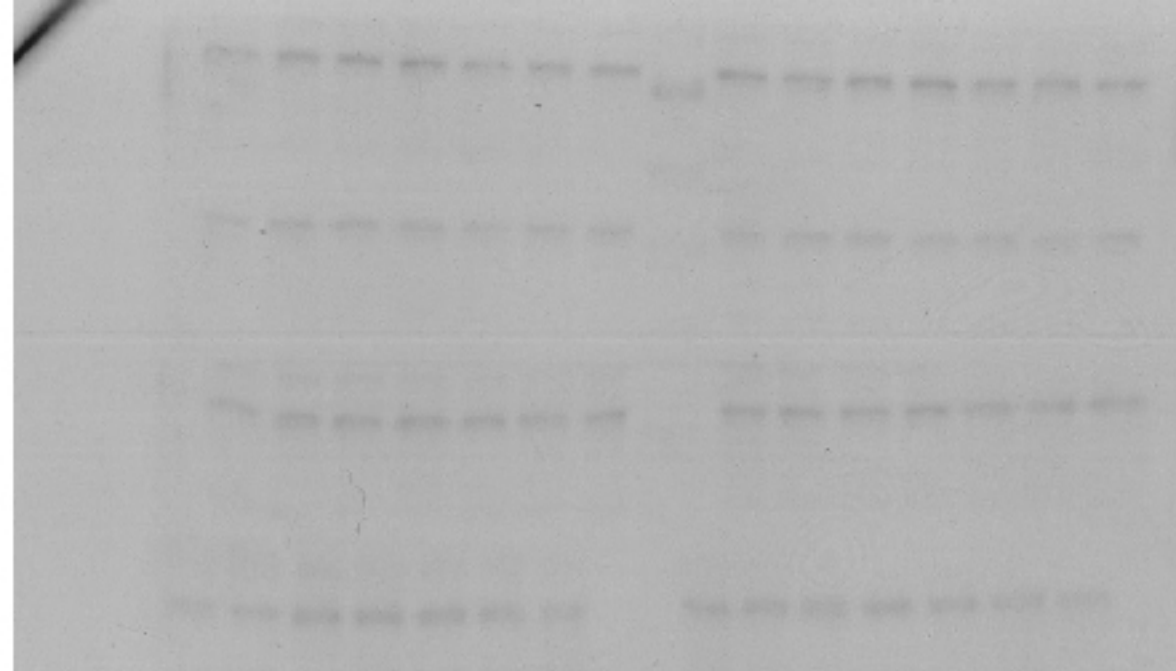

VECTOR

VECTOR

Simvastatin 0 5 10 15 30 60 120

0 5 10 15 30 60 120

p-eNOS

p-eNOS

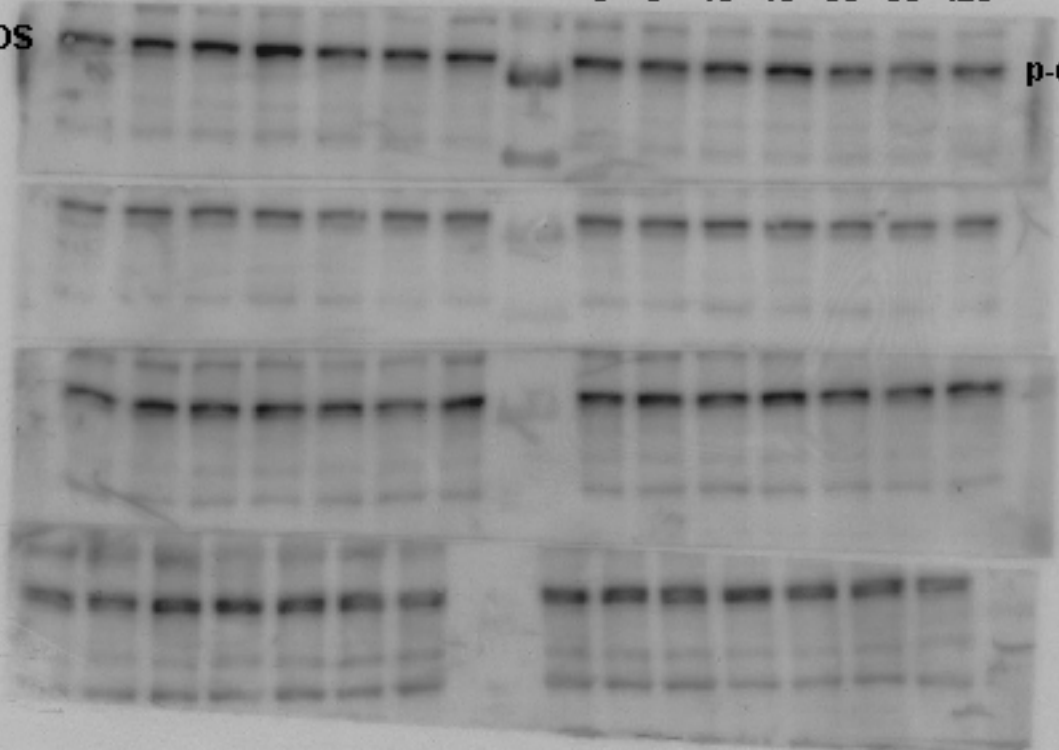



VECTOR

VECTOR

eNOS

eNOS

Simvastatin 0 5 10 15 30 60 120

0 5 10 15 30 60 120

eNOS

Simvastatin 0 5 10 15 30 60 120  
Veh



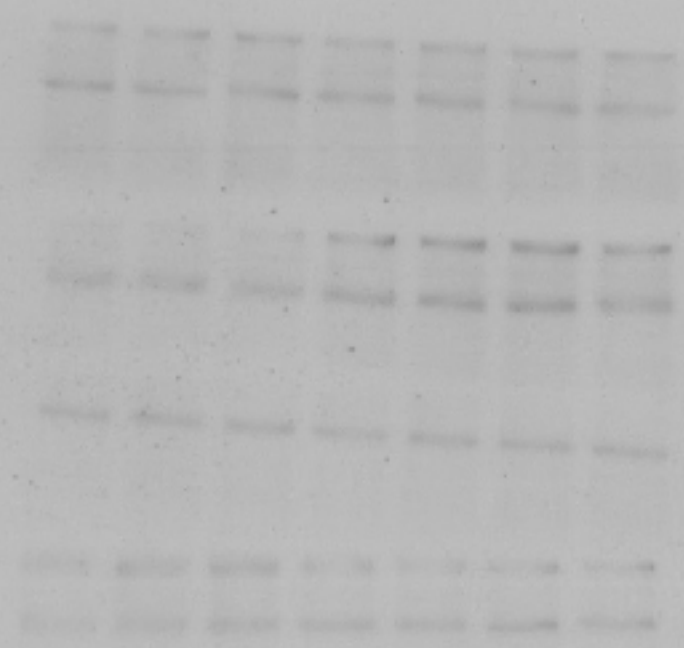

**Simvastatin**

**0**

**5**

**10**

**15**

**30**

**60**

**120**

**PTmut**

**N-ter**

**p-eNOS**

**p-eNOS**

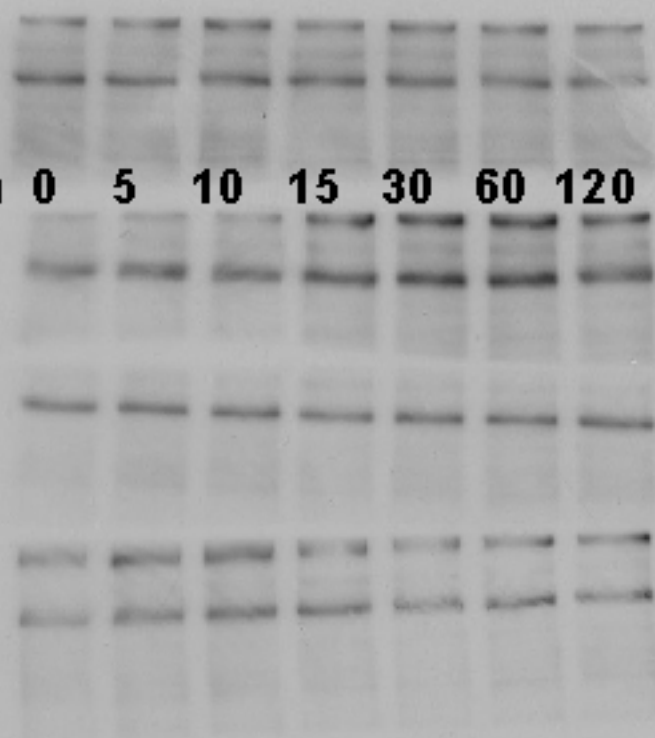

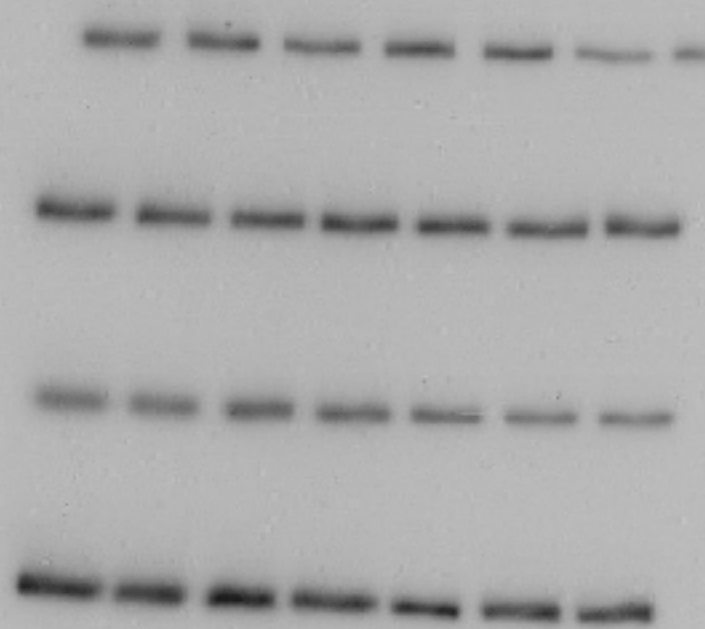

**Simvastatin 0 5 10 15 30 60 120**

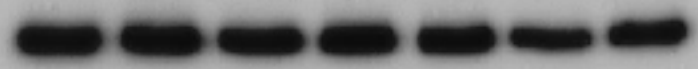

**PTmut eNOS**

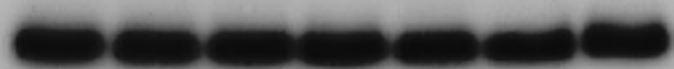

**N-ter eNOS**

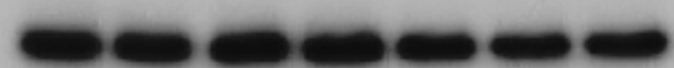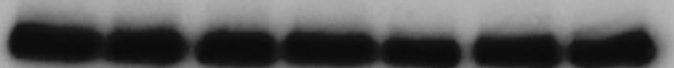



Simvastatin 0 5 10 15 30 60 120

EHmut

p-eNOS

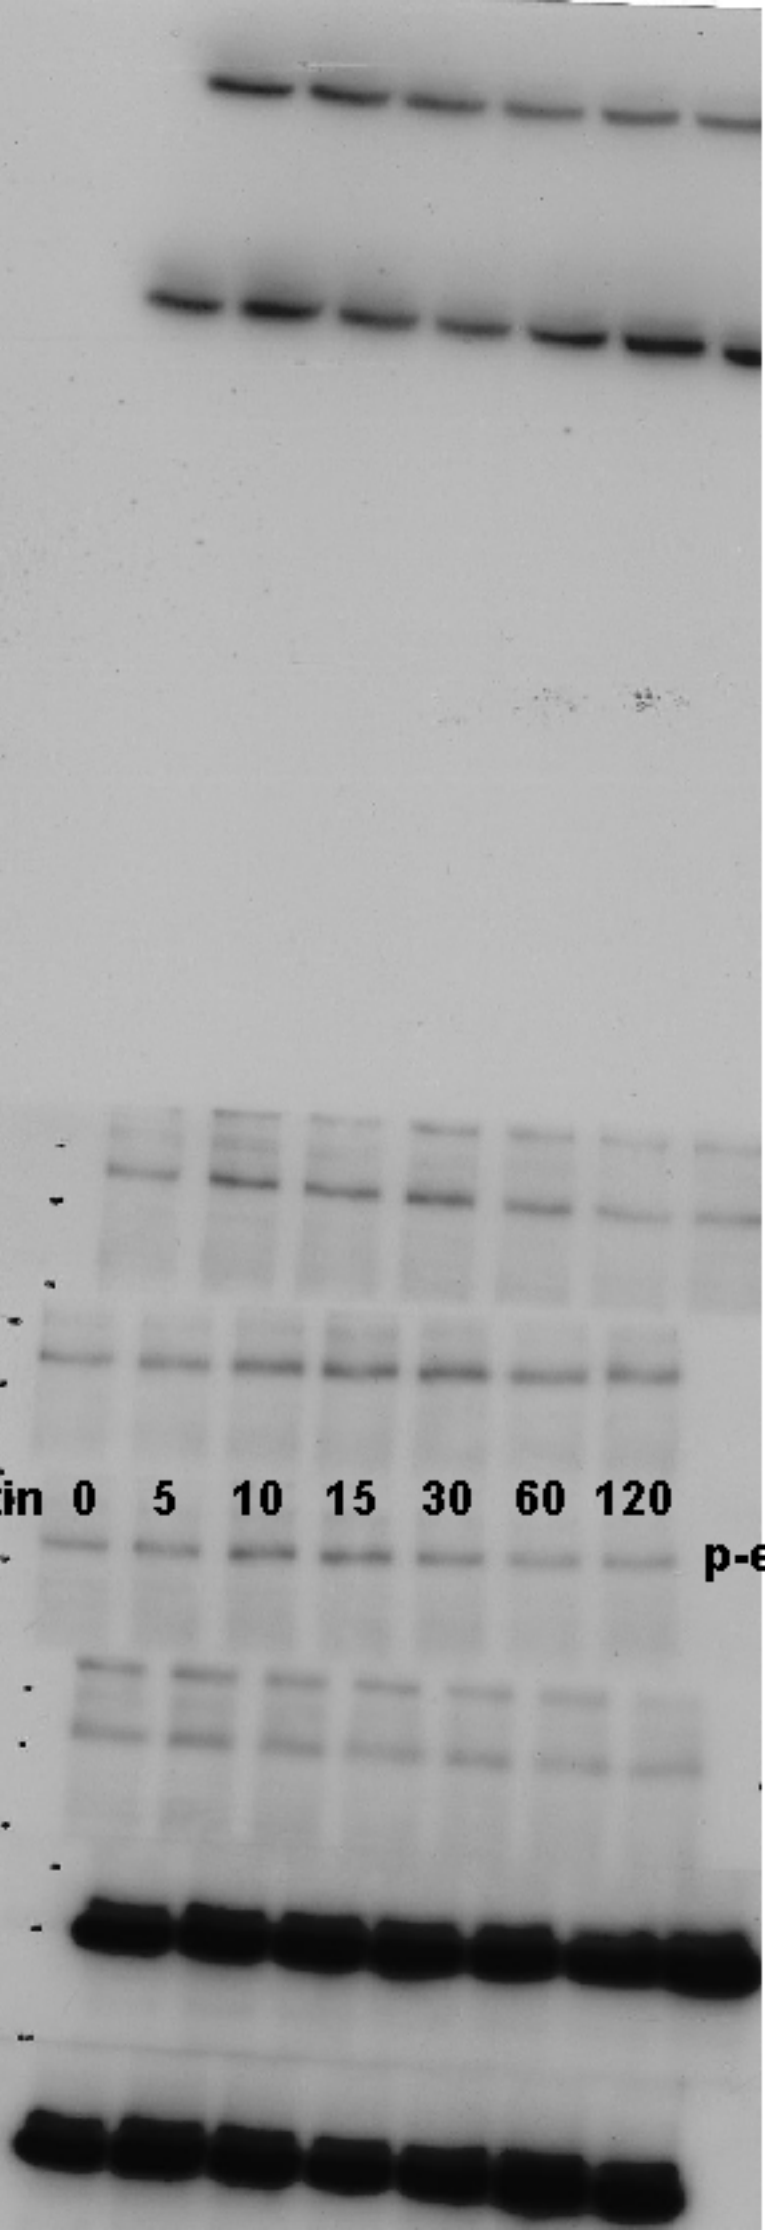

Simvastatin 0 5 10 15 30 60 120  
EHmut eNOS

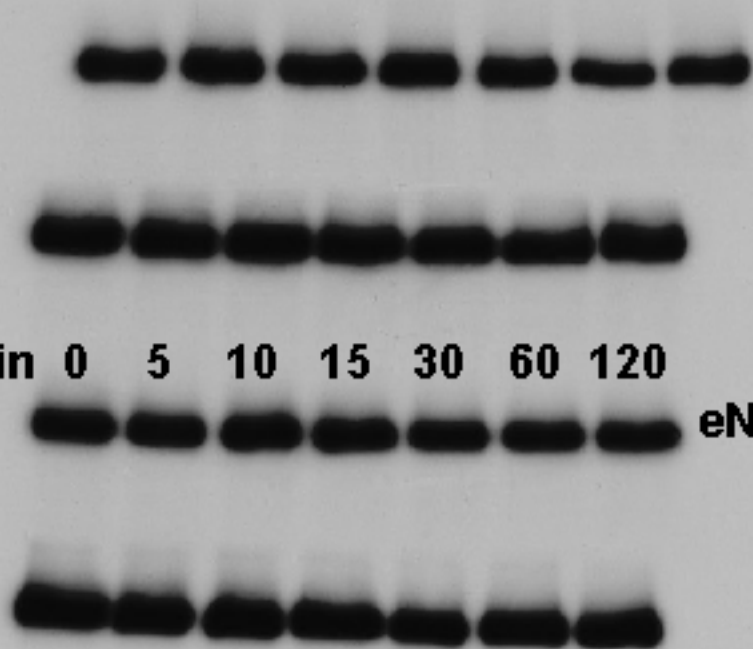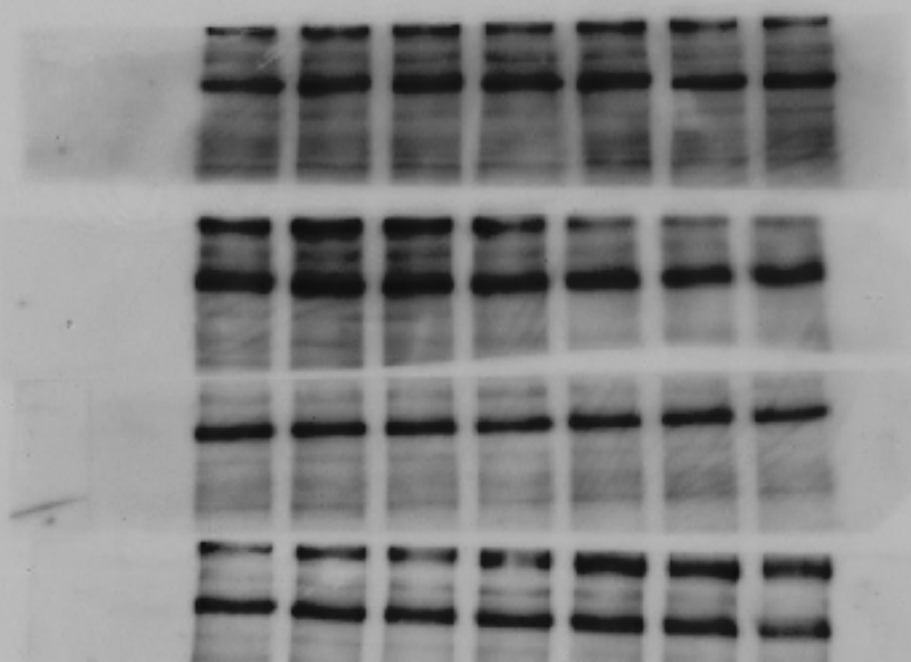

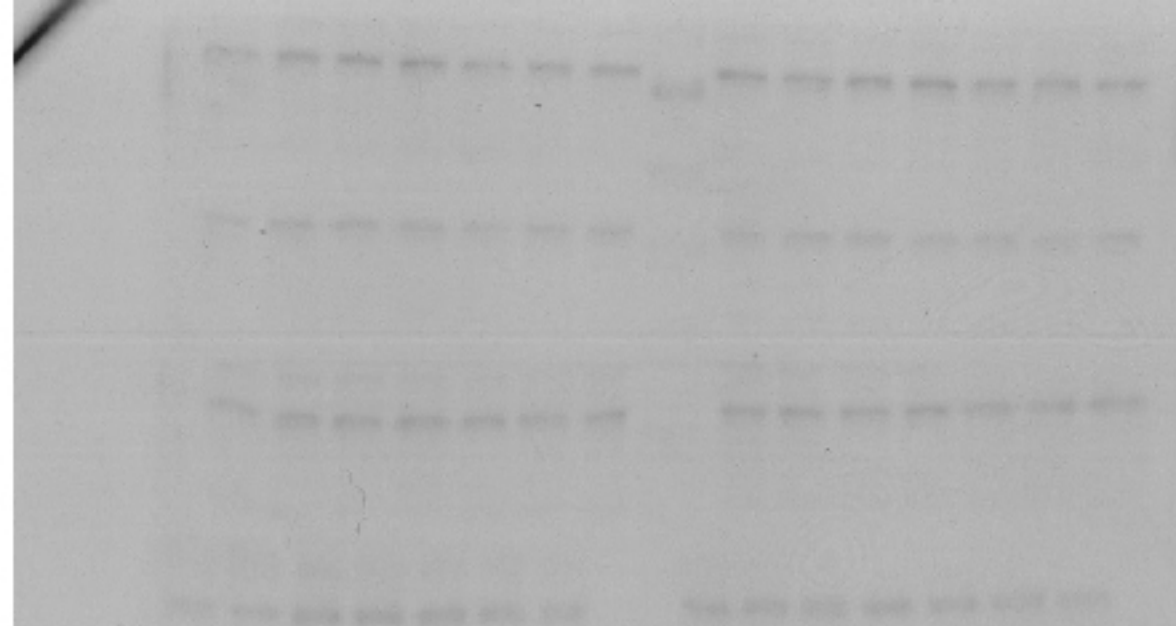

VECTOR

VECTOR

Simvastatin 0 5 10 15 30 60 120

0 5 10 15 30 60 120

p-eNOS

p-eNOS





VECTOR

VECTOR

eNOS

eNOS

Simvastatin 0 5 10 15 30 60 120

0 5 10 15 30 60 120

eNOS

Simvastatin 0 5 10 15 30 60 120  
Veh



**Simvastatin**

**0**

**5**

**10**

**15**

**30**

**60**

**120**

**PTmut**

**N-ter**

**p-eNOS**

**p-eNOS**





**Simvastatin 0 5 10 15 30 60 120**



**PTmut eNOS**



**N-ter eNOS**





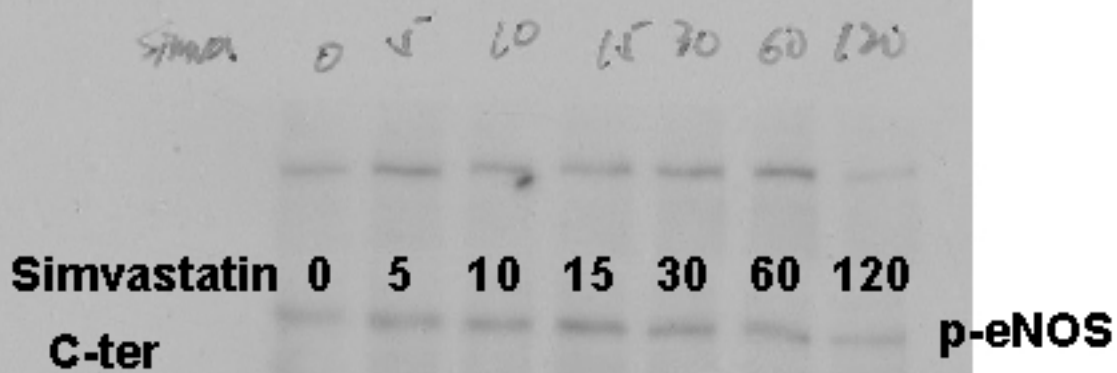

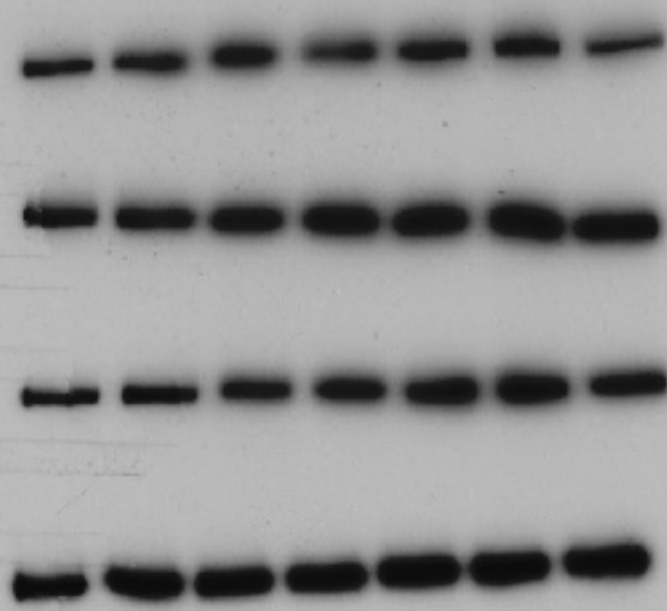

**Simvastatin** 0 5 10 15 30 60 120  
**C-ter** **eNOS**

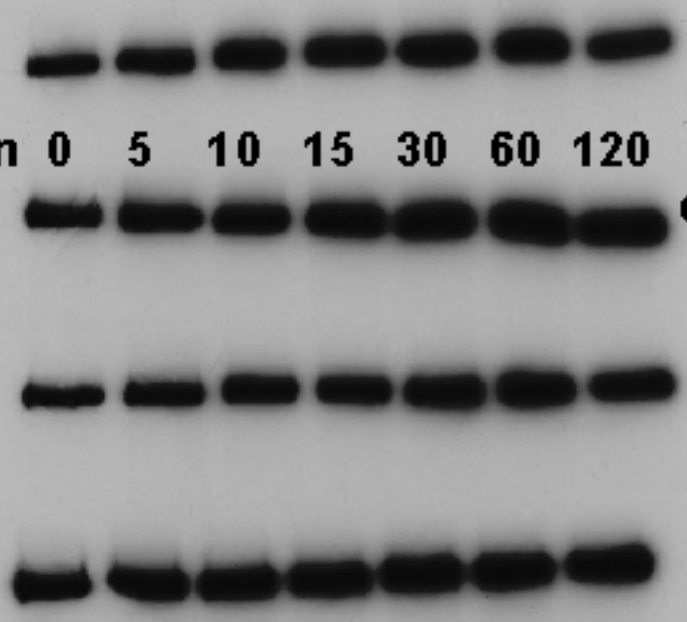



**Fig S4. sEH phosphatase plays a crucial role in regulating simvastatin-induced Akt and AMPK phosphorylation.**

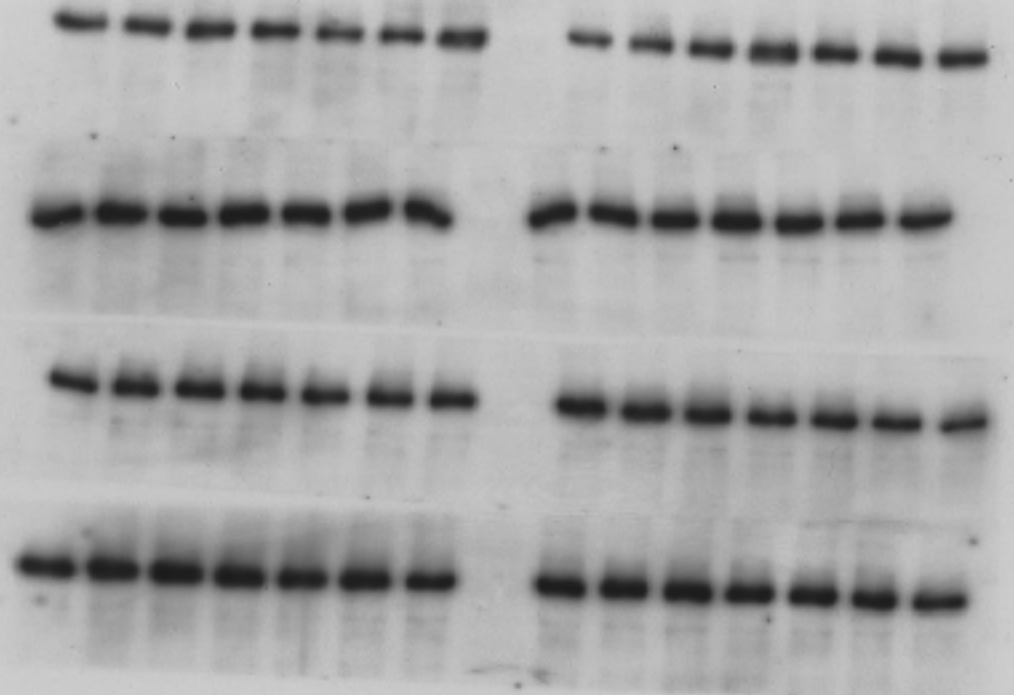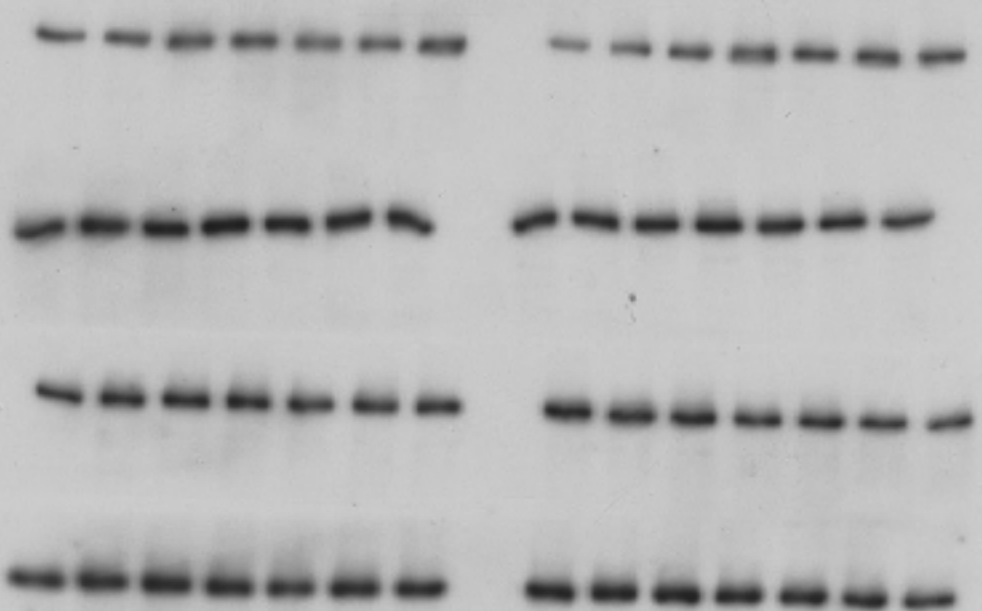

**AFC**

Simvastatin 0 5 10 15 30 60 120

**p-Akt**

**Veh**

Simvastatin 0 5 10 15 30 60 120

**p-Akt**

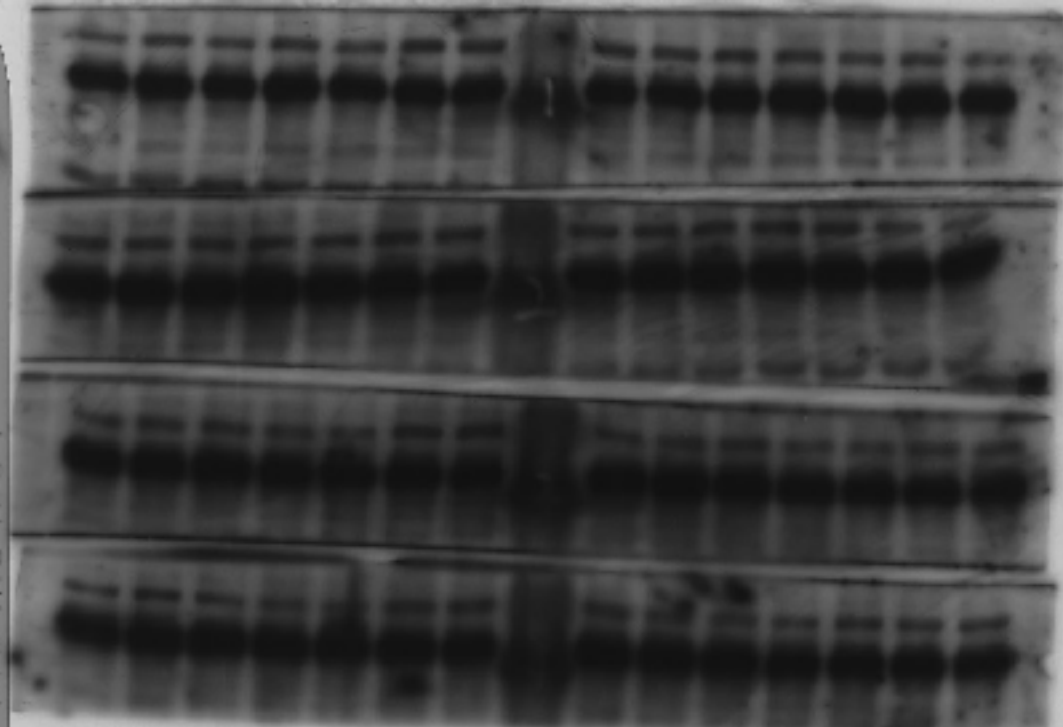

**AFC**

Simvastatin 0 5 10 15 30 60 120

**Akt**

**Veh**

Simvastatin 0 5 10 15 30 60 120

**Akt**

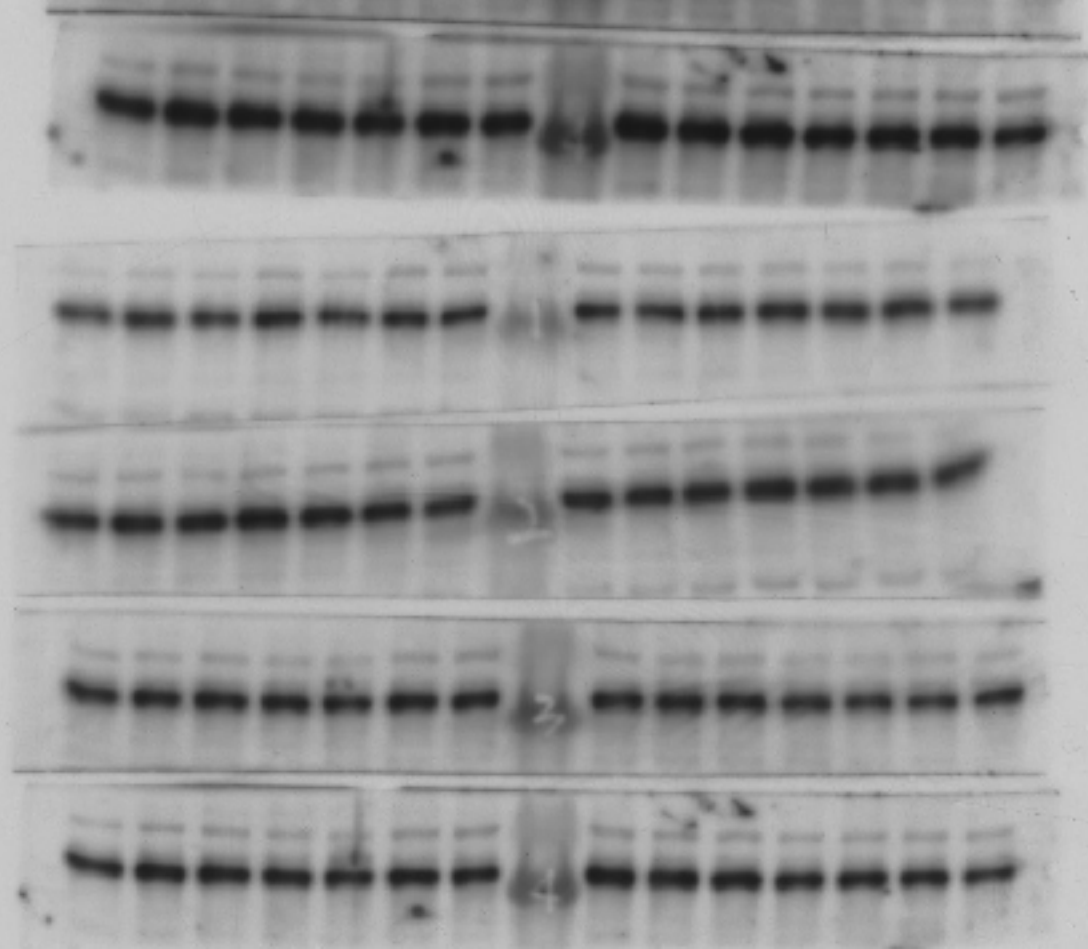



**AFC**

Simvastatin 0 5 10 15 30 60 120

**p-Akt**

**Veh**

Simvastatin 0 5 10 15 30 60 120

**p-Akt**



**AFC**

Simvastatin 0 5 10 15 30 60 120

**Akt**

**Veh**

Simvastatin 0 5 10 15 30 60 120

**Akt**

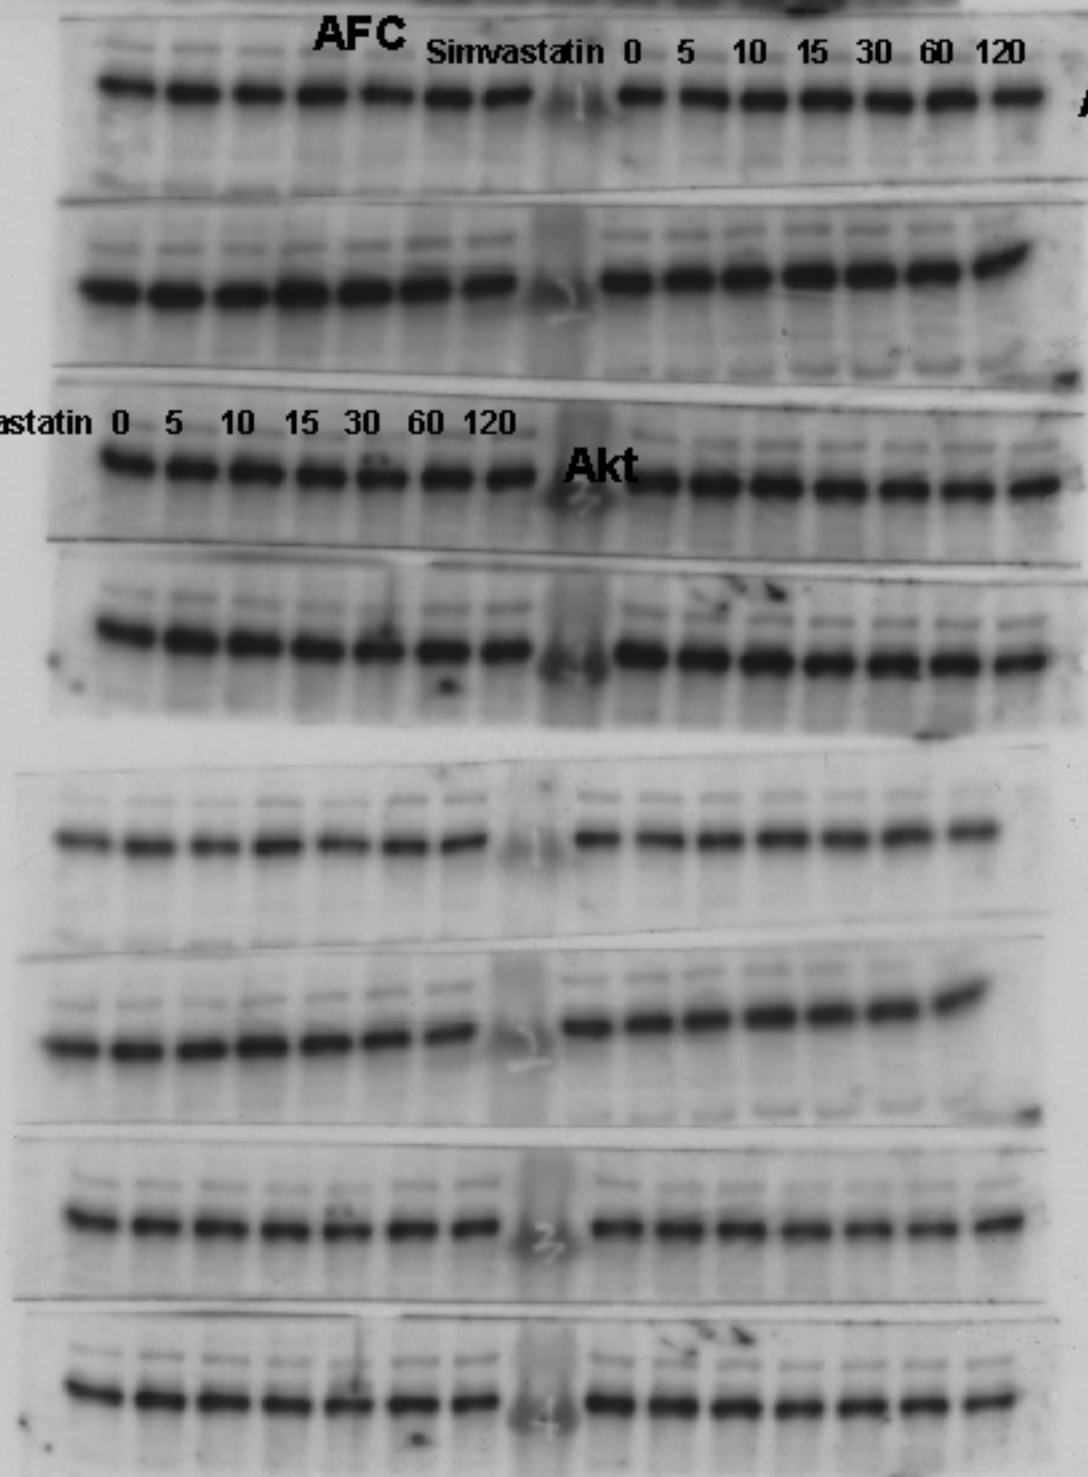

STIMULATED

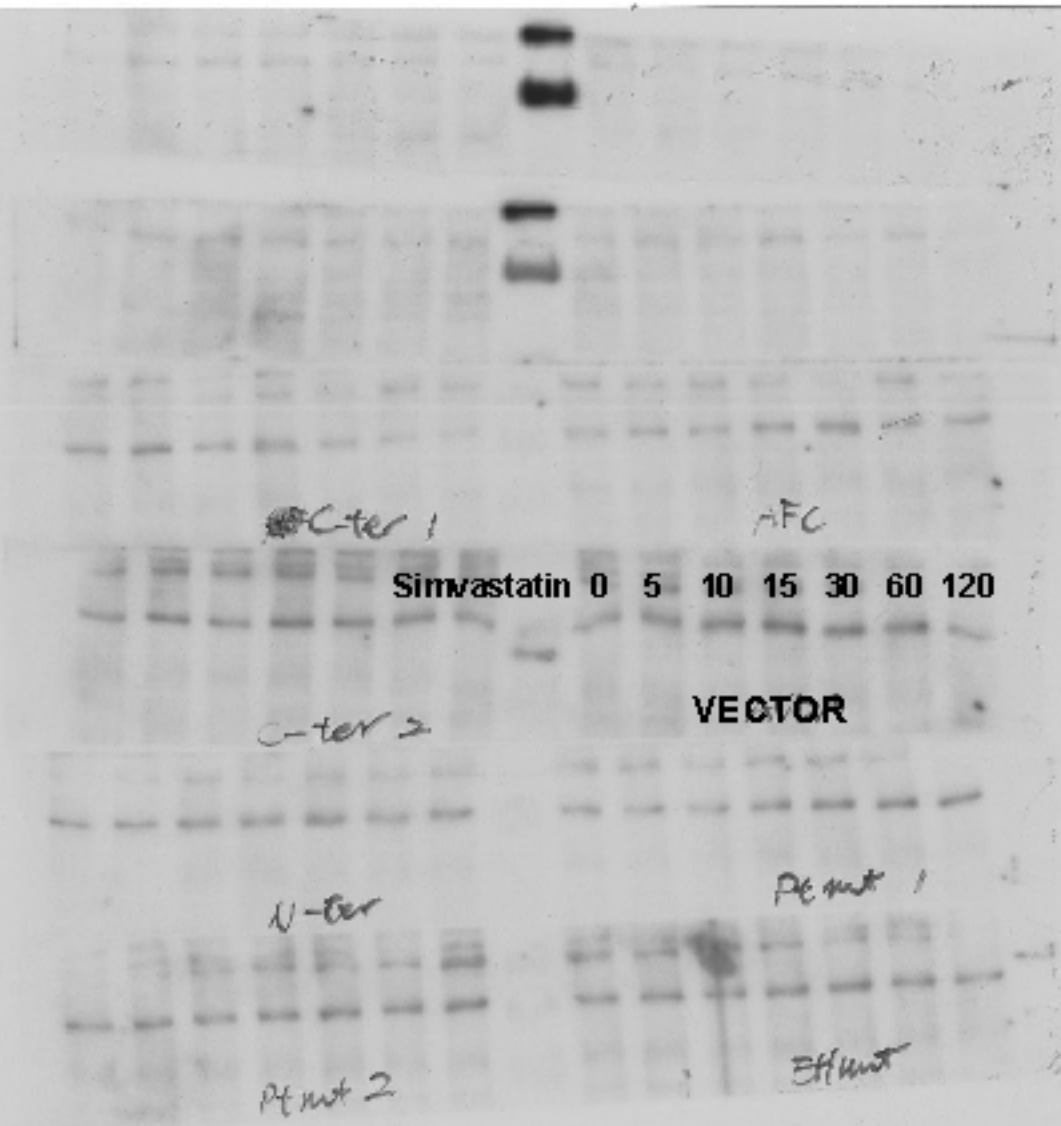

C-ter 1

AFC

Simvastatin 0 5 10 15 30 60 120

p-Akt

C-ter 2

VECTOR

N-ter

PE mut 1

PE mut 2

Eff mut

0 5 10 15 30 60 120

**VECTOR**

Simvastatin 0 5 10 15 30 60 120

**Akt**

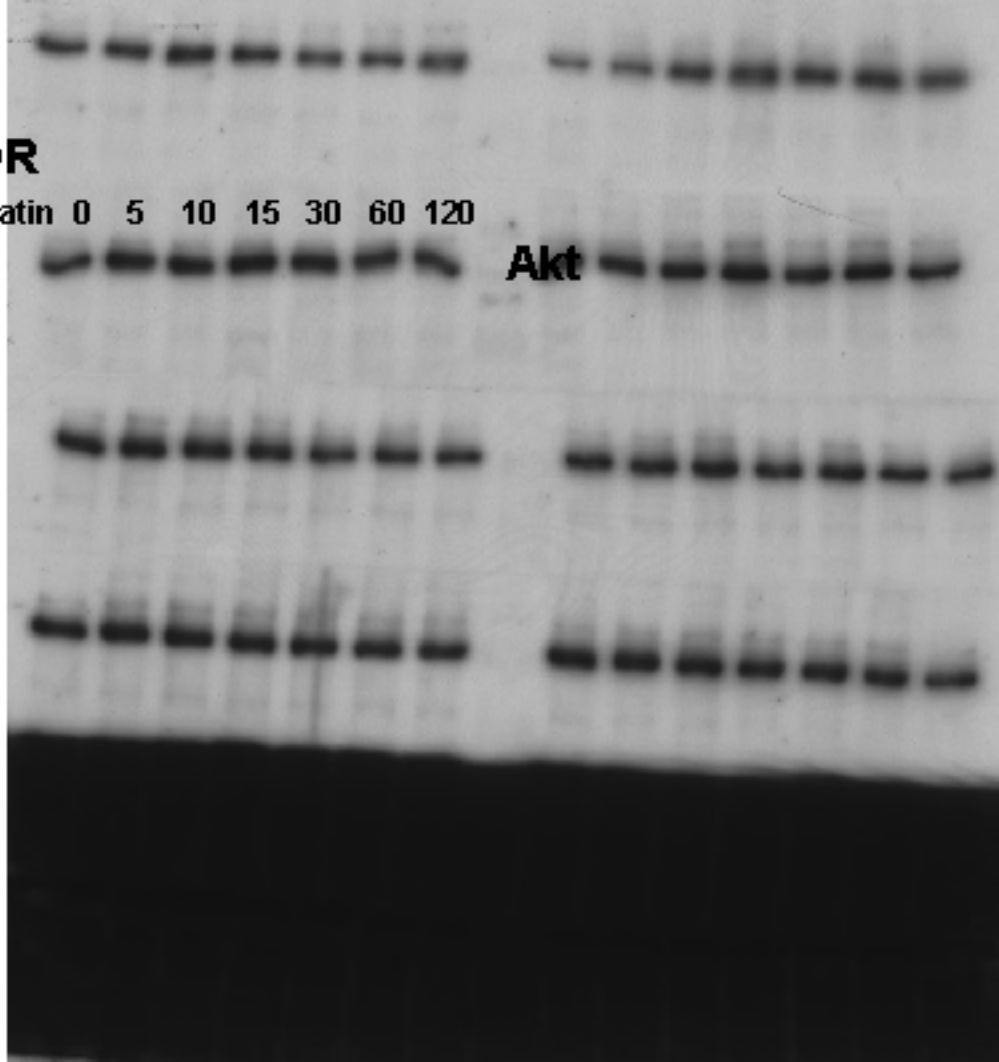

**PTmut**

Simvastatin 0 5 10 15 30 60 120

**p-Akt**

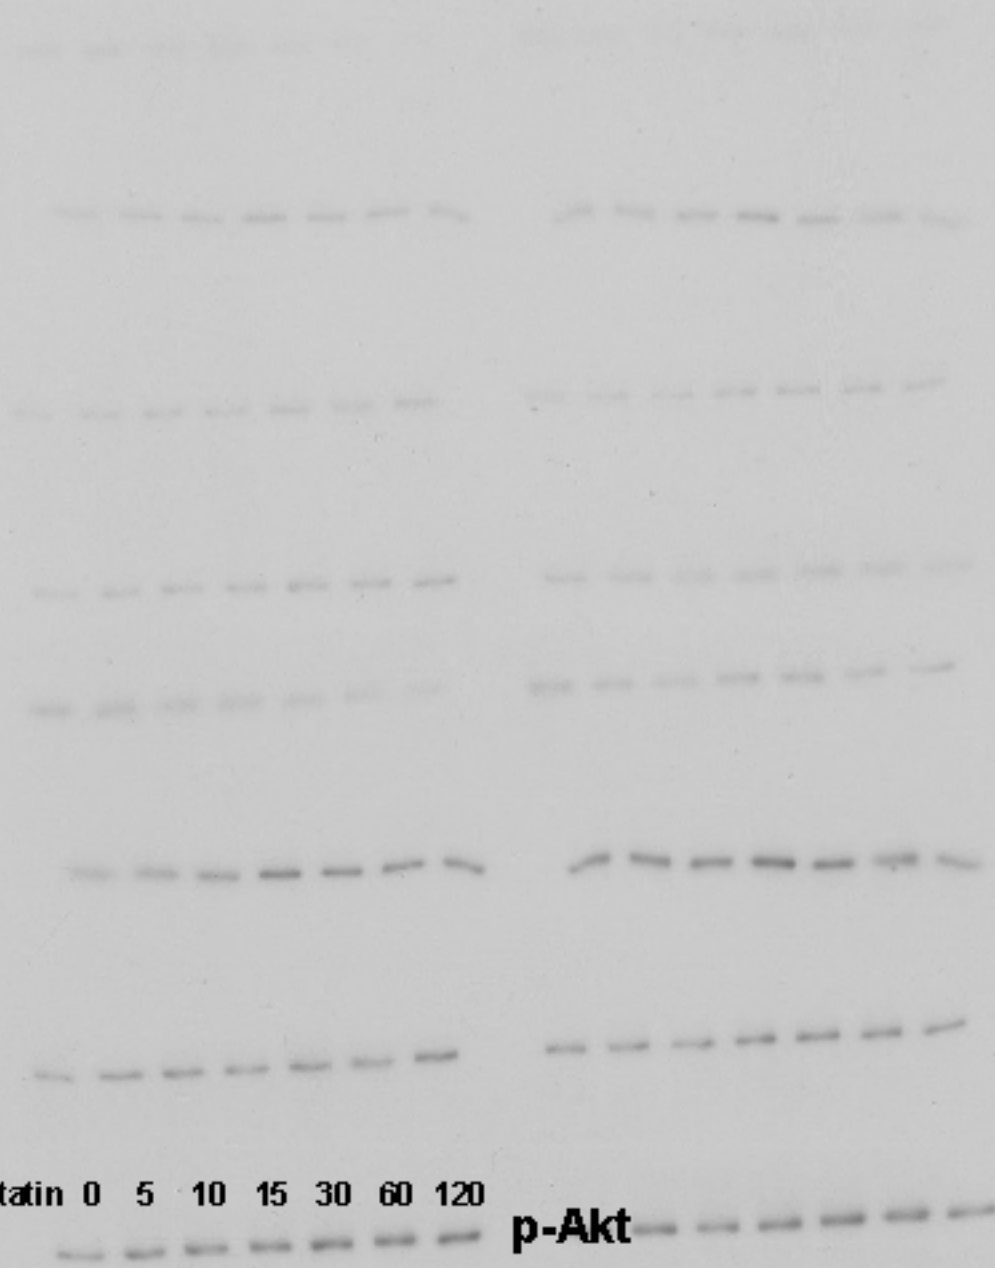



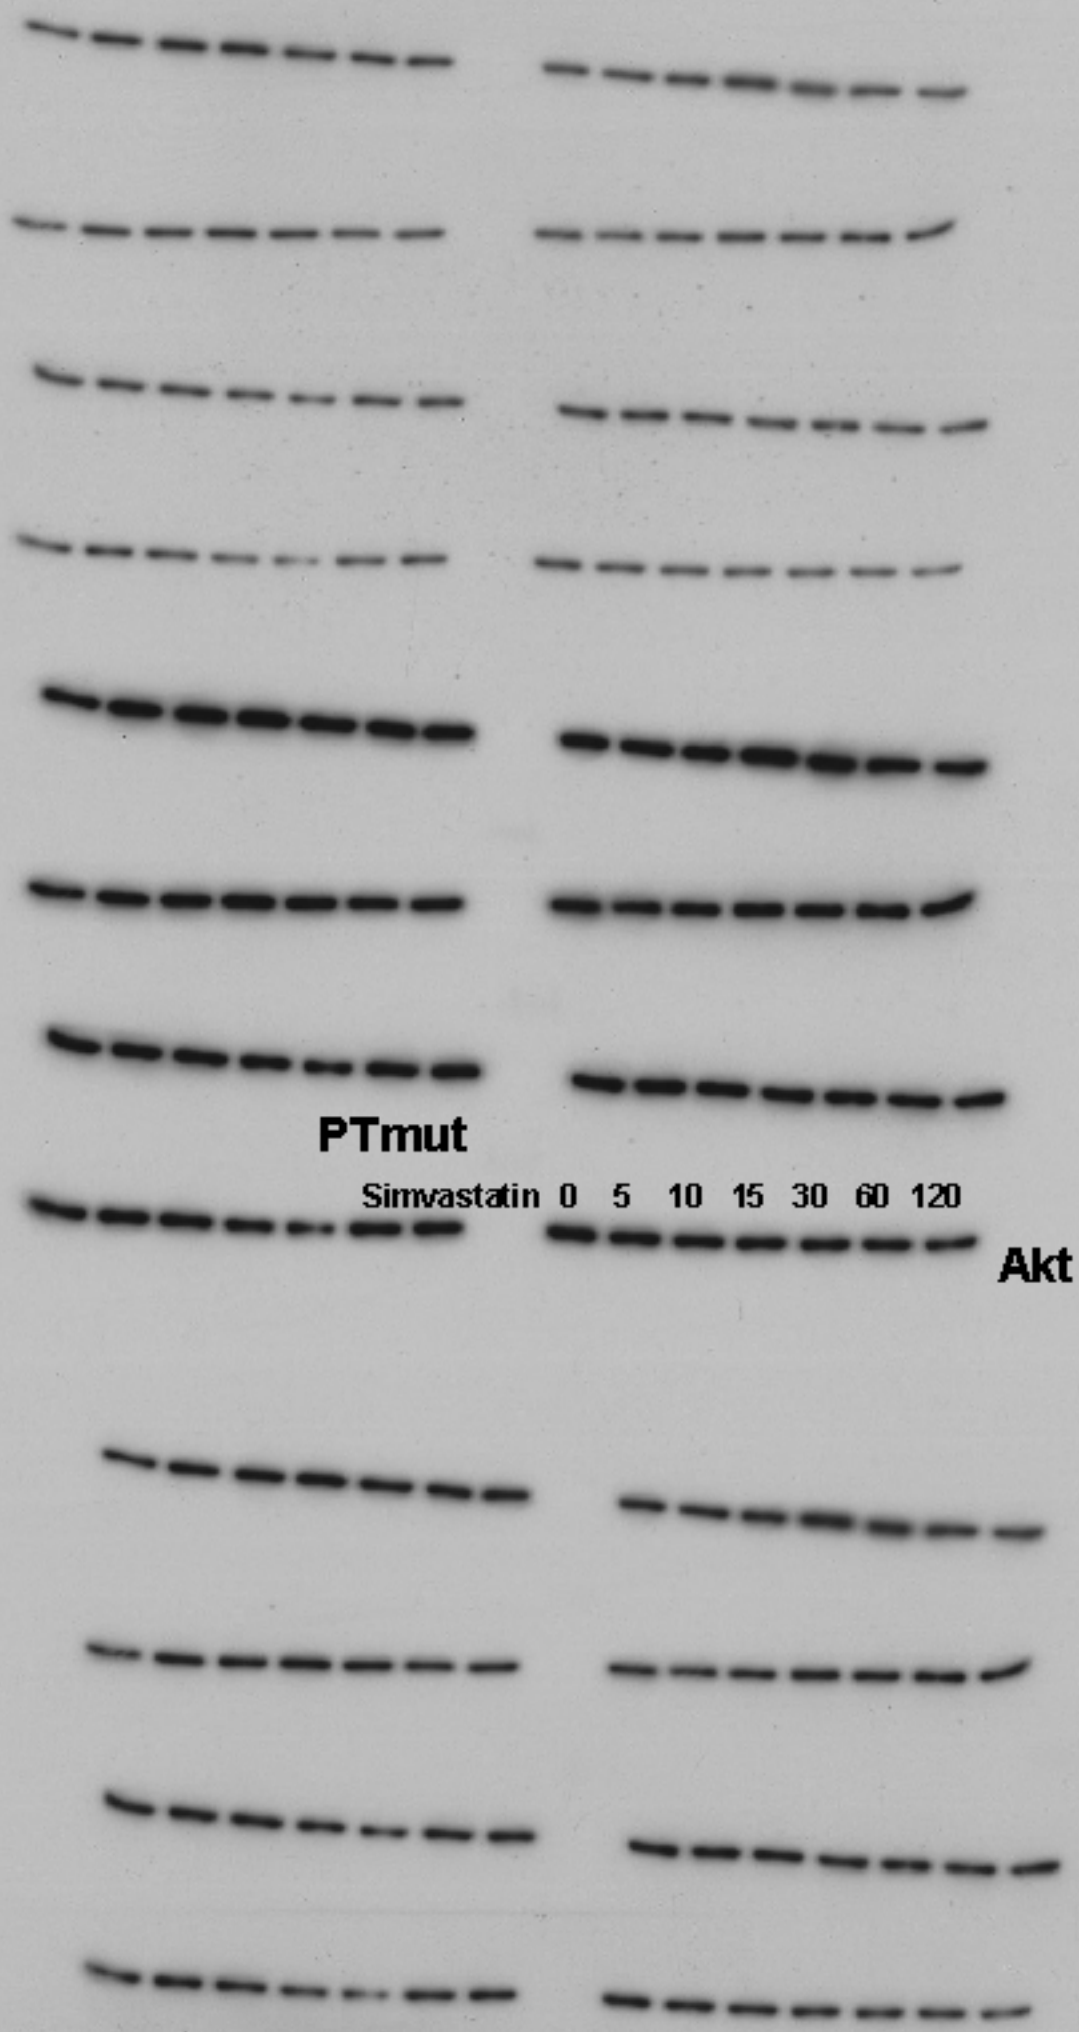

**PTmut**

Simvastatin 0 5 10 15 30 60 120

**Akt**

Simvastatin 0 5 10 15 30 60 120

N-ter

p-Akt

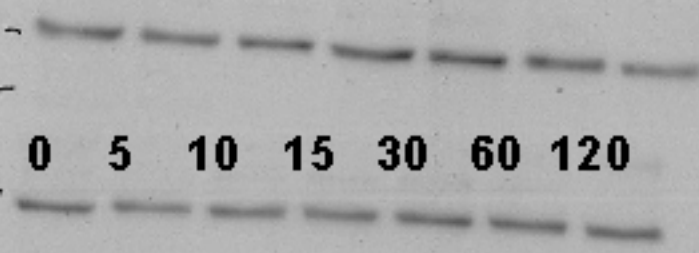

Simvastatin 0 5 10 15 30 60 120

N-ter

Akt

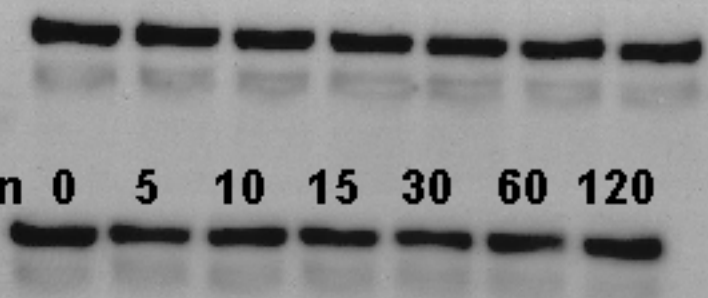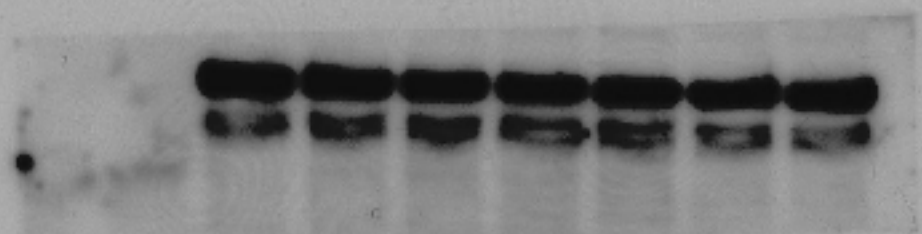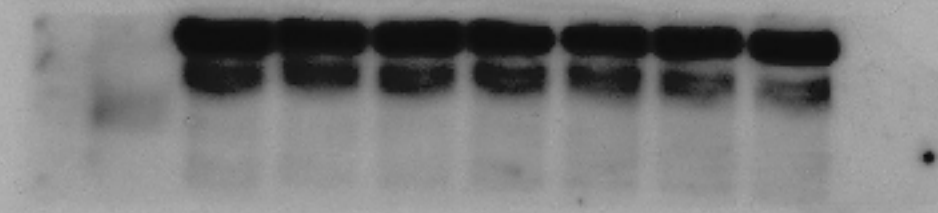

Western blot showing protein levels in the third row of the experiment. The bands are consistent in intensity across all time points, indicating no significant change in protein levels.

Western blot showing protein levels in the fourth row of the experiment. The bands are consistent in intensity across all time points, indicating no significant change in protein levels.

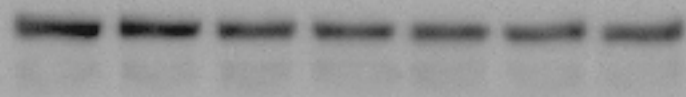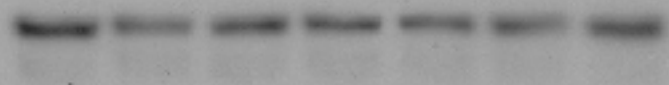

Simvastatin 0 5 10 15 30 60 120

p-AMPK

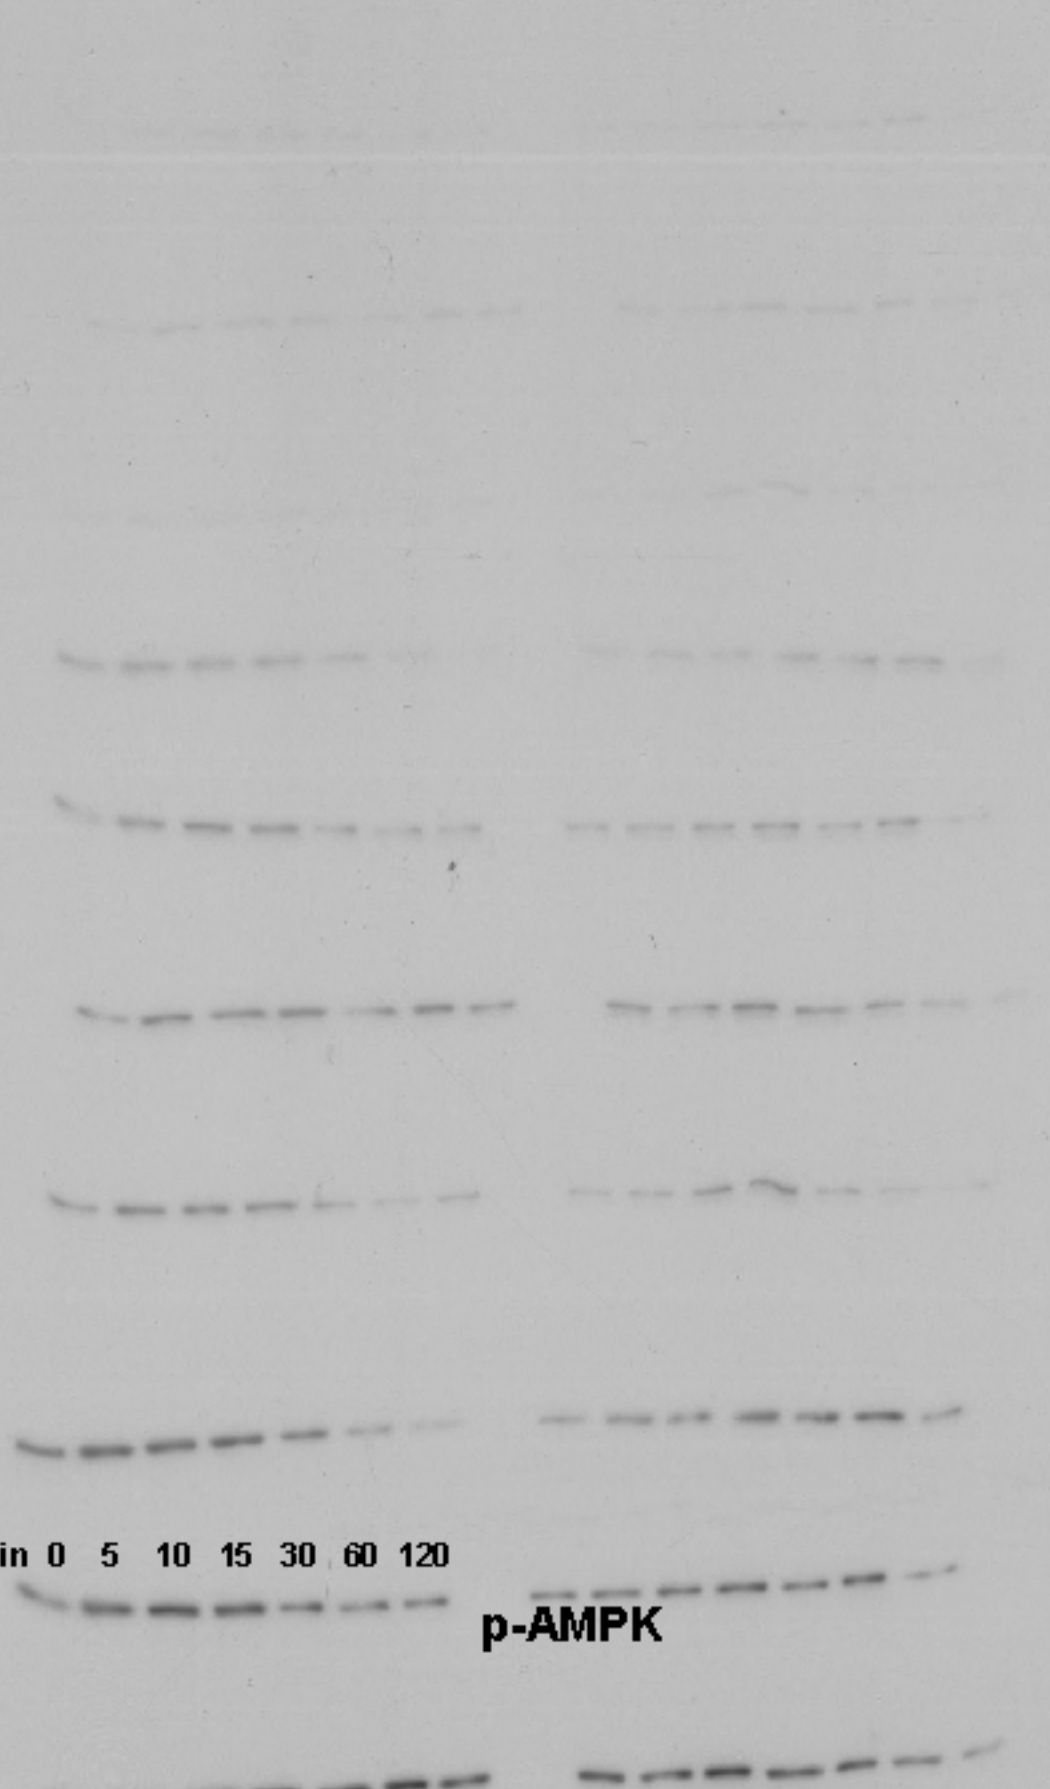

The image shows a Western blot with 14 lanes. The first lane is the 0 time point. The next seven lanes (5, 10, 15, 30, 60, 120) represent the time course of Simvastatin treatment. The final lane is a control. The p-AMPK bands are visible in all lanes, with a noticeable increase in intensity in the 5, 10, 15, and 30-minute treatment groups compared to the 0 time point and the control lane. The intensity appears to decrease slightly at 60 and 120 minutes but remains higher than the 0 time point.

Simvastatin 0 5 10 15 30 60 120

AMPK

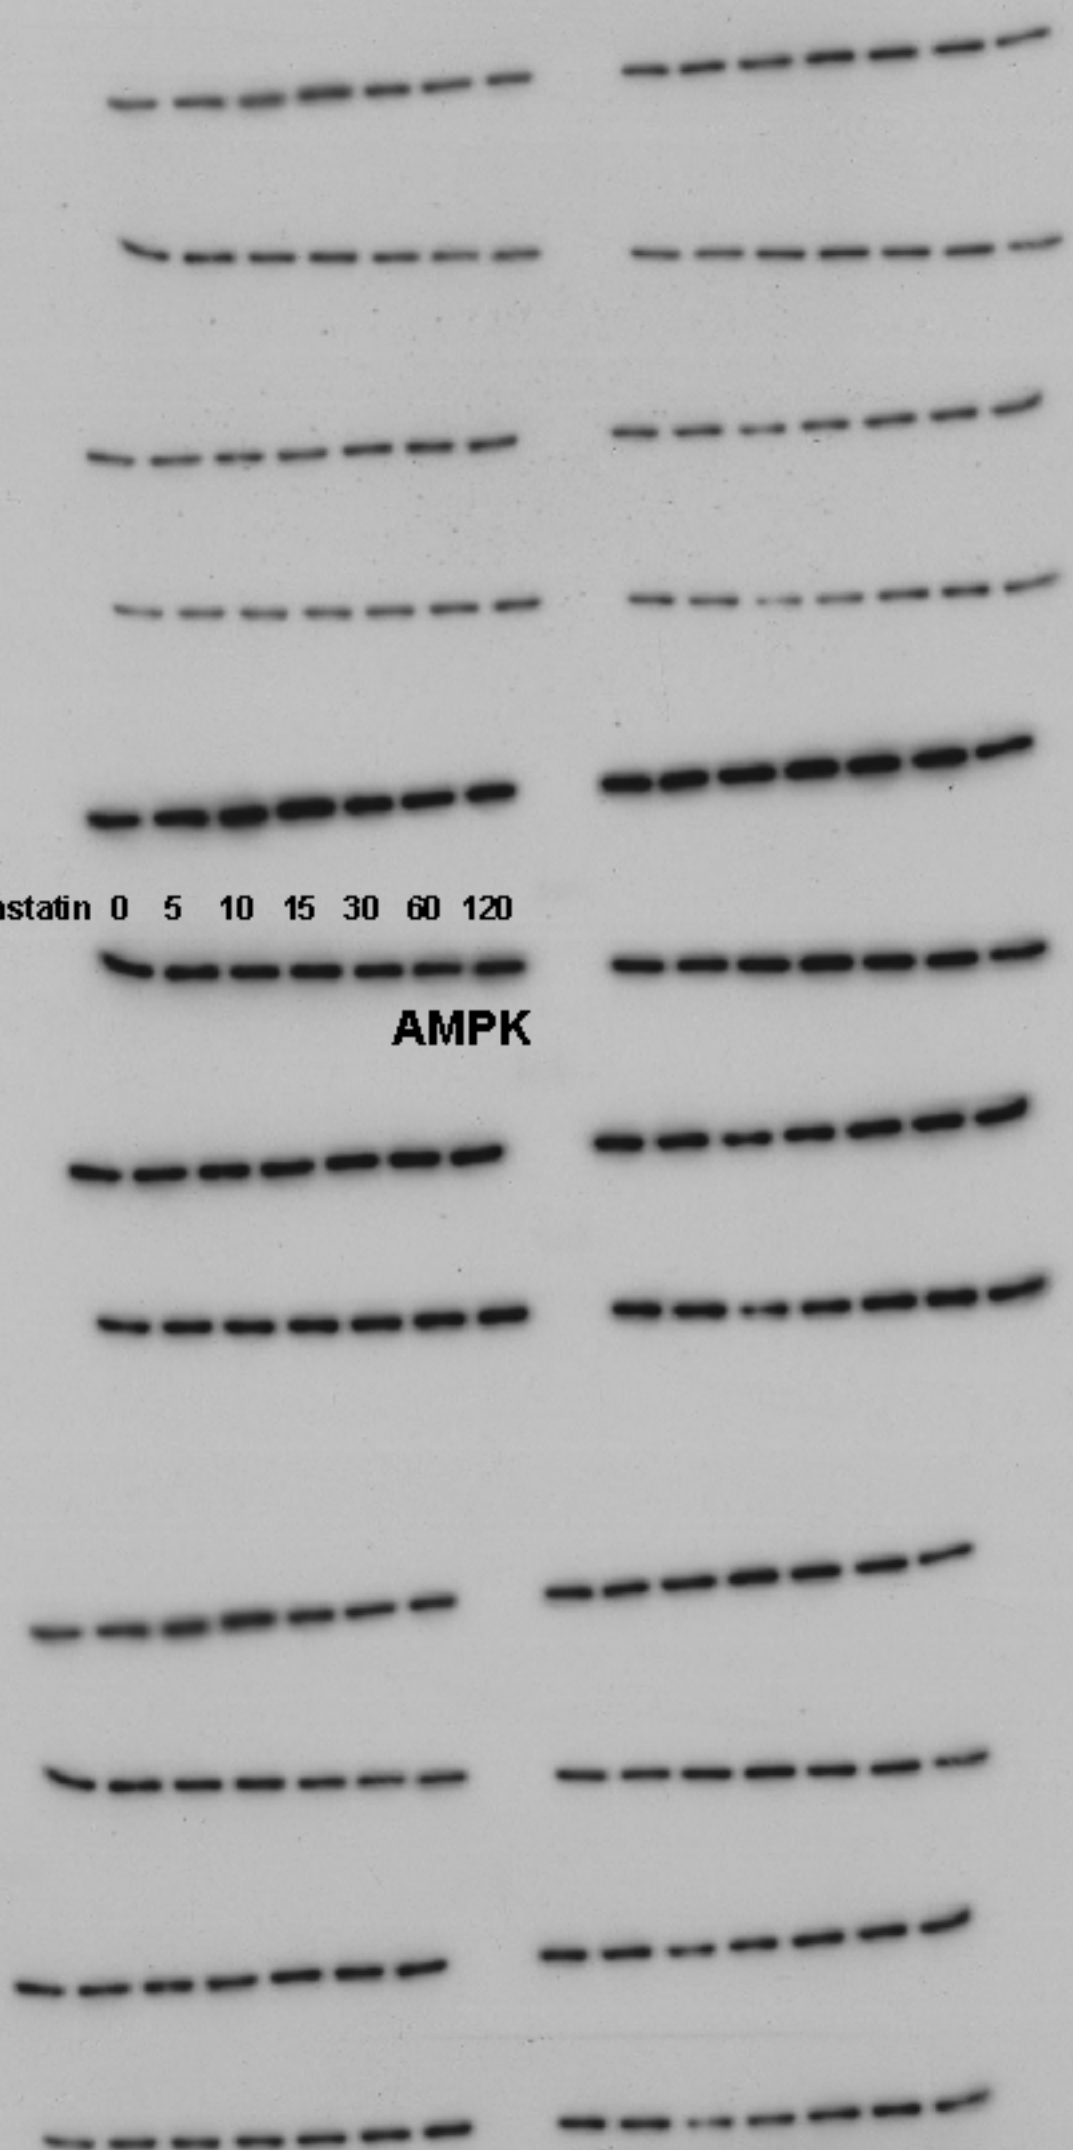

**PTmut**

Simvastatin 0 5 10 15 30 60 120

**p-AMPK**

**AFC**

Simvastatin 0 5 10 15 30 60 120

**p-AMPK**

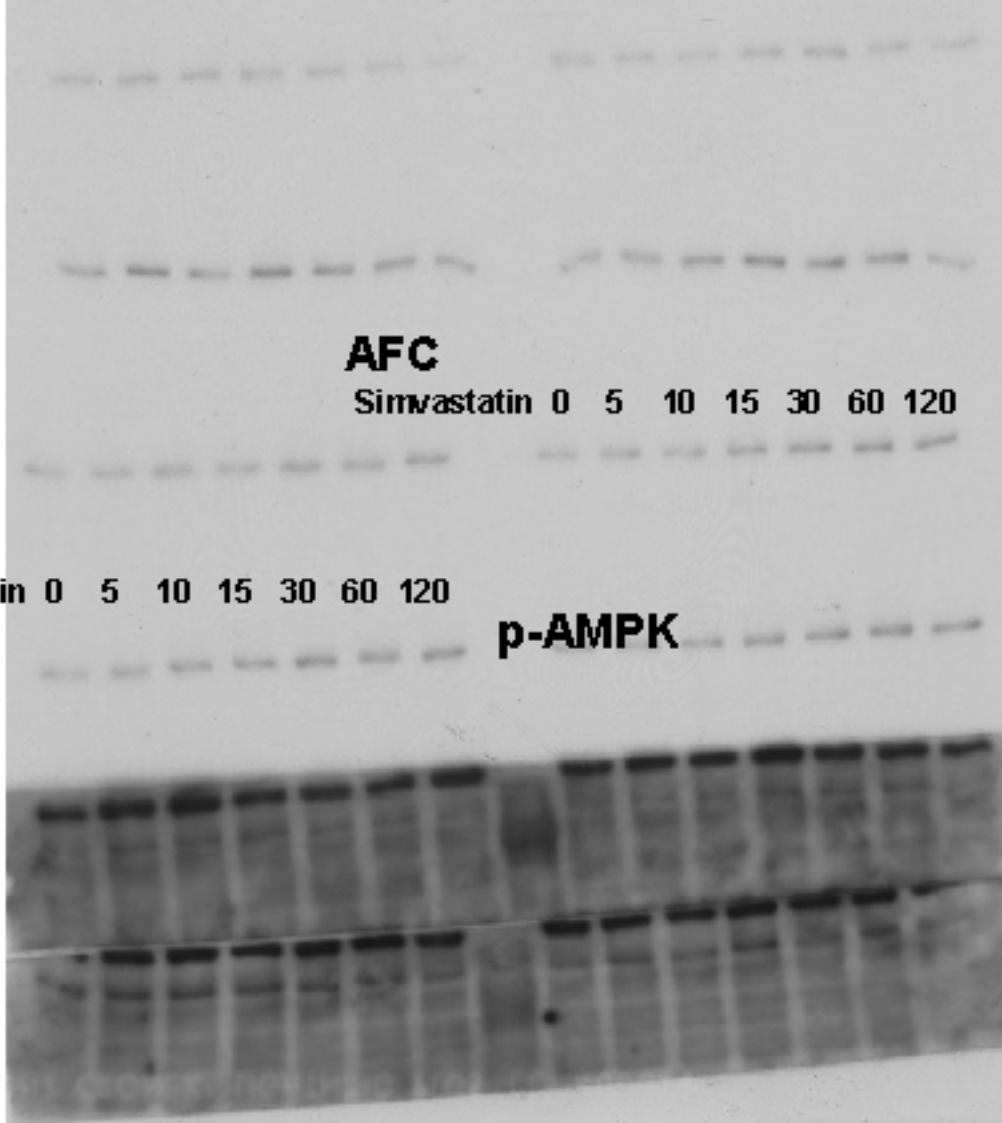



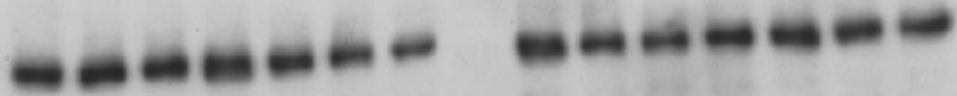

**AFC**

Simvastatin 0 5 10 15 30 60 120

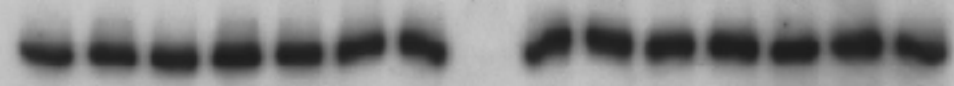

**AMPK**

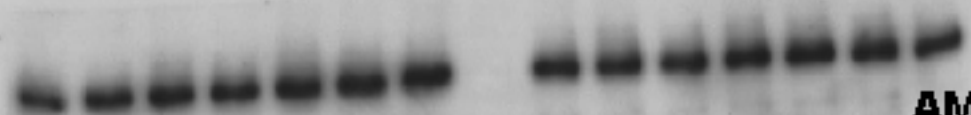

**PTmut**

Simvastatin 0 5 10 15 30 60 120

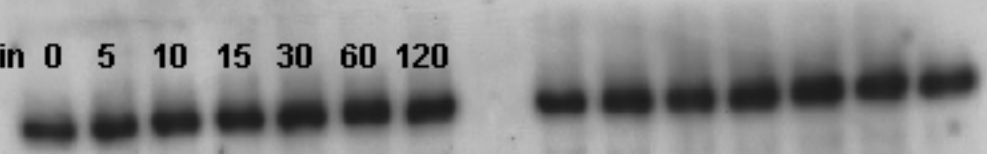

**AMPK**

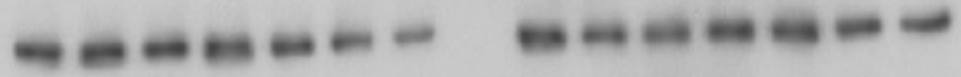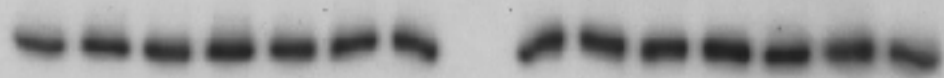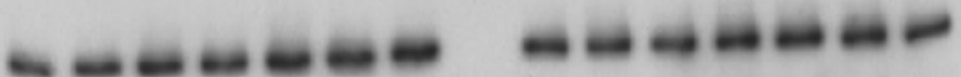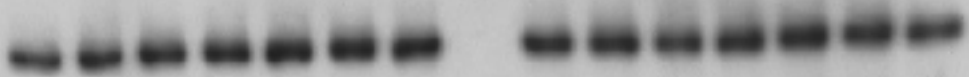

AUDA

Etnot

AFC

pe mt

AUAZ

Etnot 2

p-AMPK

Simvastatin 0 5 10 15 30 60 120

Spina

p-AMPK

Vector

C-ter

0 5 10 15 30 60 120



**Vector**

Simvastatin 0 5 10 15 30 60 120

**AMPK**

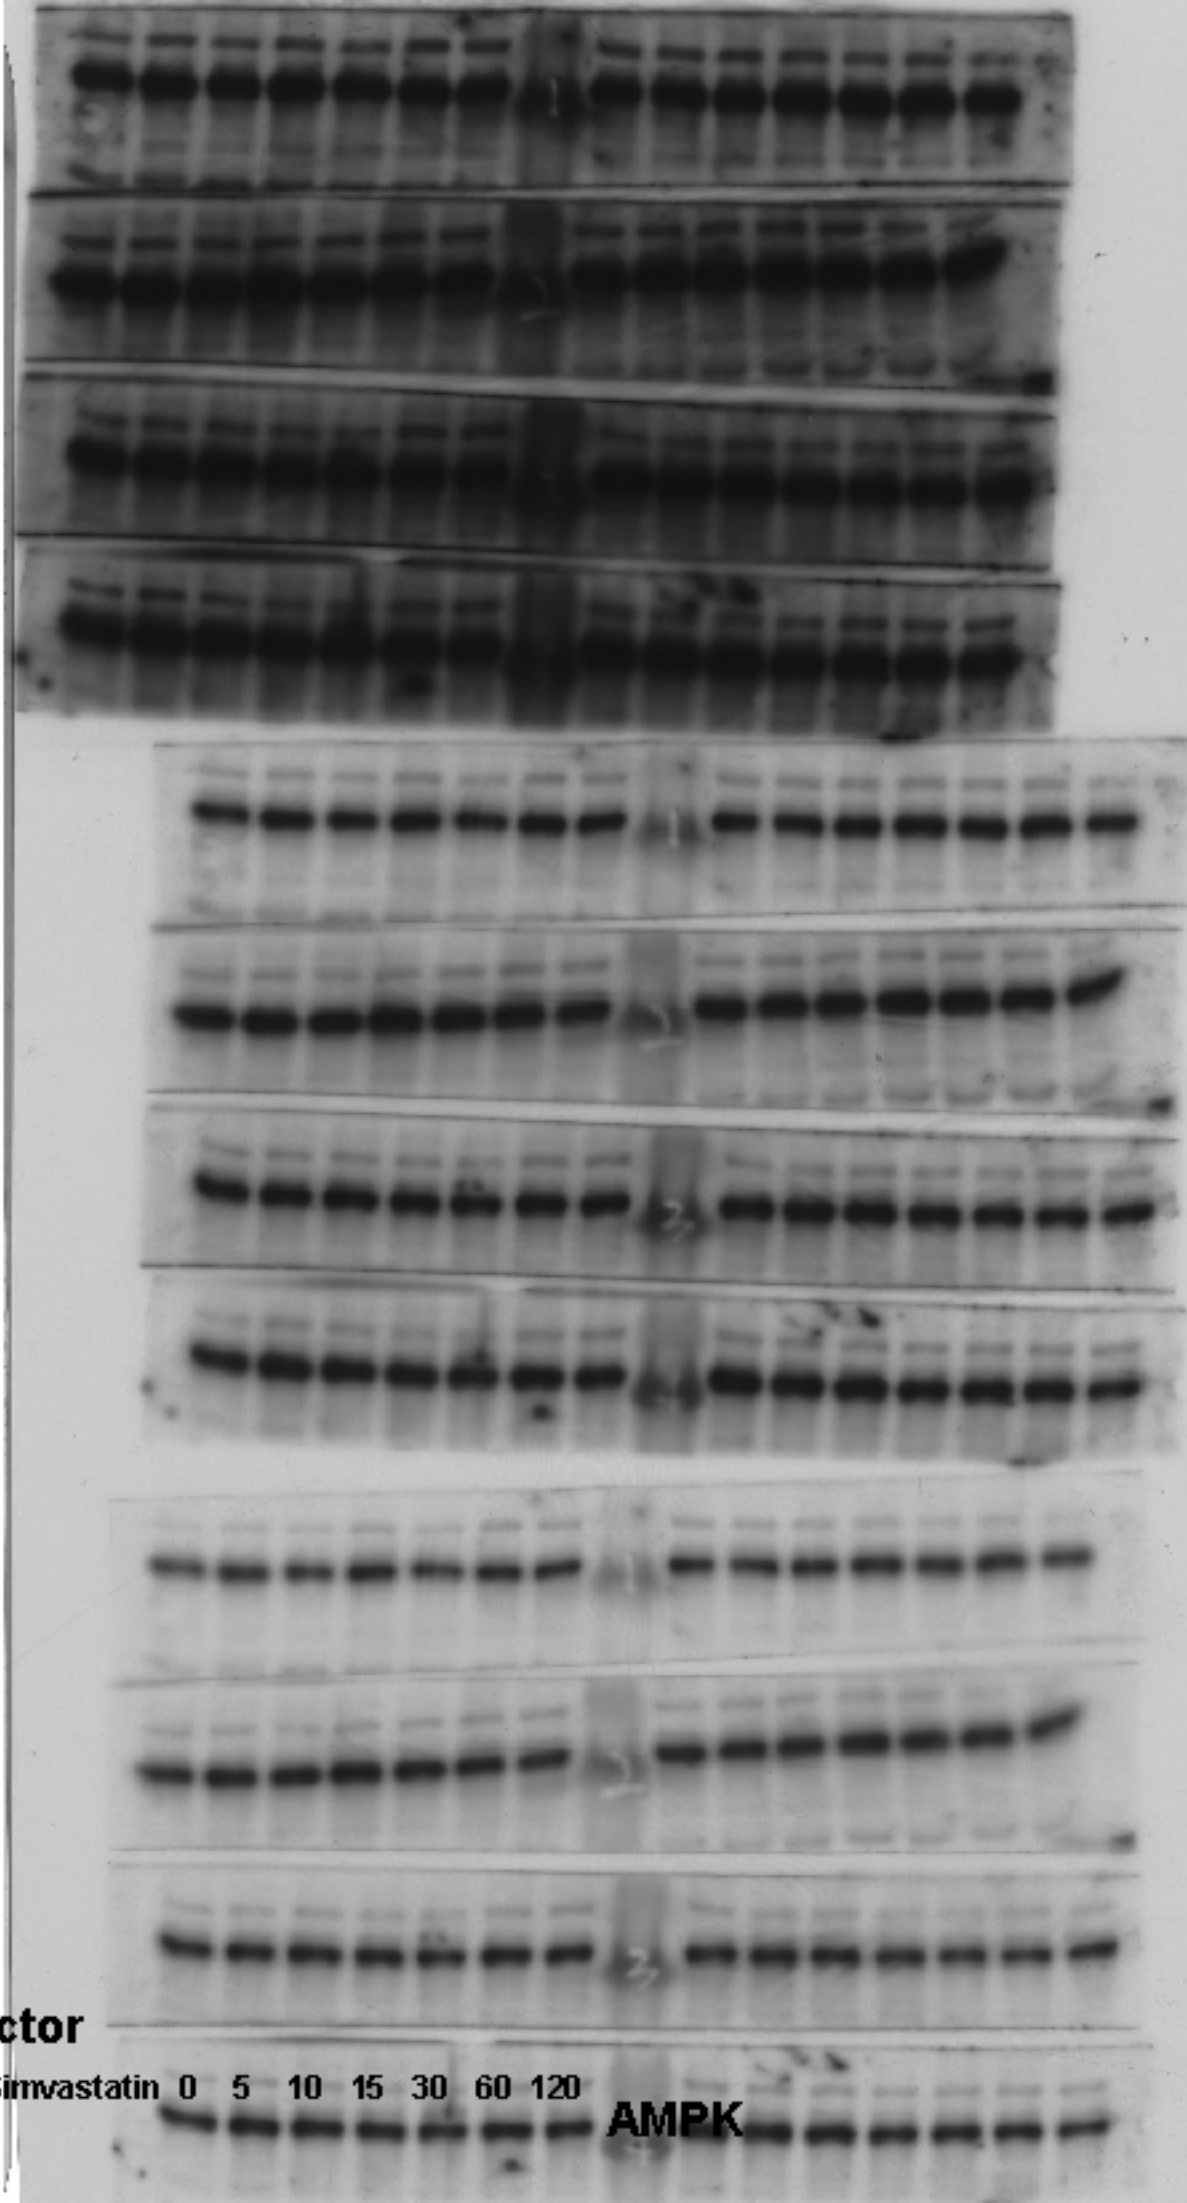

**PTmut**

Simvastatin 0 5 10 15 30 60 120

**p-AMPK**

**AFC**

Simvastatin 0 5 10 15 30 60 120

**p-AMPK**





**AFC**

Simvastatin 0 5 10 15 30 60 120

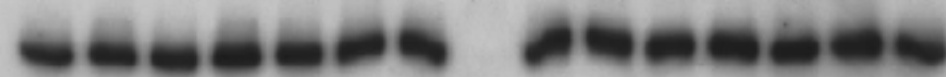

**AMPK**

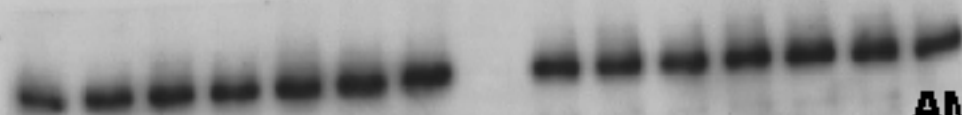

**PTmut**

Simvastatin 0 5 10 15 30 60 120

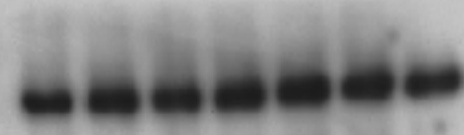

**AMPK**

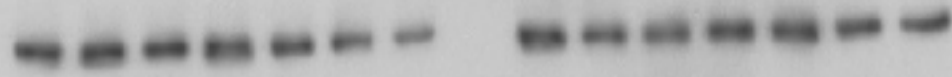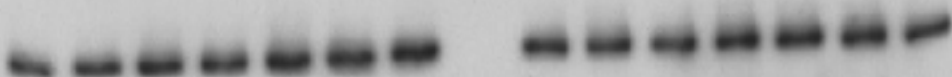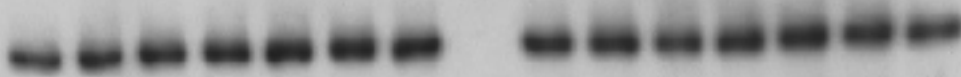

Simvastatin 0 5 10 15 30 60 120

N-ter

p-AMPK

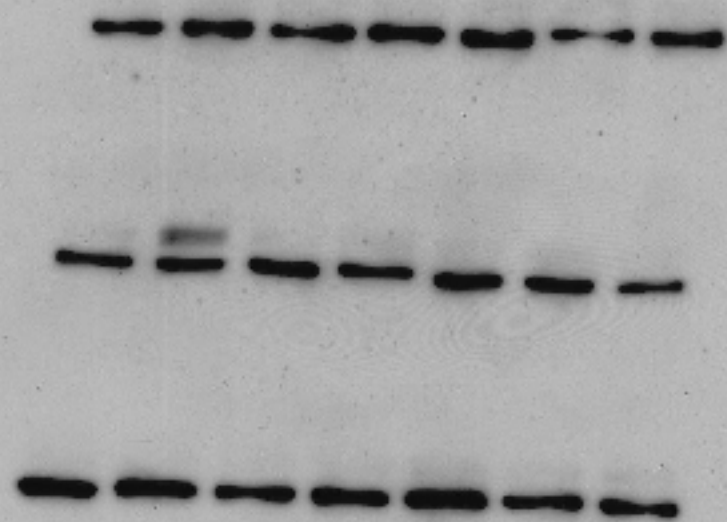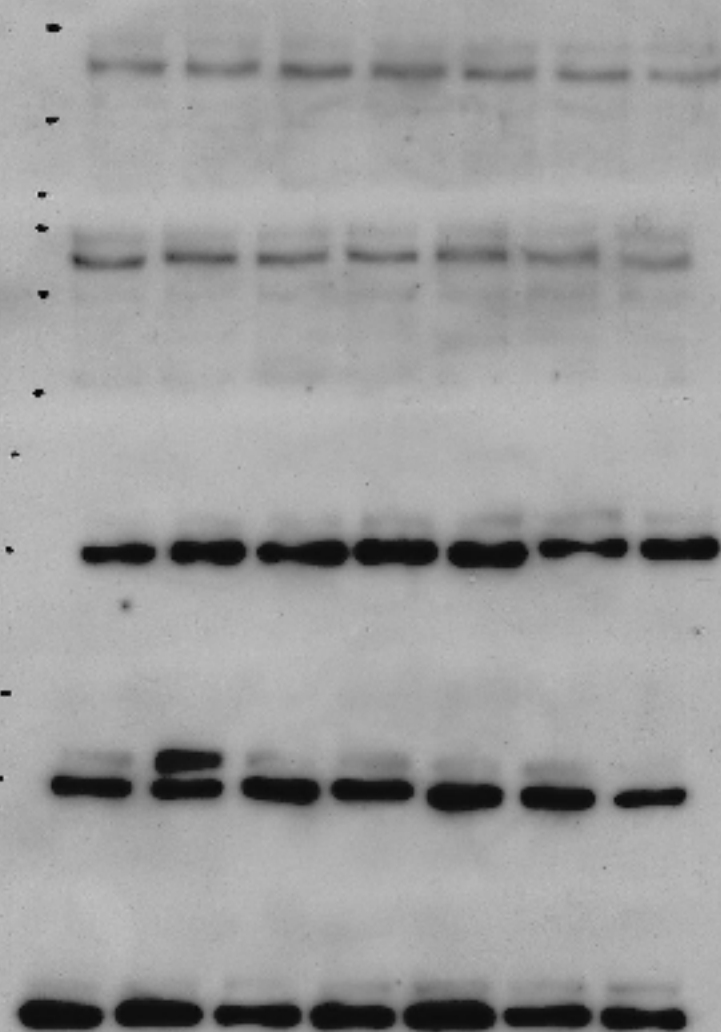

**Fig S5. Simvastatin promotes the formation of an sEH-eNOS-Akt-AMPK complex.**

Simvastatin 0 5 10 15 30 60 120

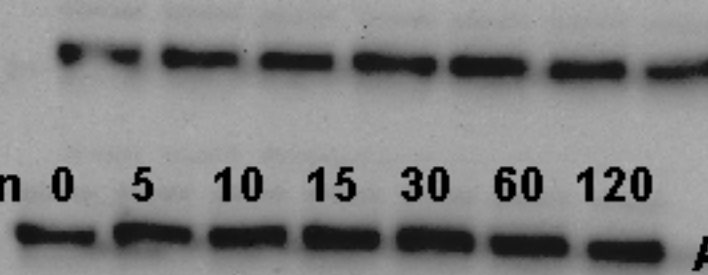

AMPK  
N-ter

Simvastatin 0 7.5 15 30 60 120

IP:sEH IP:eNOS

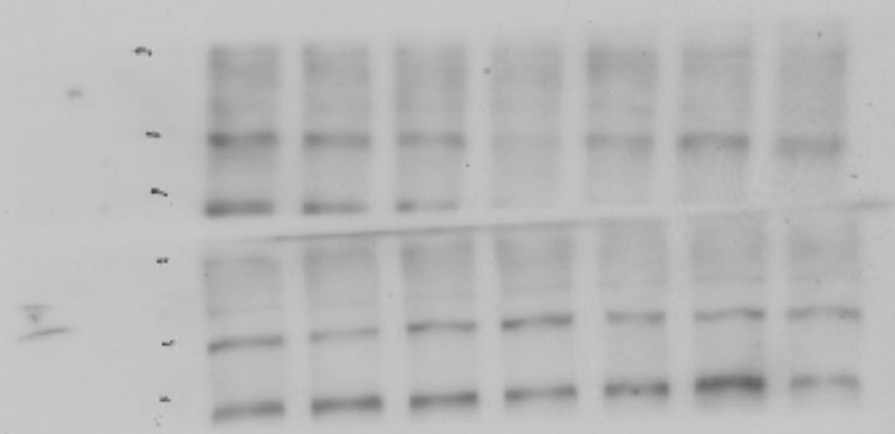



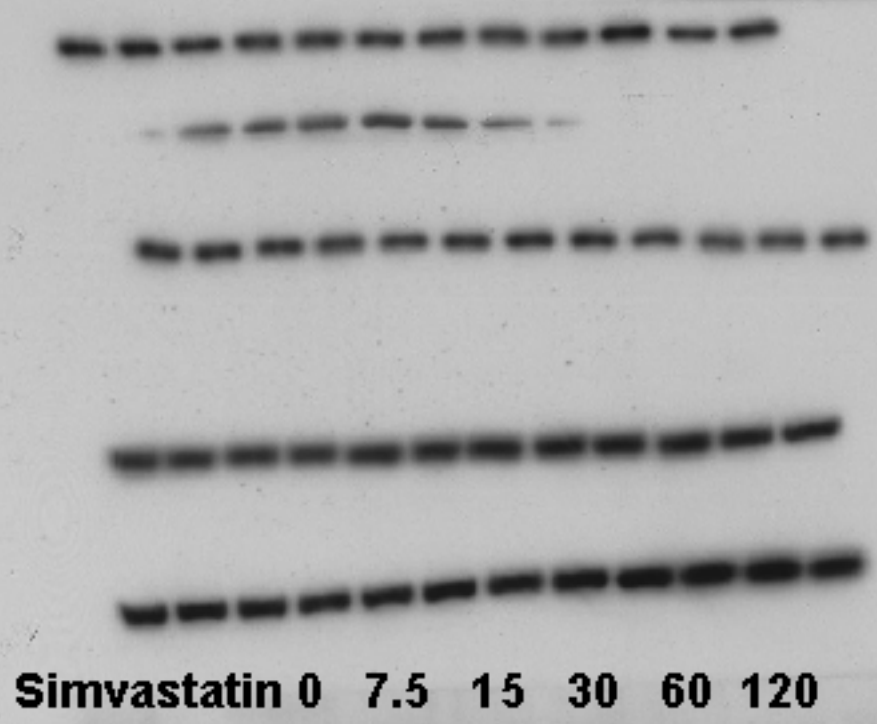

] tub  
 (α-tub)  
 ] tub

Simvastatin 0 7.5 15 30 60 120

IP: sEH<sup>EM</sup> IP: sEH  
 UB sEH

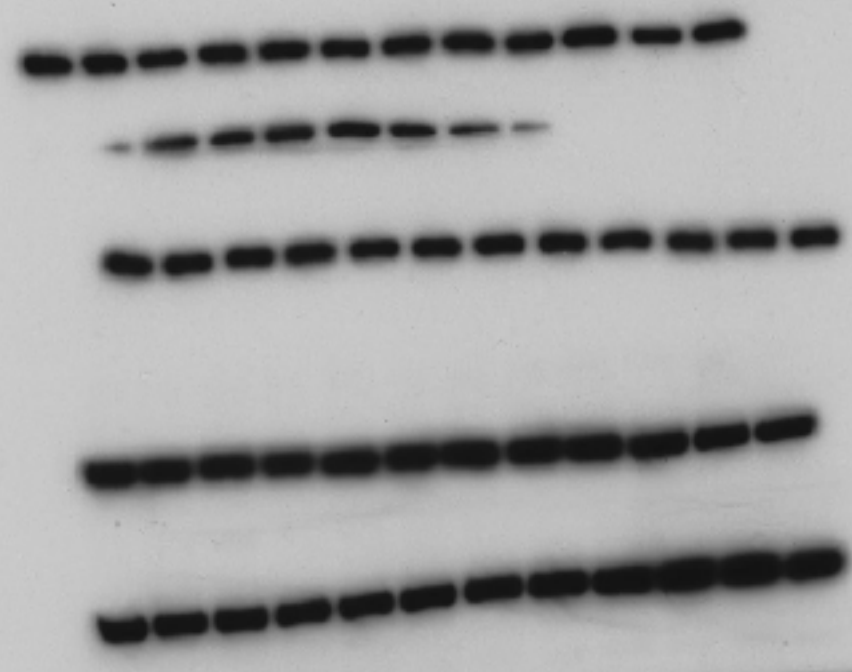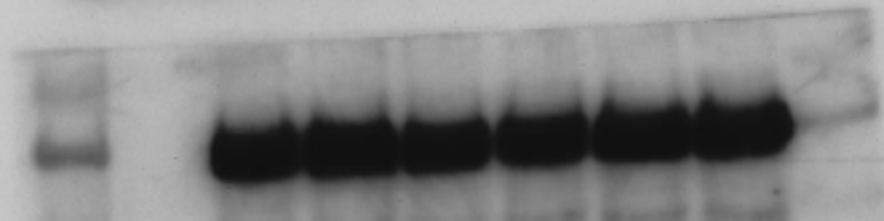

Simvastatin 0 7.5 15 30 60 120

IP:sEH IP:Akt

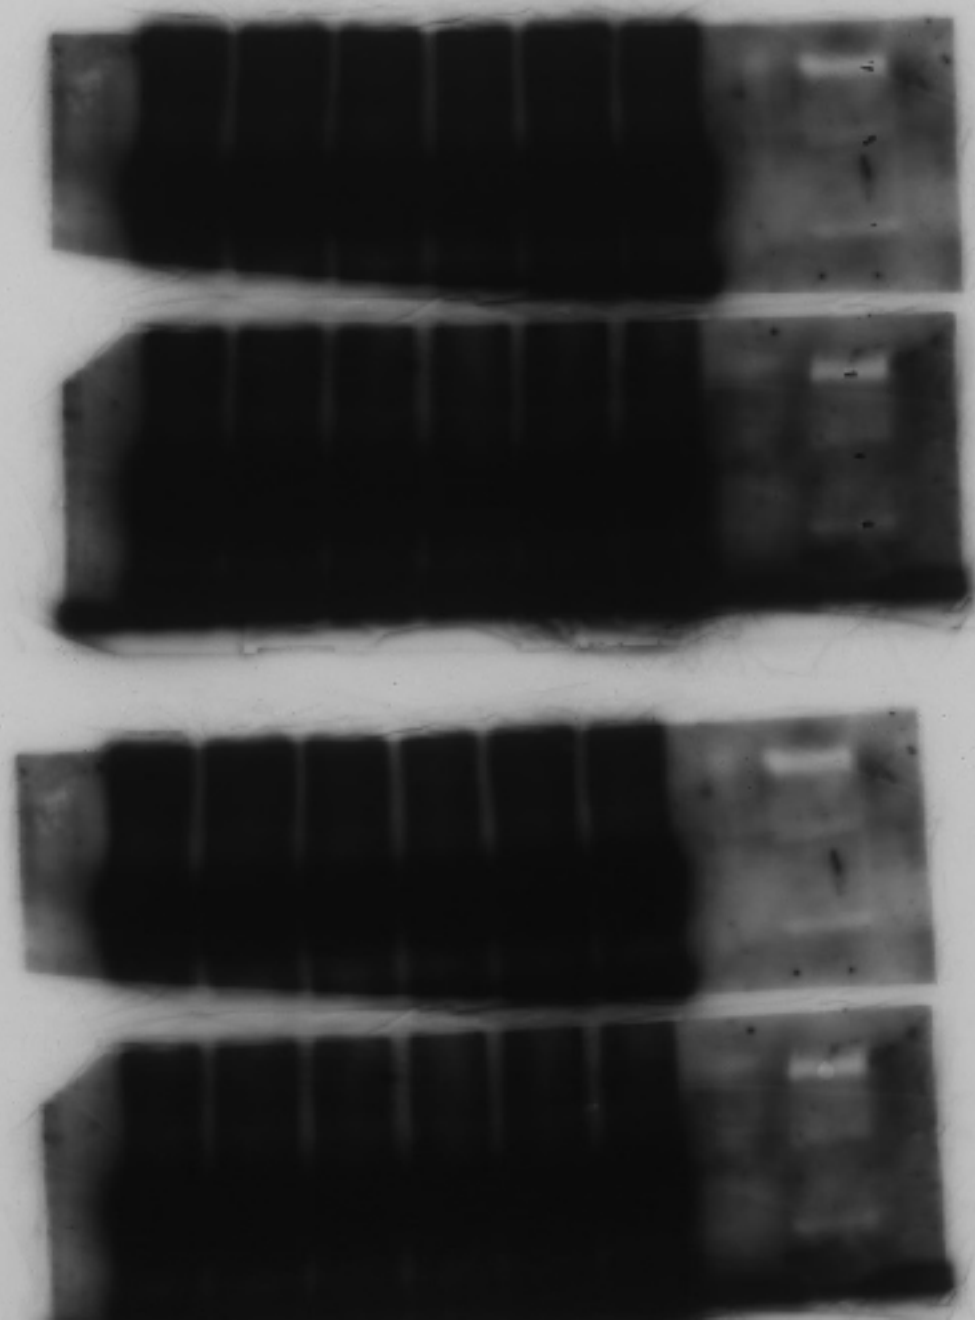

\*\*\* Y131A2 ILU9\*\*\*

\*\*\* Y131A2 ILU9\*\*\*

\*\*

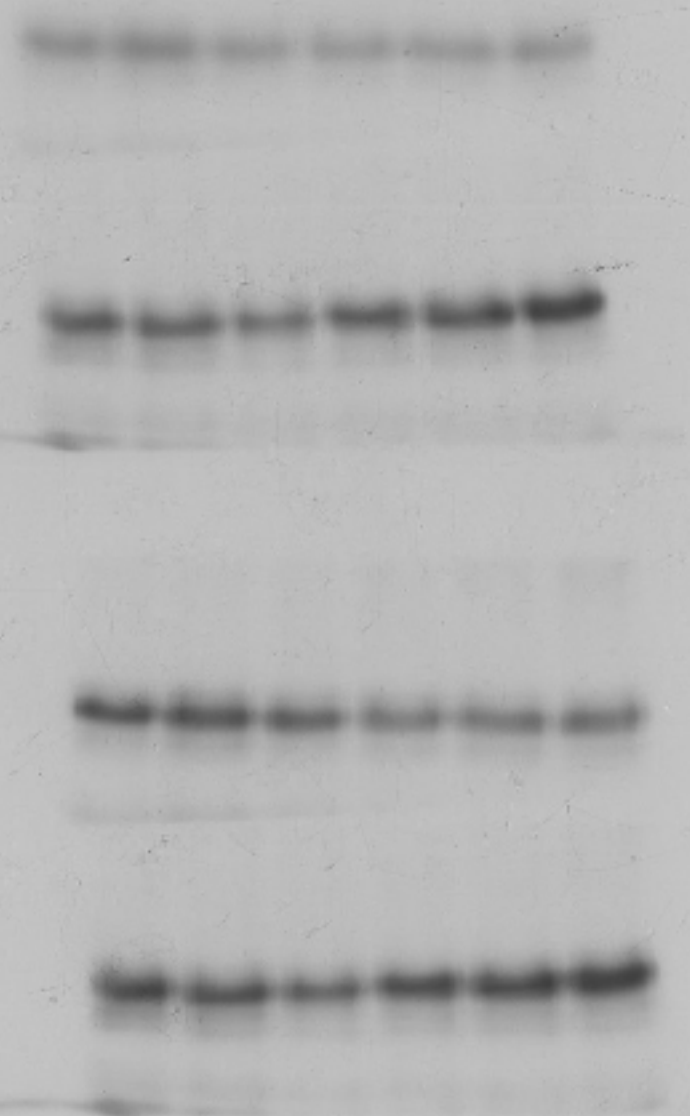

**Simvastatin 0 7.5 15 30 60 120**

**IP:sEH IP:sEH**

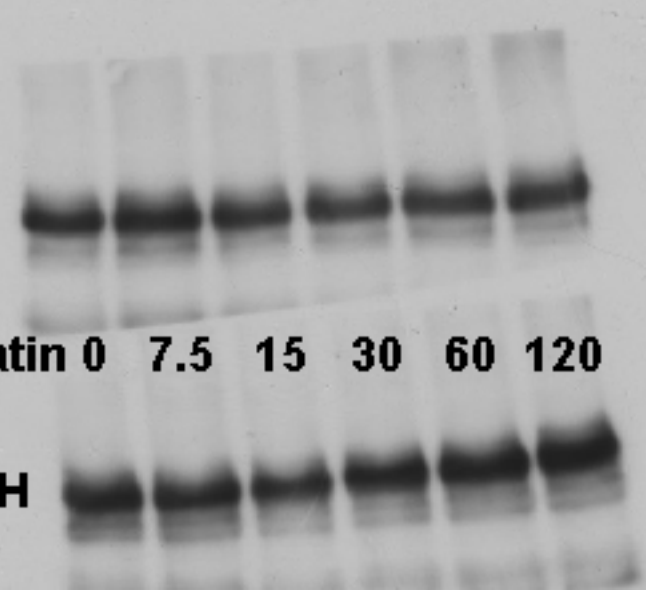

...FUJISAFETY...

Simvastatin 0 7.5 15 30 60 120

IP:sEH IP:AMPK

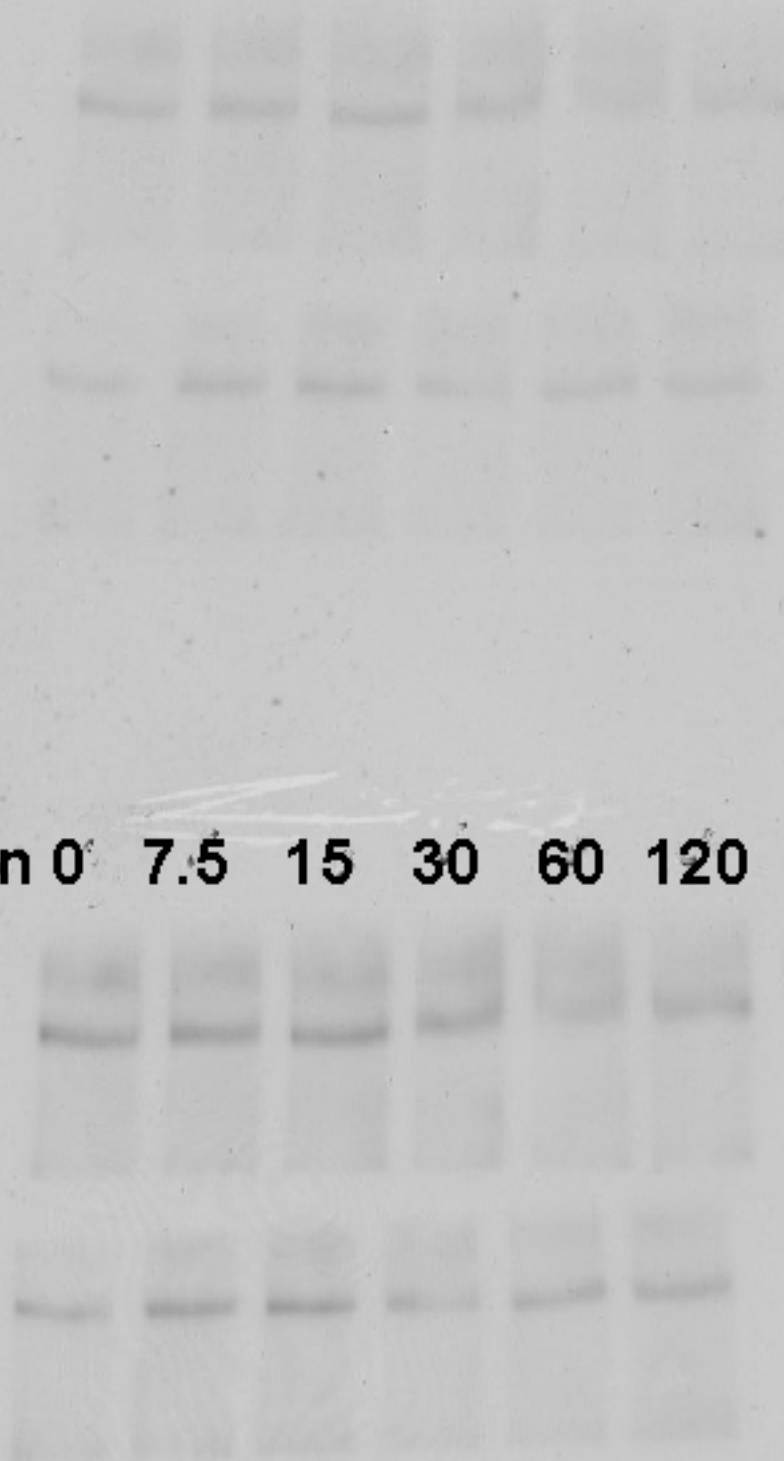

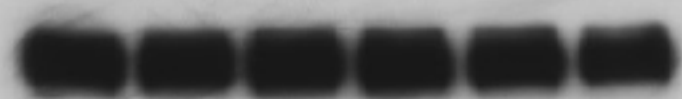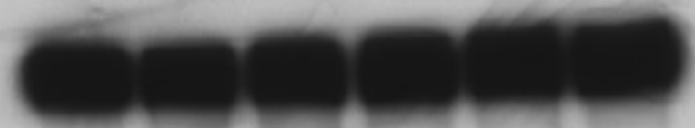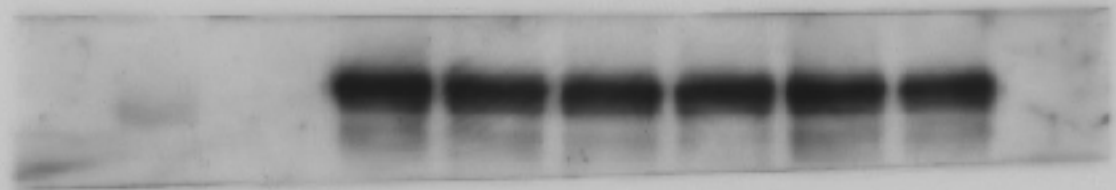

Simvastatin 0 7.5 15 30 60 120

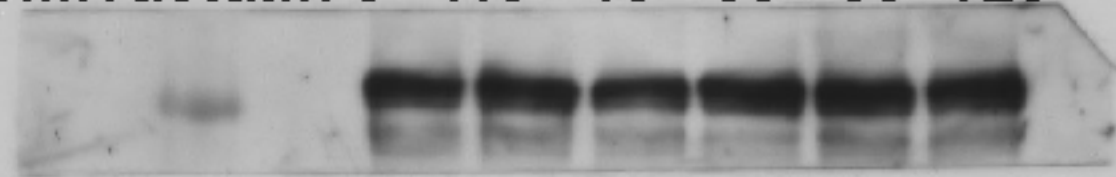

IP:sEH IP:sEH

**Fig S6. Activation of epidermal growth factor receptor (EGFR)–c-Src signaling is required for simvastatin-induced increase in sEH phosphatase activity.**

Simvastatin 0 5 10 15 30 60 120

pEGFR

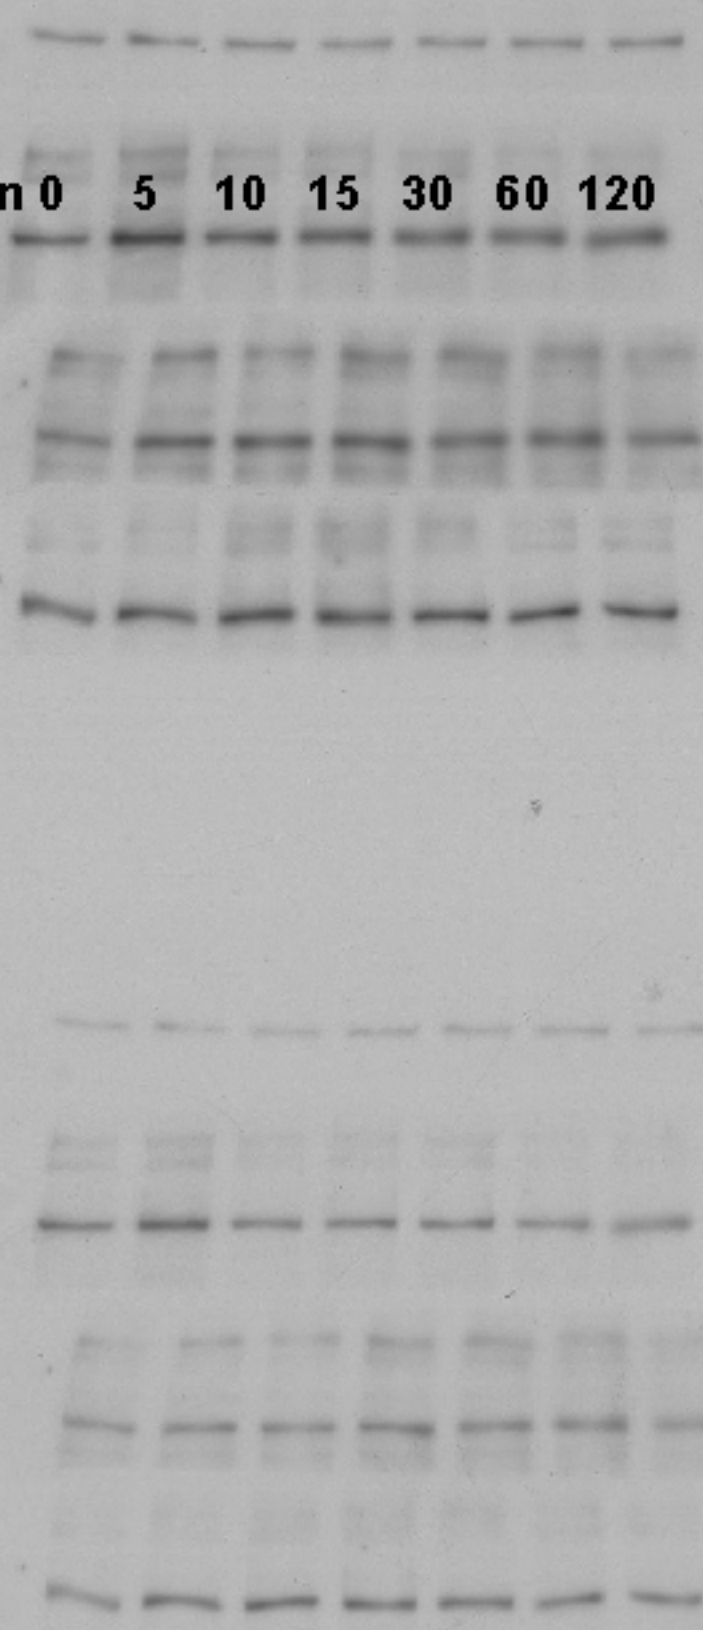



Simvastatin 0 5 10 15 30 60 120

EGFR

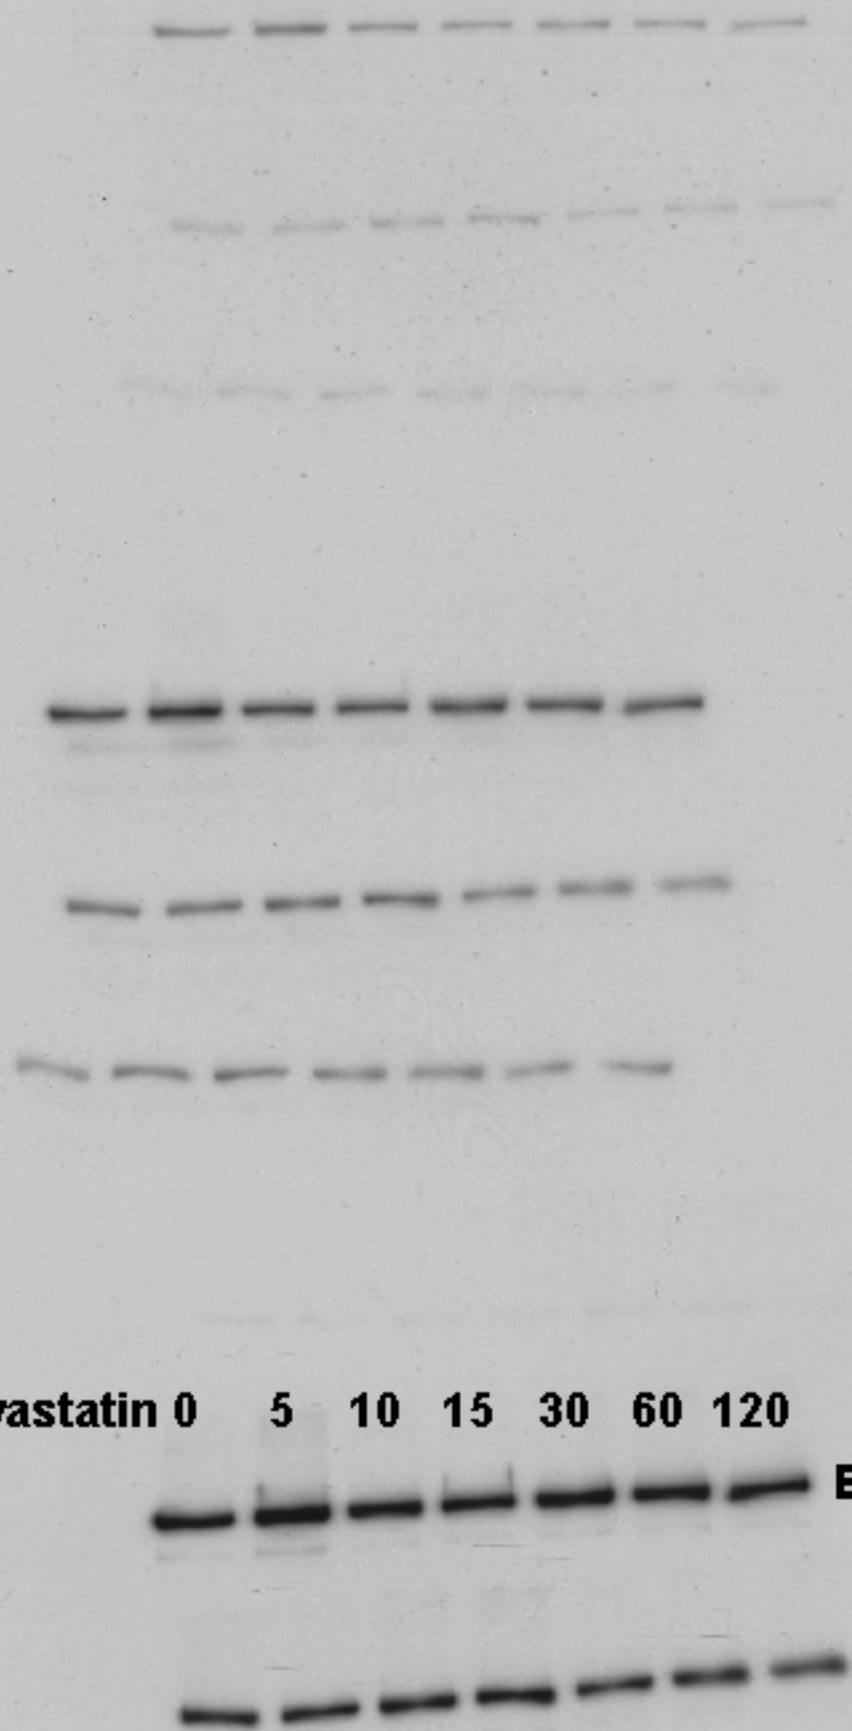

Simvastatin 0 5 10 15 30 60 120

p-Src

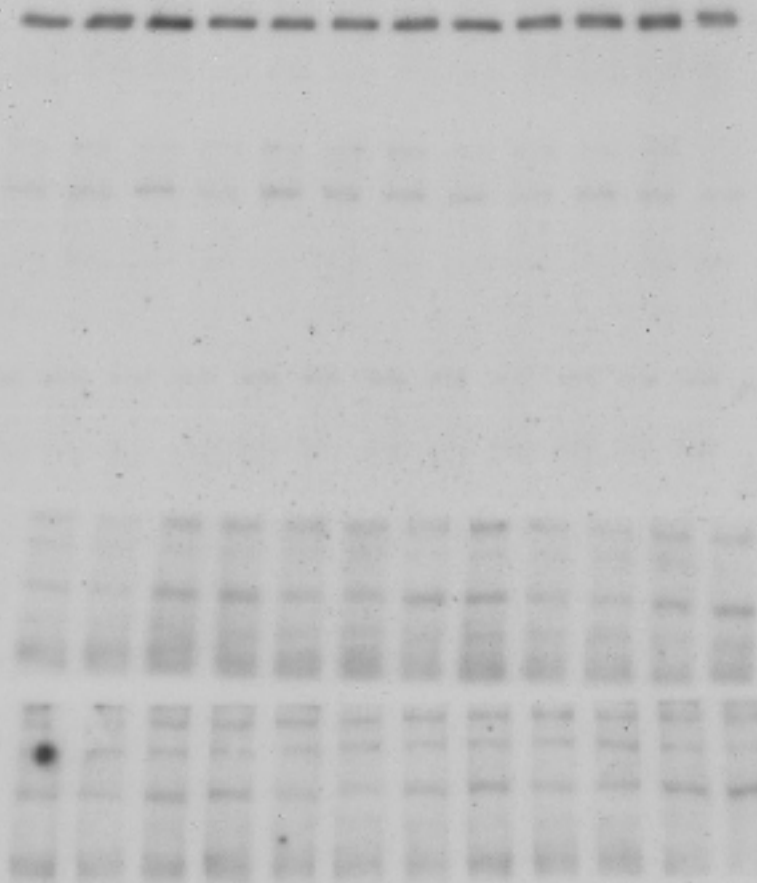

...YTRRAA2 ILUQA...

...YTRRAA2 ILUQA...

...YTRRAA2 ILUQA...



Simvastatin 0 5 10 15 30 60 120

p-Src

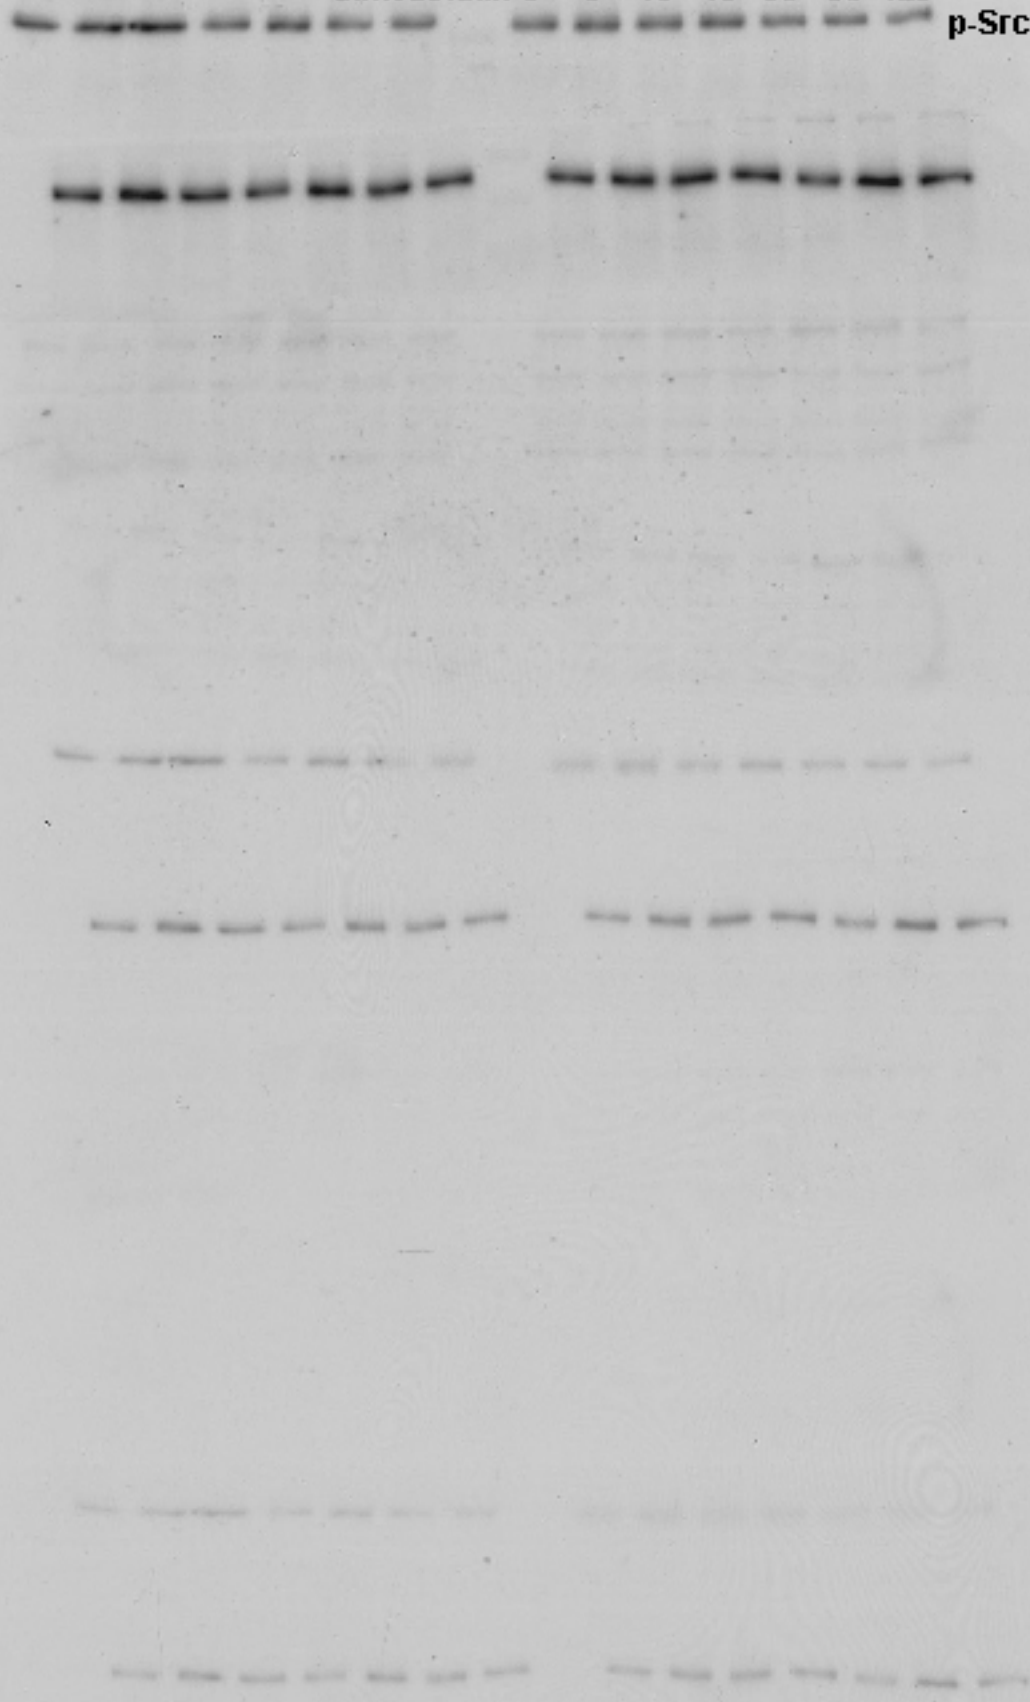

...FUJI SAFETY...

...FUJI SAFETY...

...FUJI SAFETY...

Simvastatin 0 5 10 15 30 60 120

Src

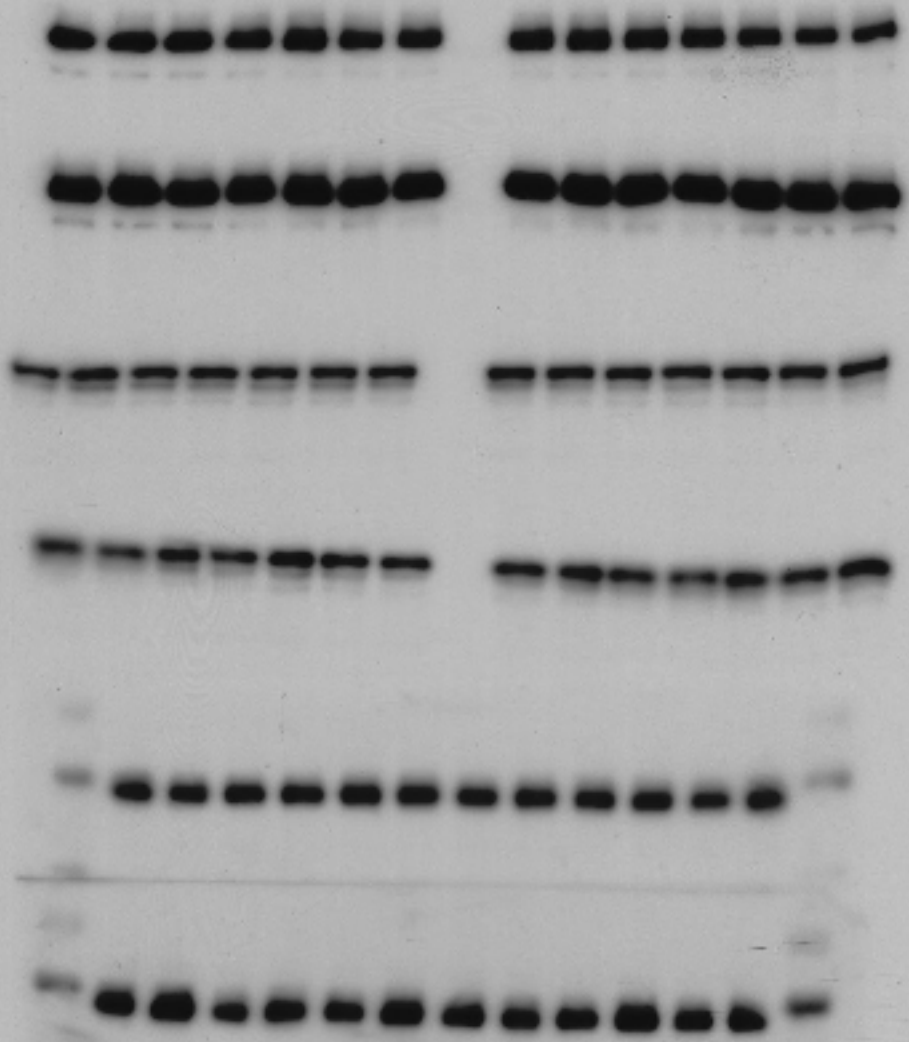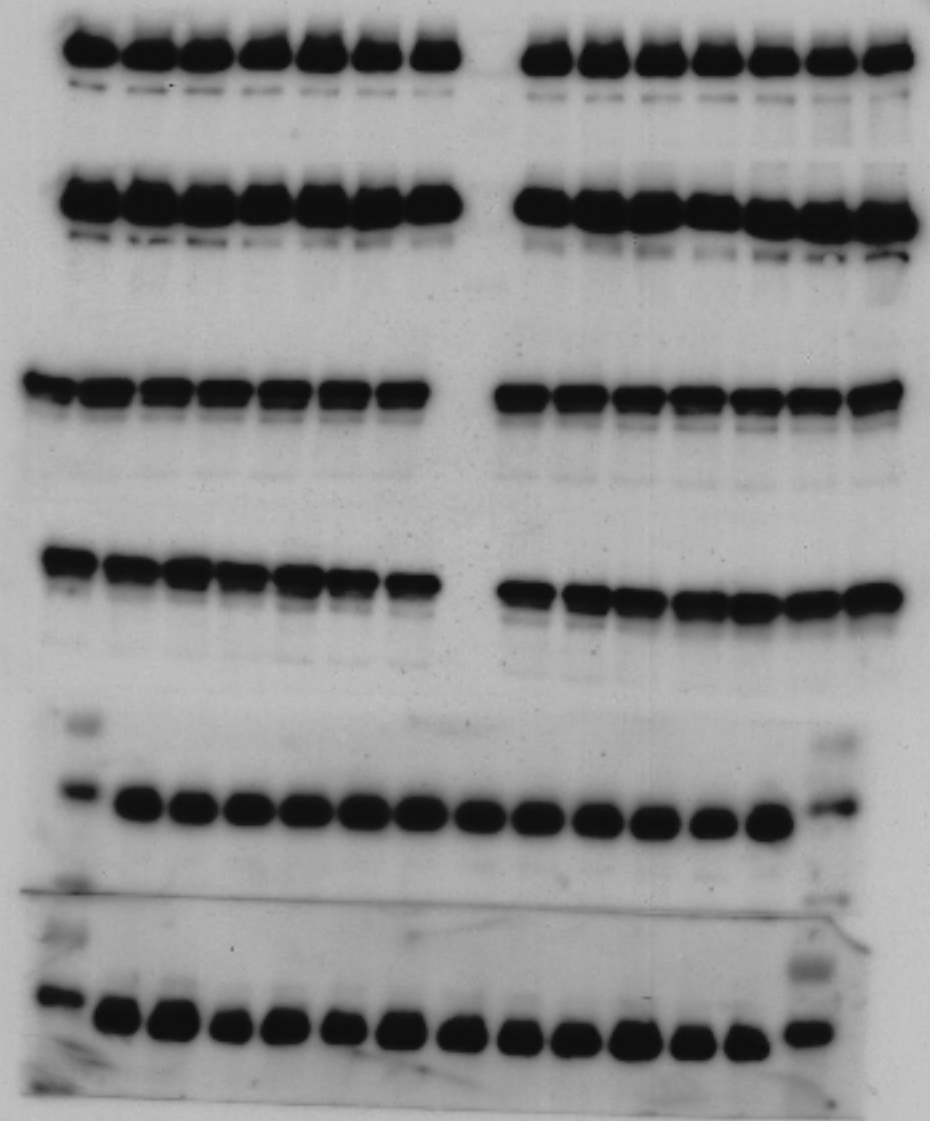

**Fig S7. Simvastatin induces tyrosine phosphorylation of sEH.**

Simvastatin 0 5 10 15 30 60 120

pEGFR





Simvastatin 0 5 10 15 30 60 120

EGFR



Simvastatin 0 5 10 15 30 60 120

p-Src

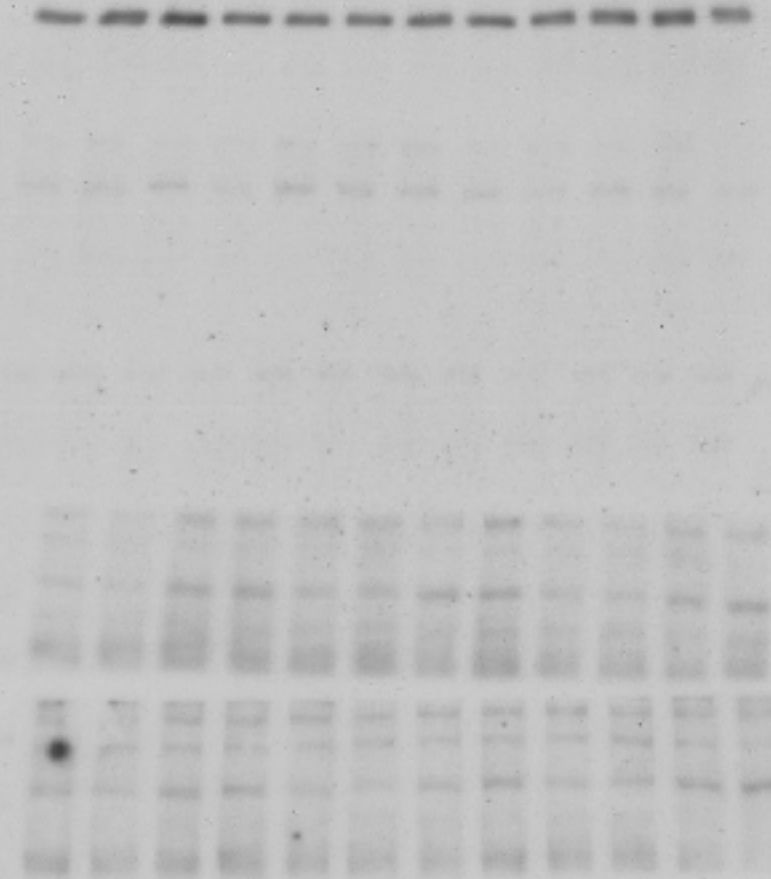

...YTRRAA2 ILUQA...

...YTRRAA2 ILUQA...

...YTRRAA2 ILUQA...

Simvastatin 0 5 10 15 30 60 120

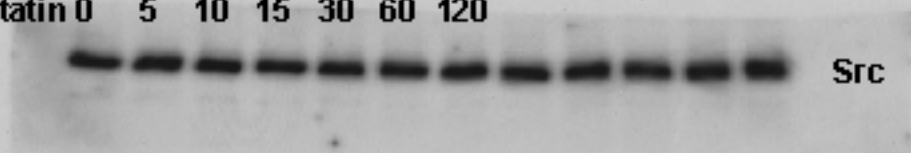

Src

Simvastatin 0 5 10 15 30 60 120

p-Src



...FUJI SAFETY...

...FUJI SAFETY...

...FUJI SAFETY...

Simvastatin 0 5 10 15 30 60 120

Src



Simvastatin 0 5 10 15 30 60 120

pEGFR





Simvastatin 0 5 10 15 30 60 120

EGFR





Simvastatin 0 5 10 15 30 60 120

p-Src



...YTRRAA2 ILUQA...

...YTRRAA2 ILUQA...

...YTRRAA2 ILUQA...

Simvastatin 0 5 10 15 30 60 120



Src

Simvastatin 0 5 10 15 30 60 120

p-Src



...FUJI SAFETY...

...FUJI SAFETY...

...FUJI SAFETY...

Simvastatin 0 5 10 15 30 60 120

Src



**Fig S8. c-Src signaling is essential for simvastatin-induced sEH tyrosine phosphorylation and the formation of an sEH–Akt–AMPK–eNOS complex.**

YTHFAQIUQF

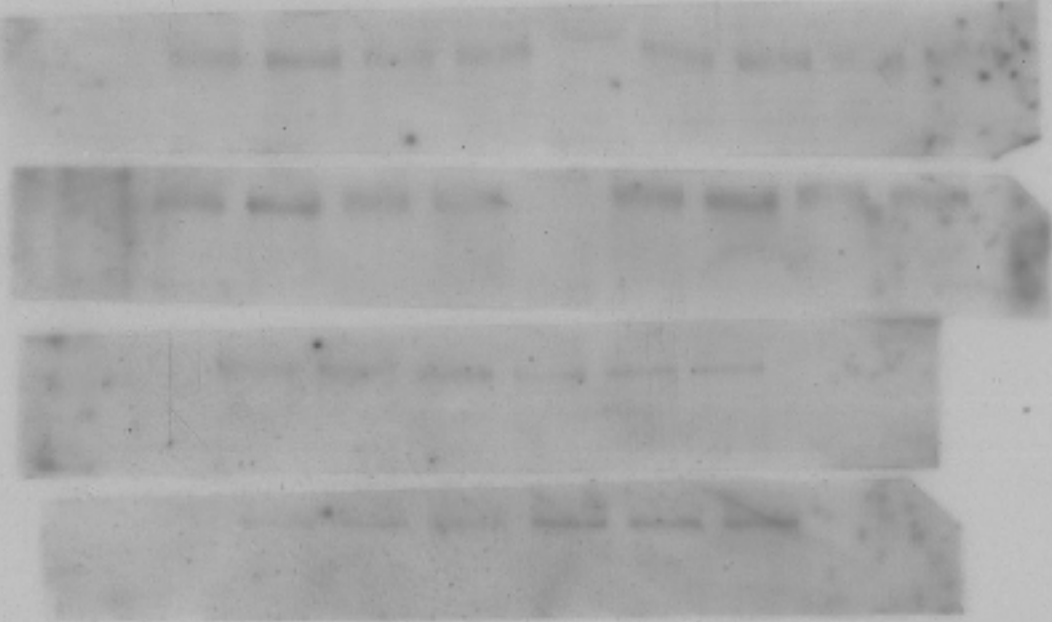

YTHFAQIUQF

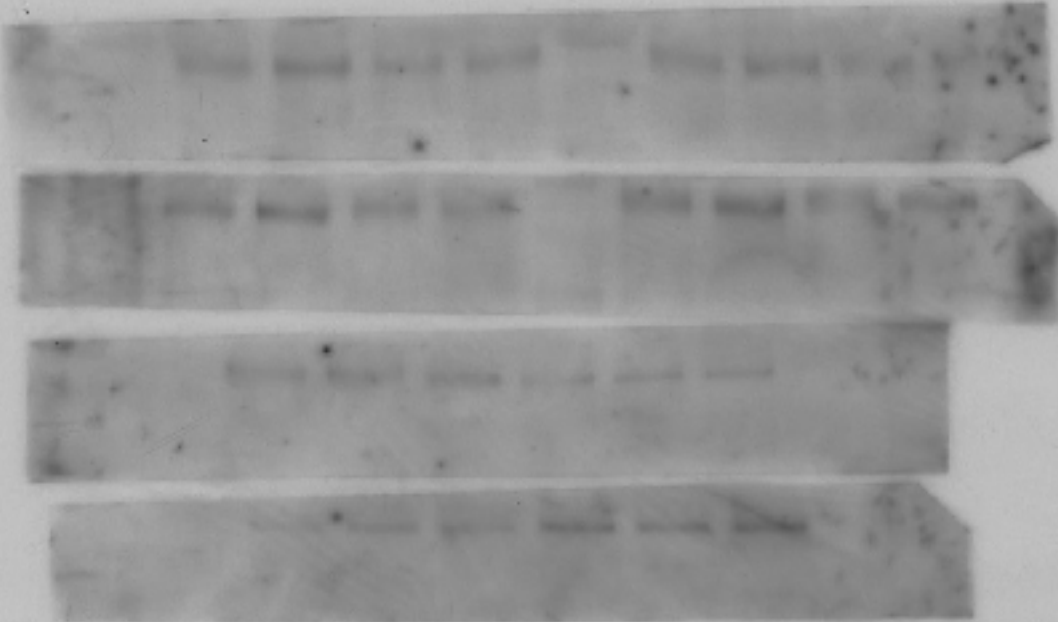

con S P S+P

IP: sEH IB:p-Tyr

YTHFAQIUQF

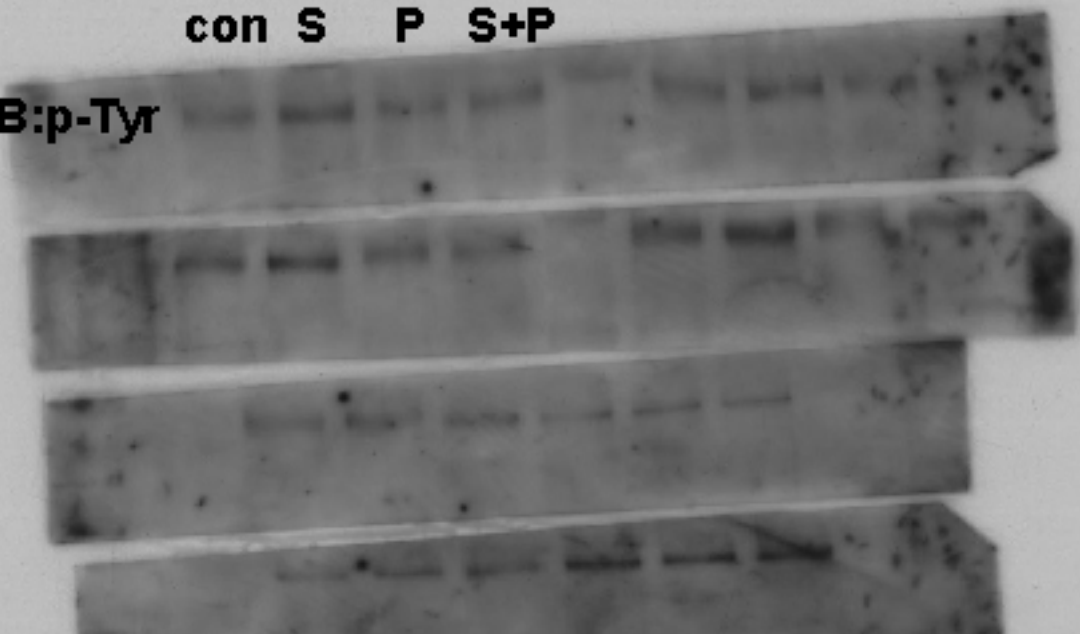

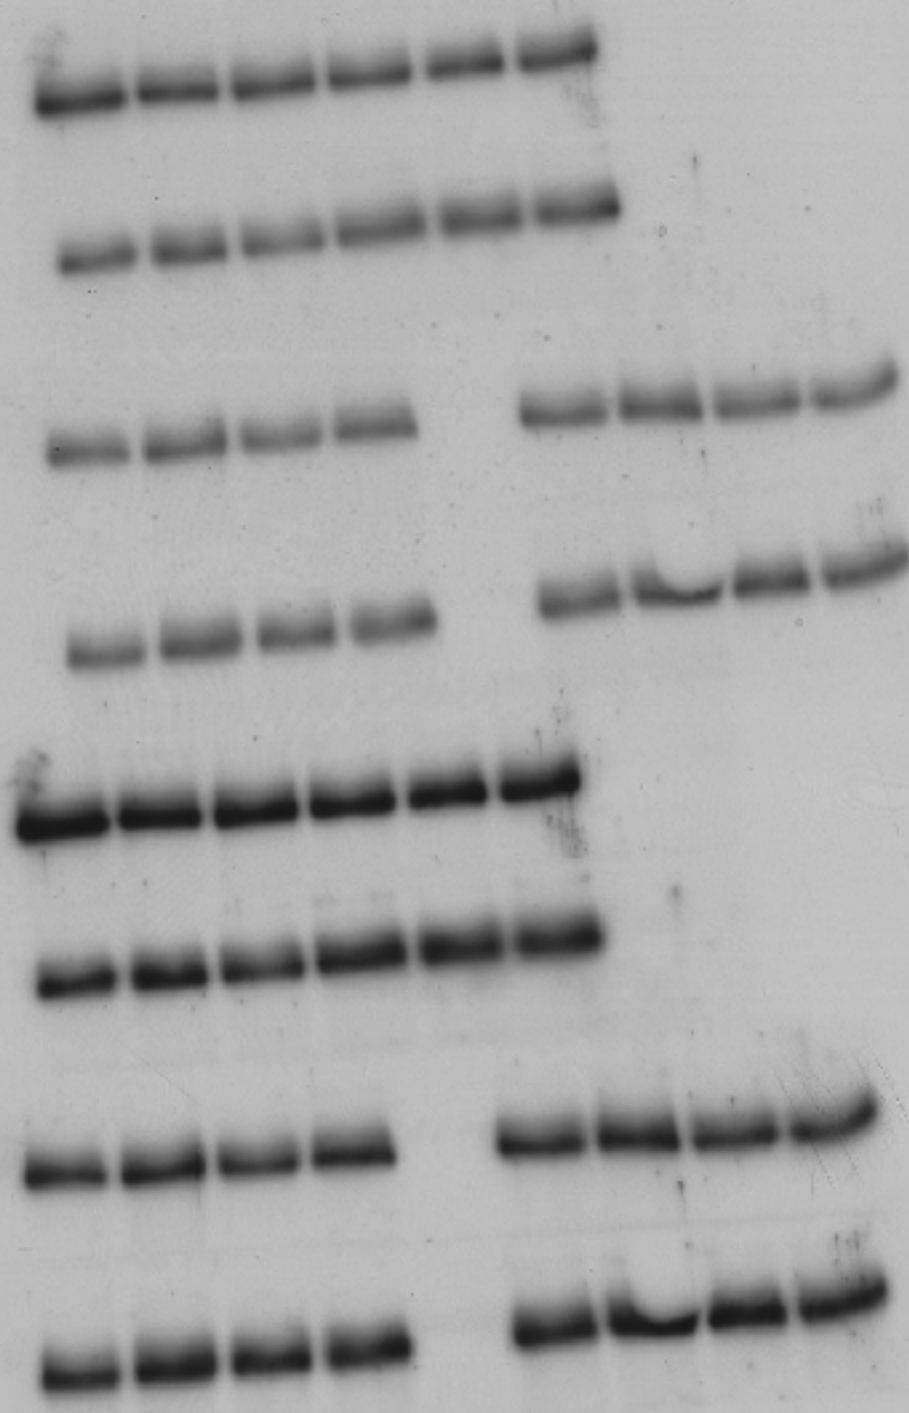

con S P S+P

IP: sEH IB:sEH



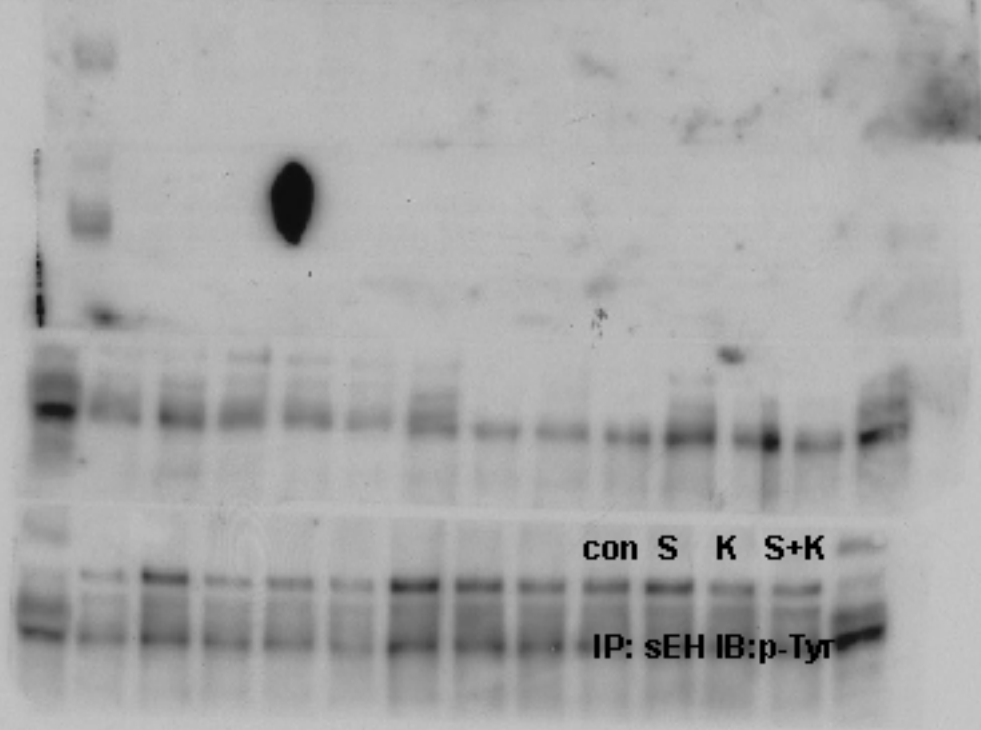

con S K S+K

IP: sEH IB: p-Tyr

...FUJIFILM SAFETY ...

...FUJIFILM SAFETY ...

Mr

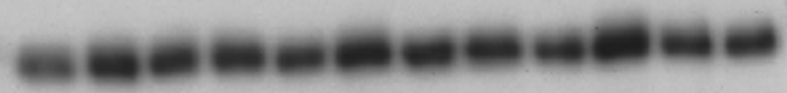

con S K S+K

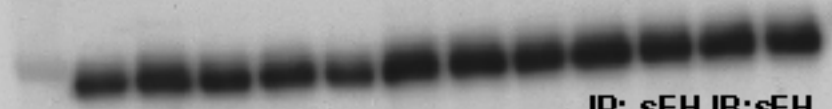

IP: sEH IB:sEH

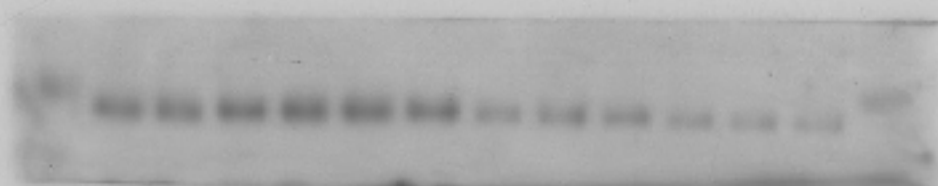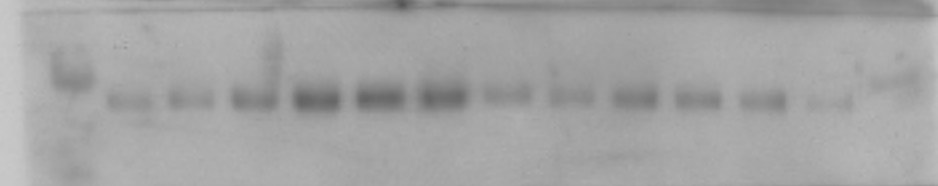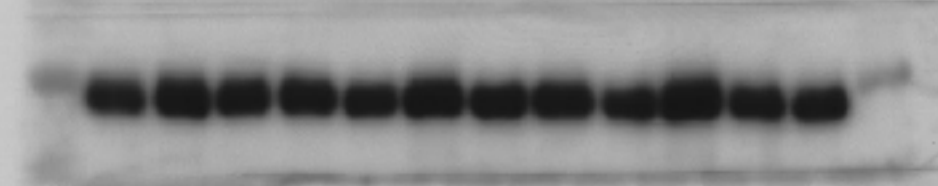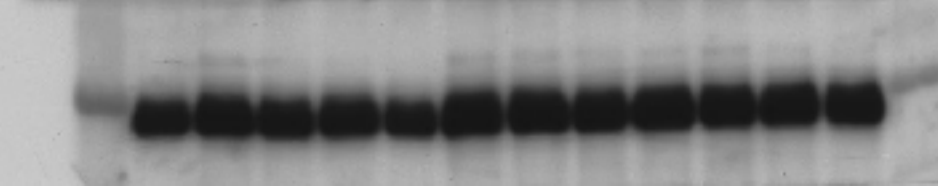

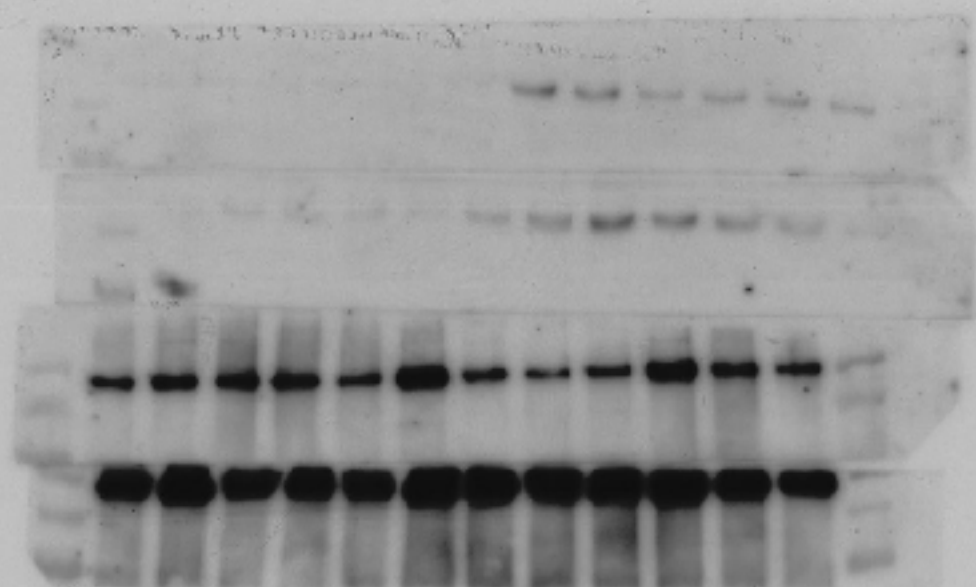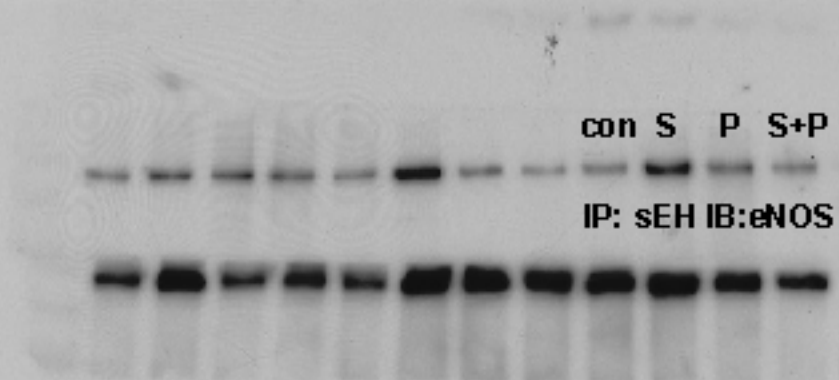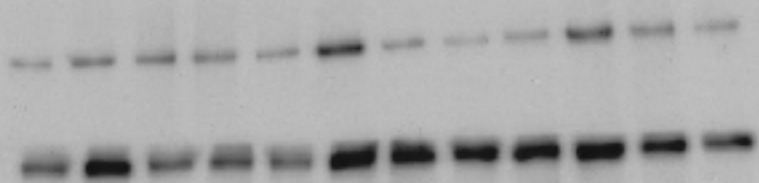

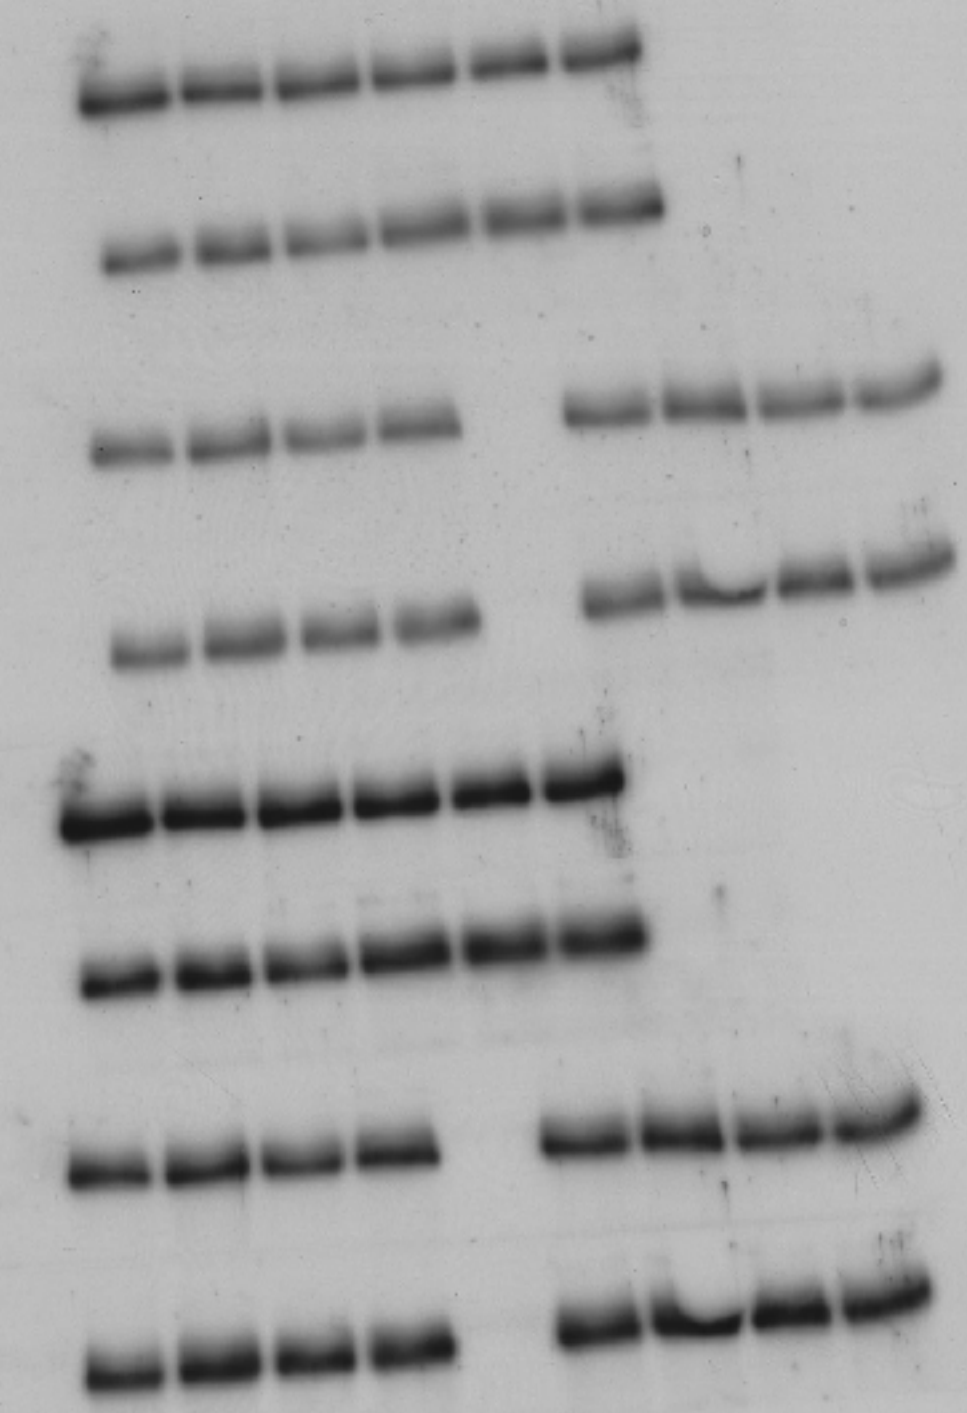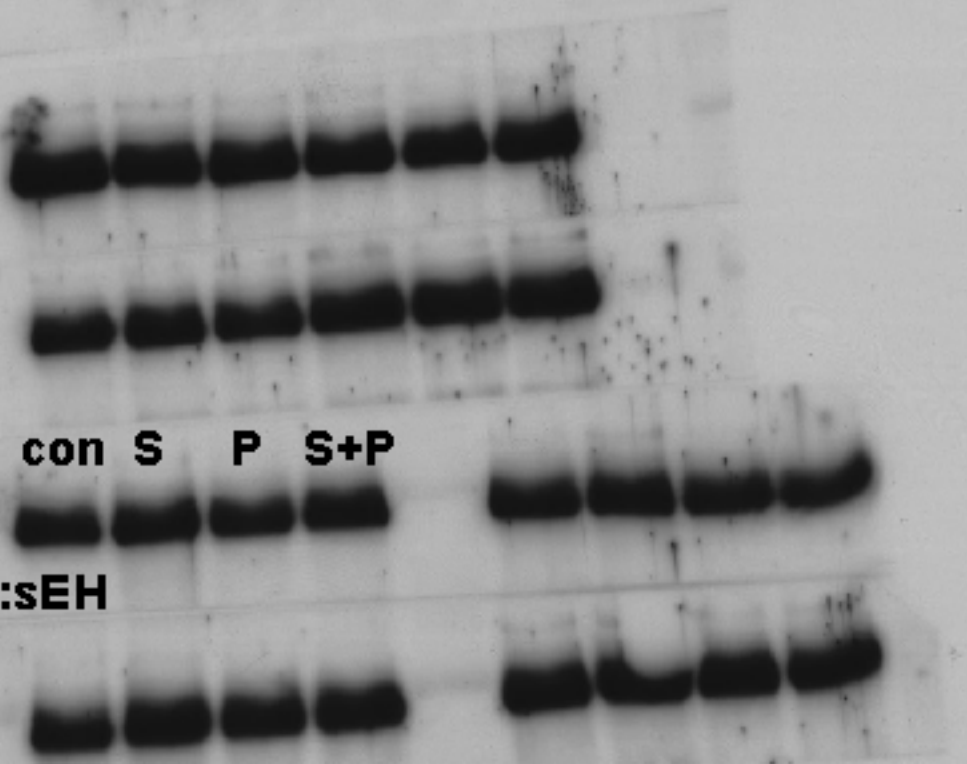

**con S P S+P**

**IP: sEH IB:sEH**

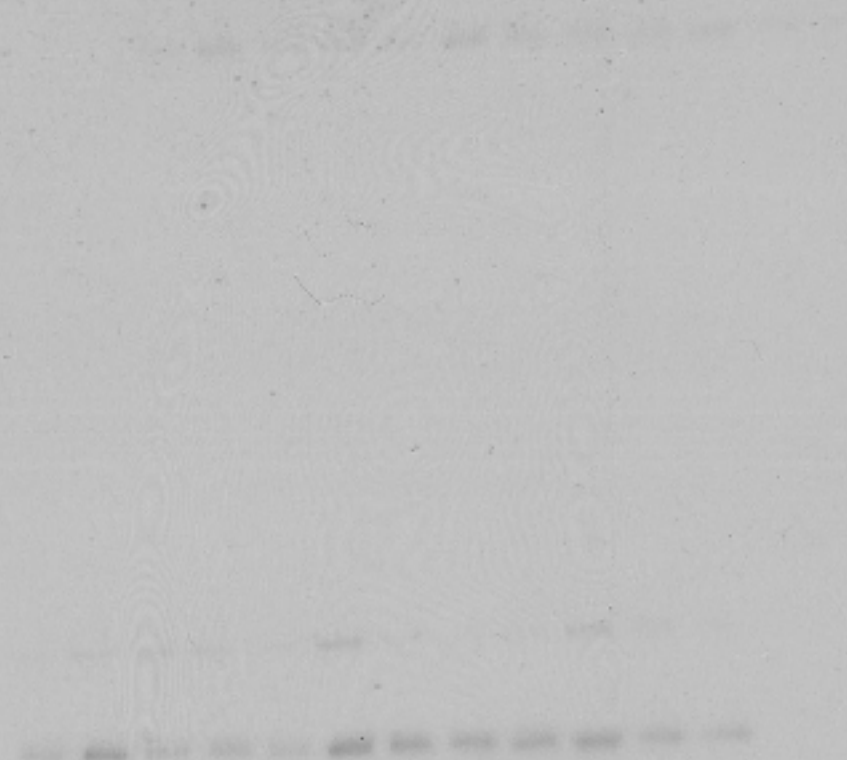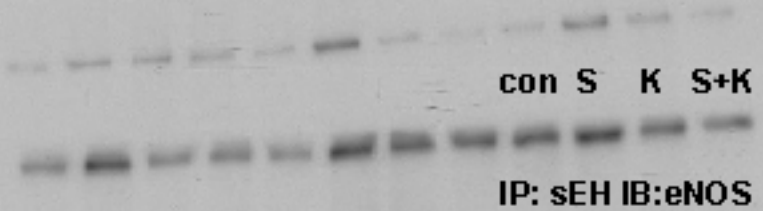

221

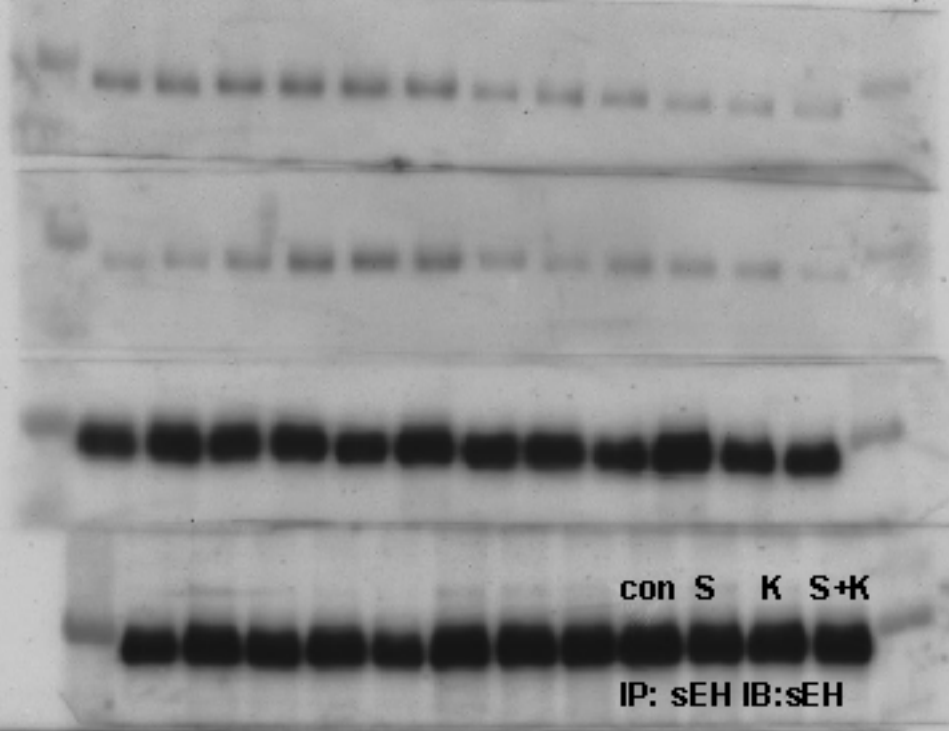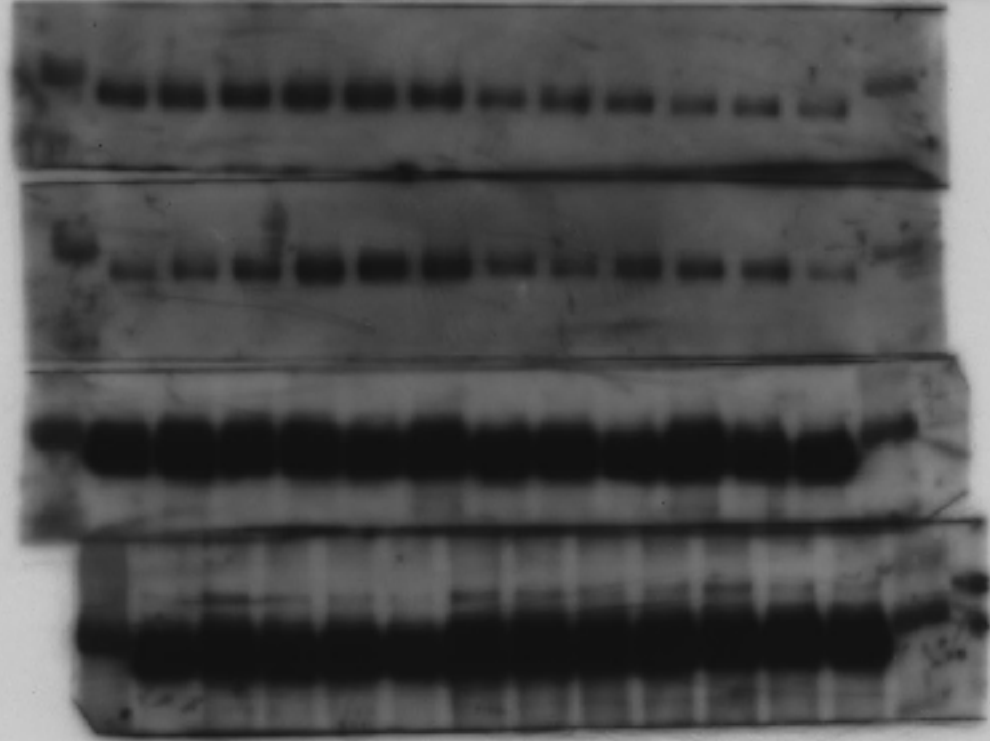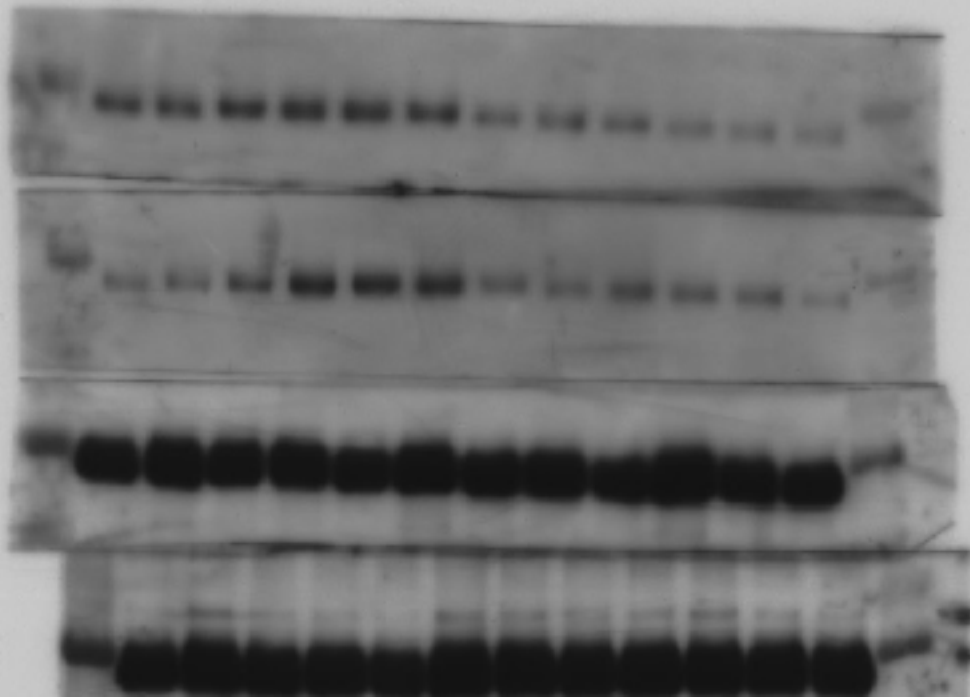

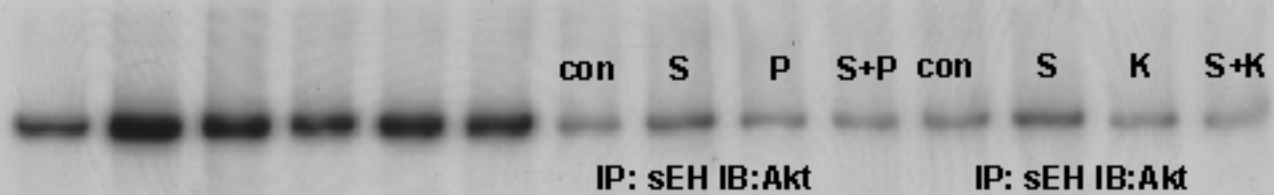



.....

.....

con S P S+P con S K S+K

IP: sEH IB:sEH IP: sEH IB:sEH

23



.....

.....

con S P S+P con S K S+K

IP: sEH IB:sEH IP: sEH IB:sEH

23

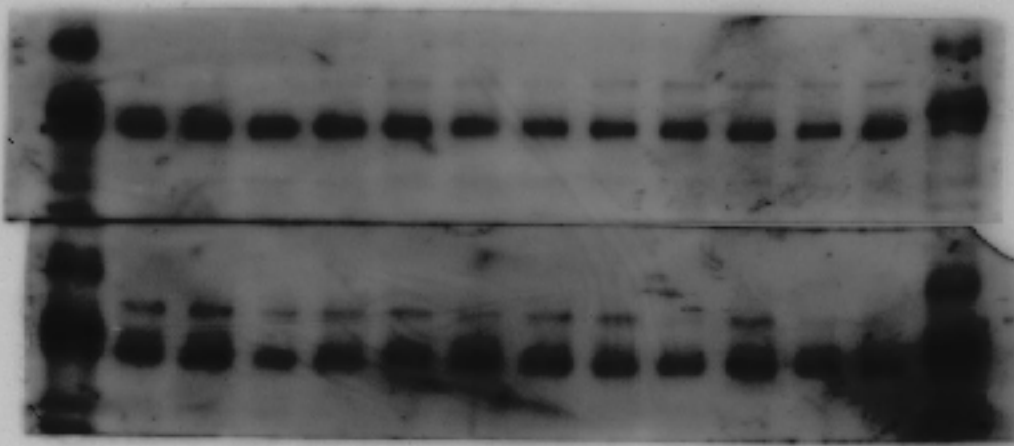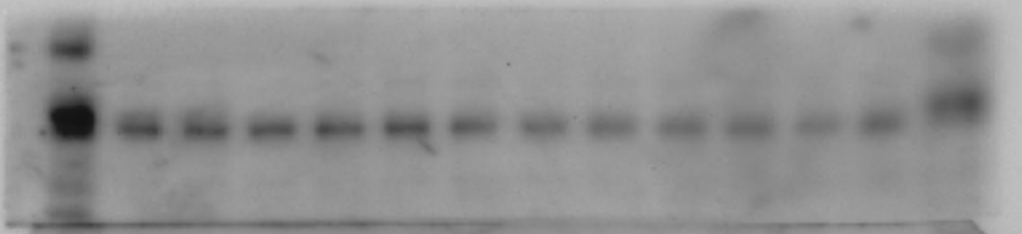

con S P S+P con S K S+K

IP: sEH IB:AMPK IP: sEH IB:AMPK

29

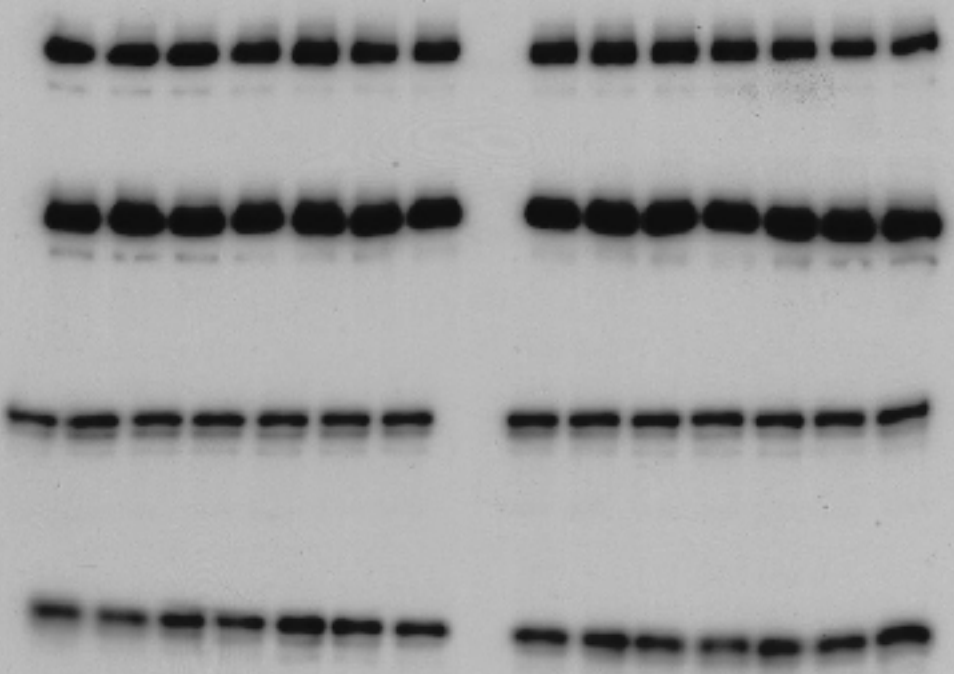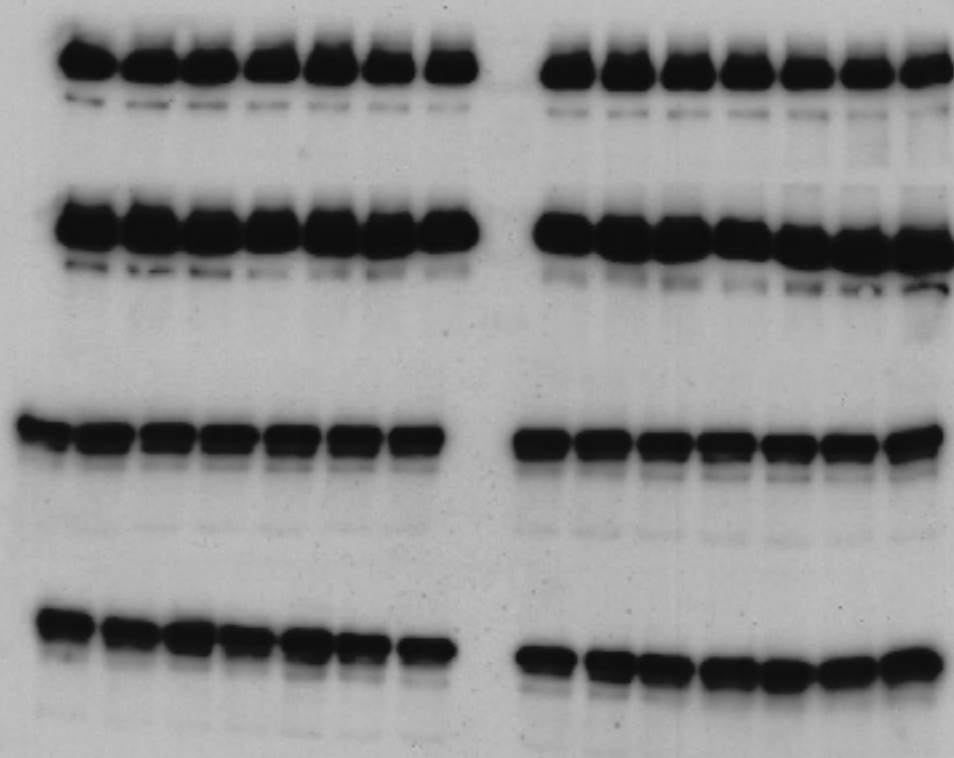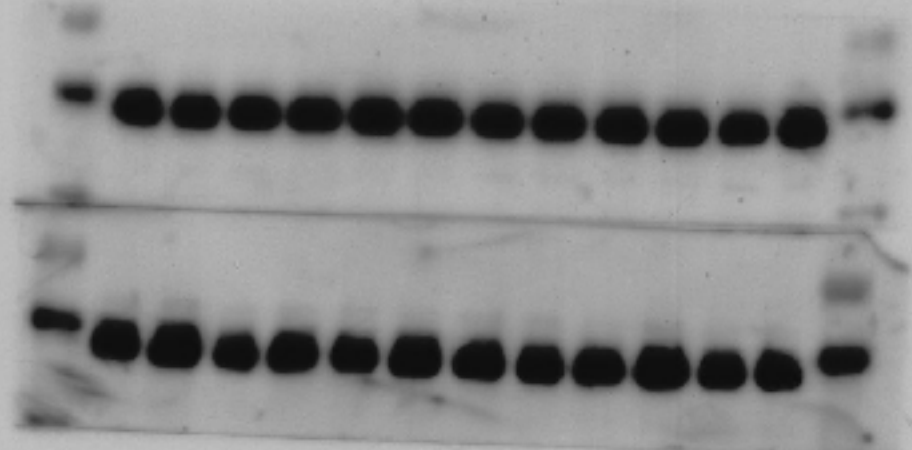

con S P S+P con S K S+K

IP: sEH IB: sEH IP: sEH IB: sEH

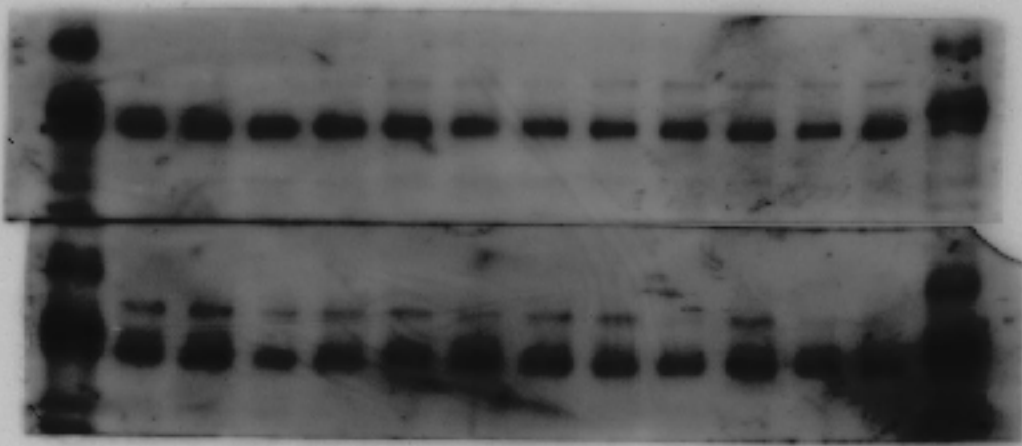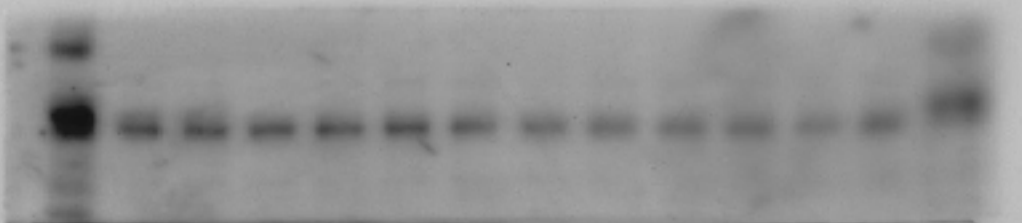

con S P S+P con S K S+K

IP: sEH IB:AMPK IP: sEH IB:AMPK

29

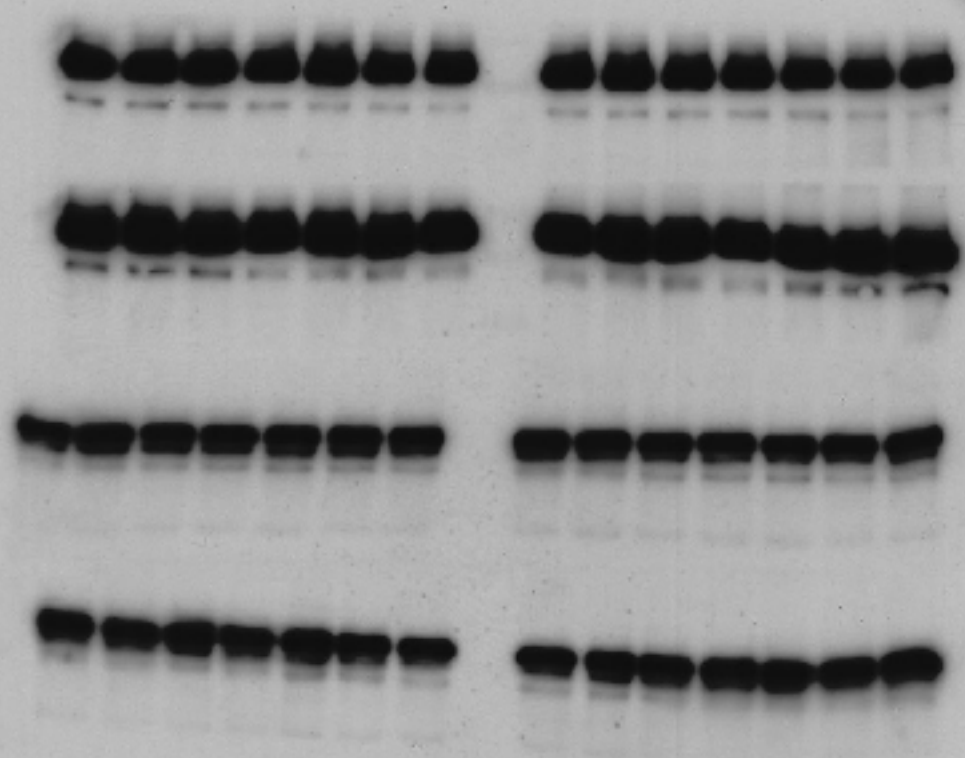

con S P S+P con S K S+K

IP: sEH IB: sEH IP: sEH IB: sEH
